# Supplementary material for: Mannich-type modifications of (−)-cannabidiol and (−)-cannabigerol leading to new, bioactive derivatives
Source: Springer Nature journal article supplement (doi:10.1038/s41598-023-45565-7), 2023-11-10

## Supplementary information

### Mannich-Type Modifications Of (-)-Cannabidiol And (-)-Cannabigerol Leading To New, Bioactive Derivatives

Eszter Boglárka Lőrincz, Gergely Tóth, Júlia Spolárics, Mihály Herczeg, Jan Hodek, István Zupko, Renáta Minorics, Dorottya Ádám, Attila Oláh, Christos C. Zouboulis, Jan Weber, Lajos Nagy, Eszter Ostorházi, Ildikó Bácskay, Anikó Borbás, Pál Herczegh, Ilona Bereczki

#### Table of content

|                                                                     |     |
|---------------------------------------------------------------------|-----|
| 1. Antiproliferative effect of the salt derivative compound 8s..... | S2  |
| 2. Antibacterial data against Gram-positive bacteria.....           | S3  |
| 3. NMR data of CBD and its derivatives.....                         | S4  |
| 4. NMR data of CBG and its derivatives.....                         | S22 |

## 1. Antiproliferative effect of the salt derivative compound **8s**

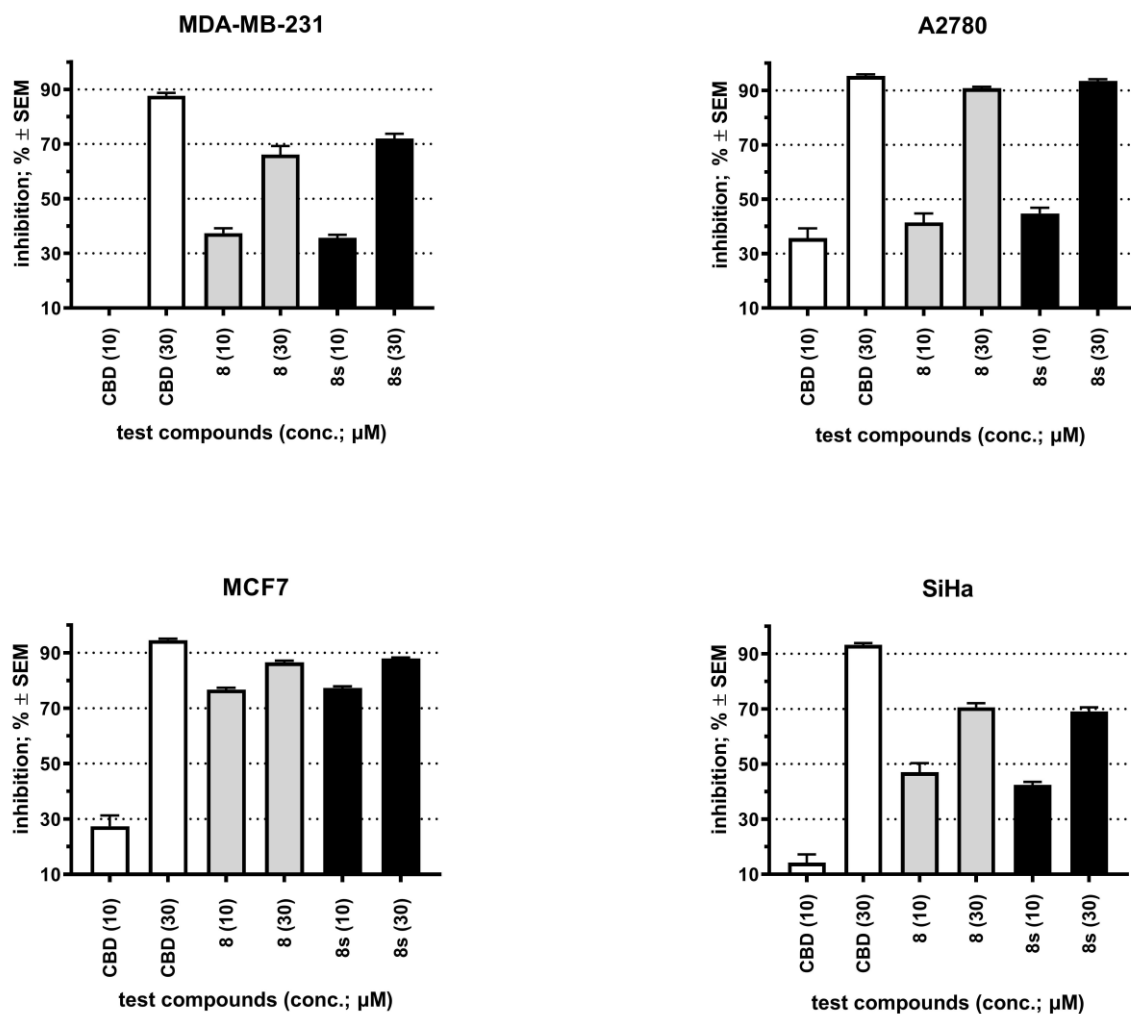

**Figure S1.** Antiproliferative properties of compound **8s** compared to CBD and its free base derivative (**8**) (10 and 30 μM). Inhibition values less than 10% are considered negligible and not presented for clarity.

## 2. Antibacterial data against Gram-positive bacteria

**Table S1.** Antibacterial effects of CBD, CBG and their derivatives against Gram-positive bacteria

|                                                      | CBD          | 8    | 8s  | 9    | 10/12/13 | 11   | CBG | 16b/17a/<br>18/21b | 20   |
|------------------------------------------------------|--------------|------|-----|------|----------|------|-----|--------------------|------|
|                                                      | (MIC, µg/ml) |      |     |      |          |      |     |                    |      |
| <i>Bacillus subtilis</i>                             | 4            | >256 | 128 | >256 | >256     | >256 | 2   | >256               | >256 |
| MSSA                                                 | 4            | >256 | 128 | >256 | >256     | >256 | 4   | >256               | >256 |
| MRSA                                                 | 4            | >256 | 128 | >256 | >256     | >256 | 4   | >256               | >256 |
| <i>Staphylococcus epidermidis</i><br>biofilm forming | 8            | >256 | 128 | >256 | >256     | >256 | 8   | >256               | >256 |
| <i>Staphylococcus epidermidis</i><br>mecA            | 8            | >256 | 128 | >256 | >256     | >256 | 8   | >256               | >256 |
| <i>Enterococcus faecalis</i> 29 212                  | 2            | 2    | 2   | 8    | >256     | 128  | 4   | 64                 | 64   |
| <i>Enterococcus faecalis</i> 15 376<br>VanA          | 4            | >256 | 128 | 128  | >256     | >256 | 4   | >256               | 128  |
| <i>Enterococcus faecalis</i> 51299<br>VanB           | 4            | 2    | 2   | 8    | >256     | 128  | 4   | 64                 | 128  |

MIC: Minimum Inhibitory Concentration; MSSA: Methicillin Sensitive *Staphylococcus aureus*; MRSA: Methicillin Resistant *Staphylococcus aureus*; mecA: mecA gene expression; vanA: vanA gene positive; vanB: vanB gene positive.

### 3. NMR data of CBD and its derivatives

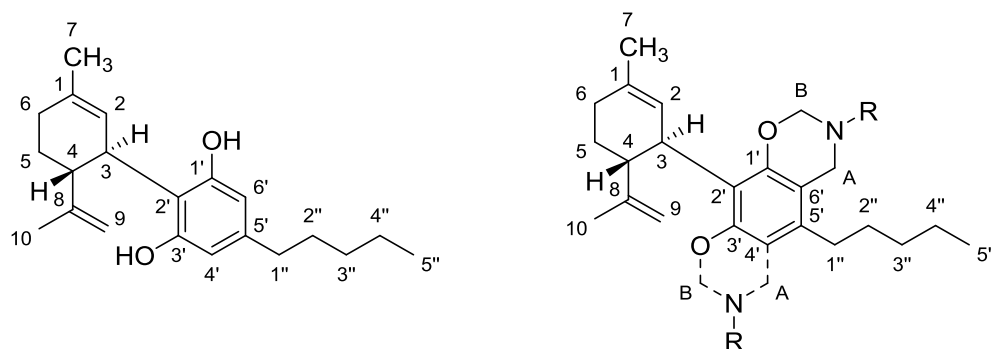

**Figure S2.** Numbering of CBD and its derivatives.

#### NMR data of cannabidiol:

$^1\text{H}$  NMR (500 MHz,  $\text{CDCl}_3$ ):  $\delta$  (ppm) 6.34-6.09 (m, 2H, aromatic CH), 6.00 (bs, 1H, OH), 5.56 (m, 1H, H-2 CH), 4.95 (bs, 1H, OH), 4.64 (m, 1H, H-9  $\text{CH}_2\text{a}$ ), 4.54 (m, 1H, H-9  $\text{CH}_2\text{b}$ ), 3.90-3.83 (m, 1H, H-3 CH), 2.46-2.36 (m, 3H, H-1''  $\text{CH}_2$  and H-4 CH), 2.29-2.17 (m, 1H, H-6  $\text{CH}_2\text{a}$ ), 2.13-2.04 (m, 1H, H-6  $\text{CH}_2\text{b}$ ), 1.86-1.72 (m, 5H, H-5  $\text{CH}_2$  and H-7  $\text{CH}_3$ ), 1.66 (s, 3H, H-10  $\text{CH}_3$ ), 1.59-1.50 (m, 2H, H-2''  $\text{CH}_2$ ), 1.35-1.22 (m, 4H, H-3'' and H-4''  $\text{CH}_2$ ), 0.87 (t, 3H,  $J = 6.9$  Hz, H-5''  $\text{CH}_3$ );  $^{13}\text{C}$  NMR (125 MHz,  $\text{CDCl}_3$ ):  $\delta$  (ppm) 149.3 (1C, C-8, quat.), 143.1 (1C, C-3', quat.), 140.1 (1C, C-1, quat.), 124.3 (1C, C-2, CH), 113.9 (1C, C-6', quat.), 111.0 (1C, C-9,  $\text{CH}_2$ ), 46.3 (1C, C-4, CH), 37.2 (1C, C-3, CH), 35.6 (1C, C-1'',  $\text{CH}_2$ ), 31.6 (1C, C-3'',  $\text{CH}_2$ ), 30.7 (1C, C-2'',  $\text{CH}_2$ ), 30.5 (1C, C-6,  $\text{CH}_2$ ), 28.5 (1C, C-5,  $\text{CH}_2$ ), 23.8 (1C, C-7,  $\text{CH}_3$ ), 22.6 (1C, C-4'',  $\text{CH}_2$ ), 20.5 (1C, C-10,  $\text{CH}_3$ ), 14.1 (1C, C-5'',  $\text{CH}_3$ ).

# NMR spectra of CBD

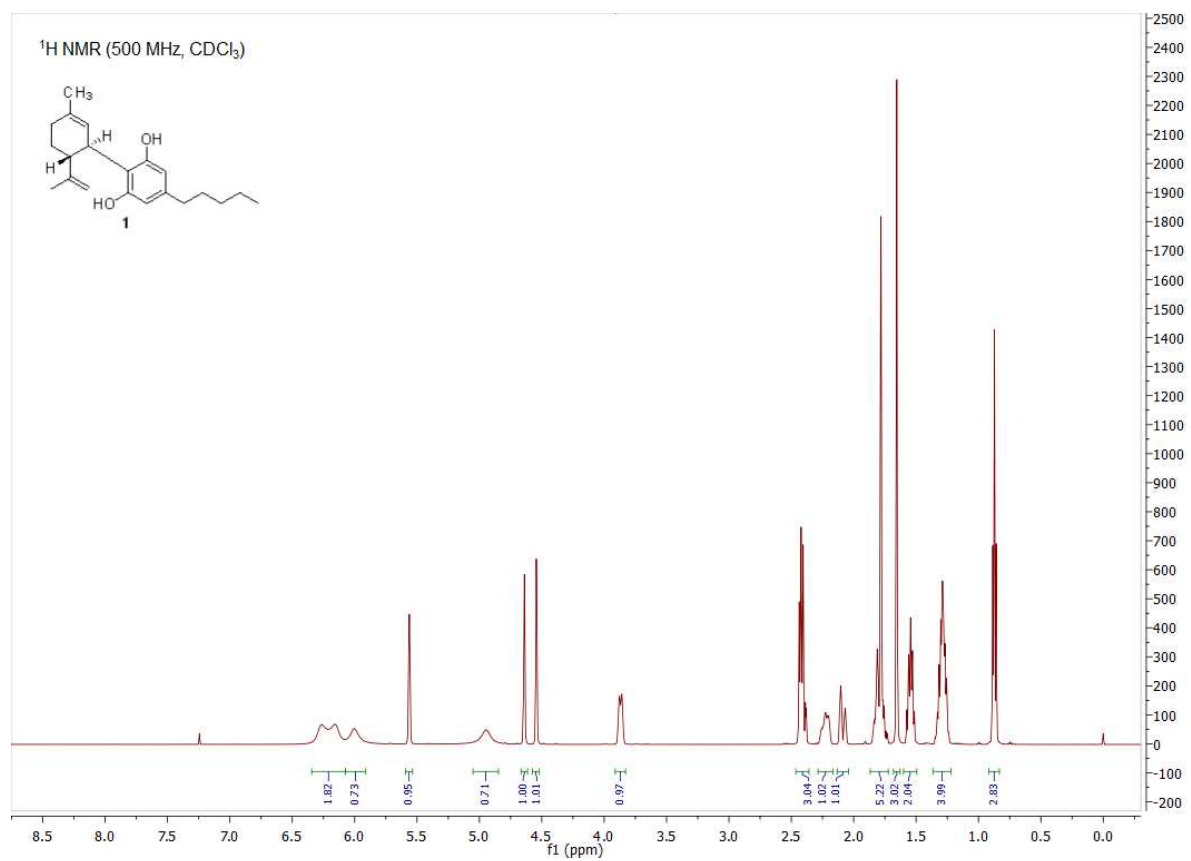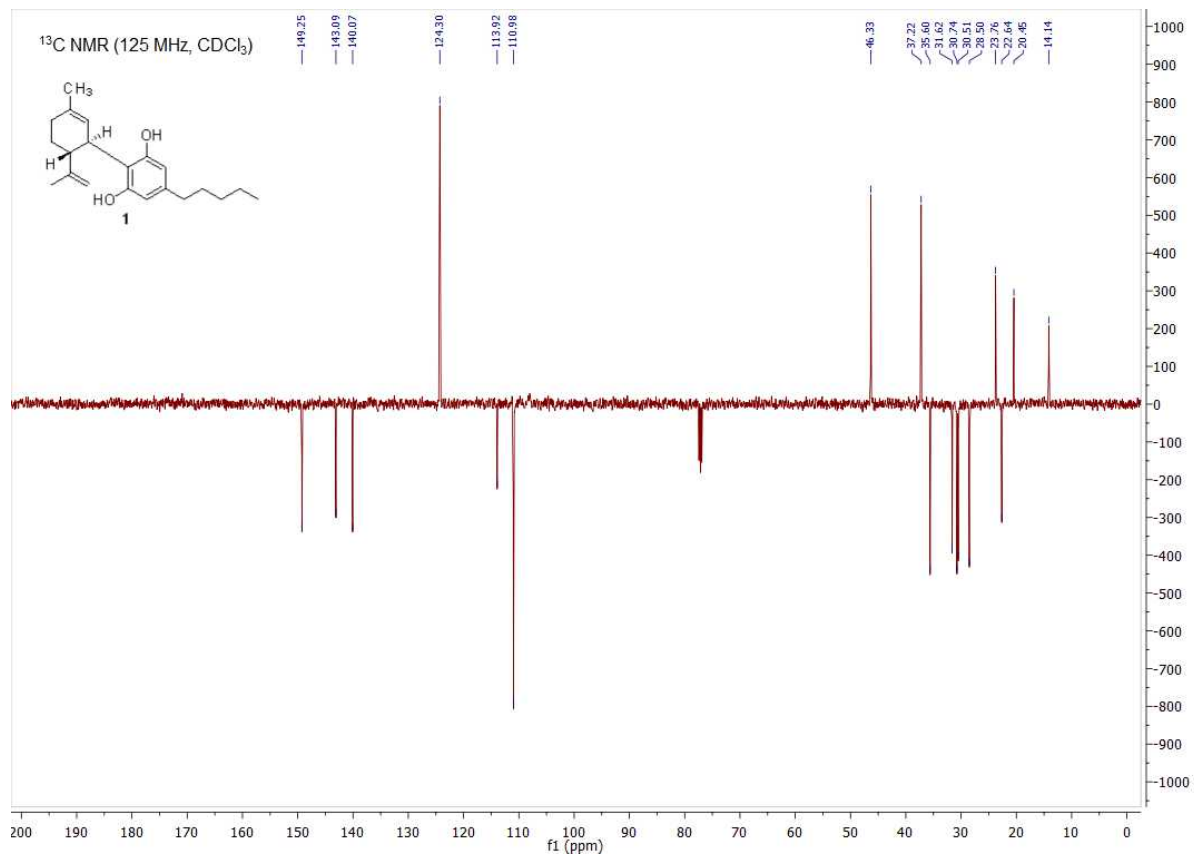

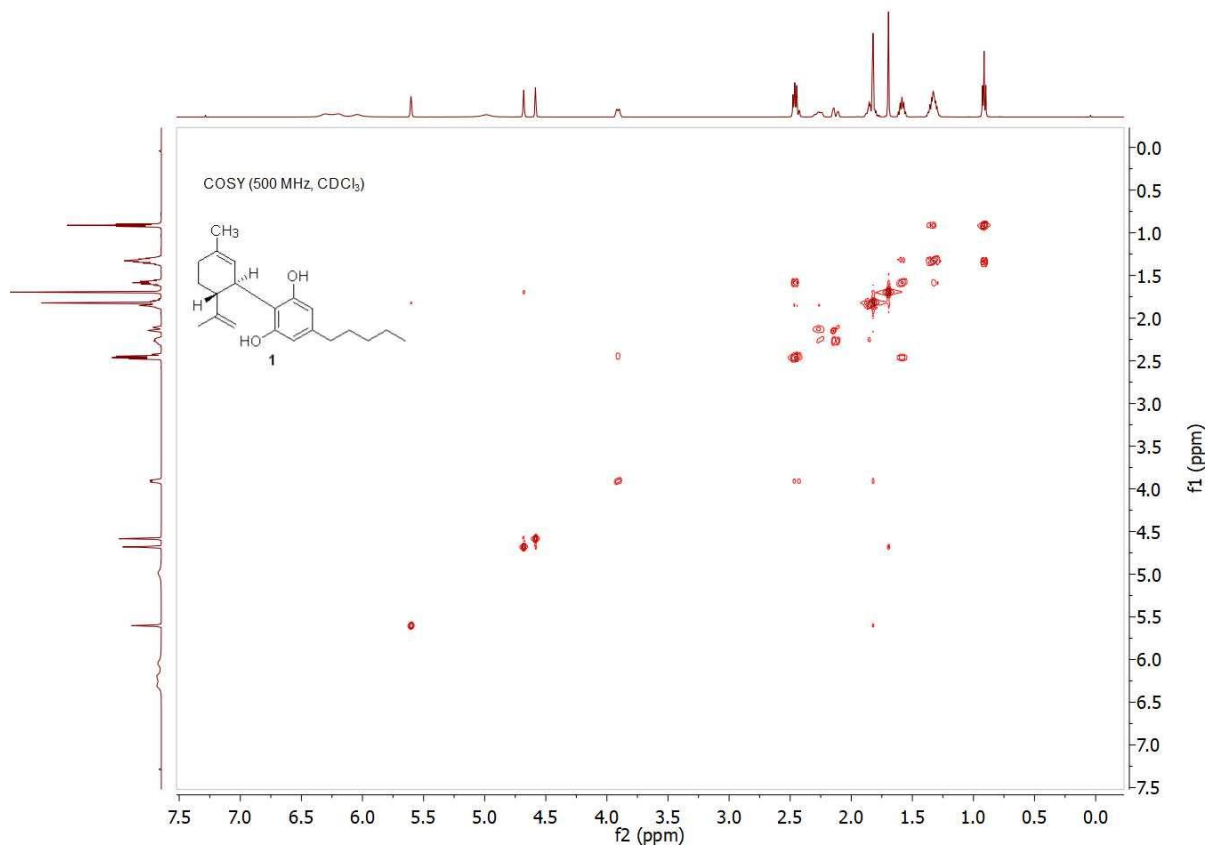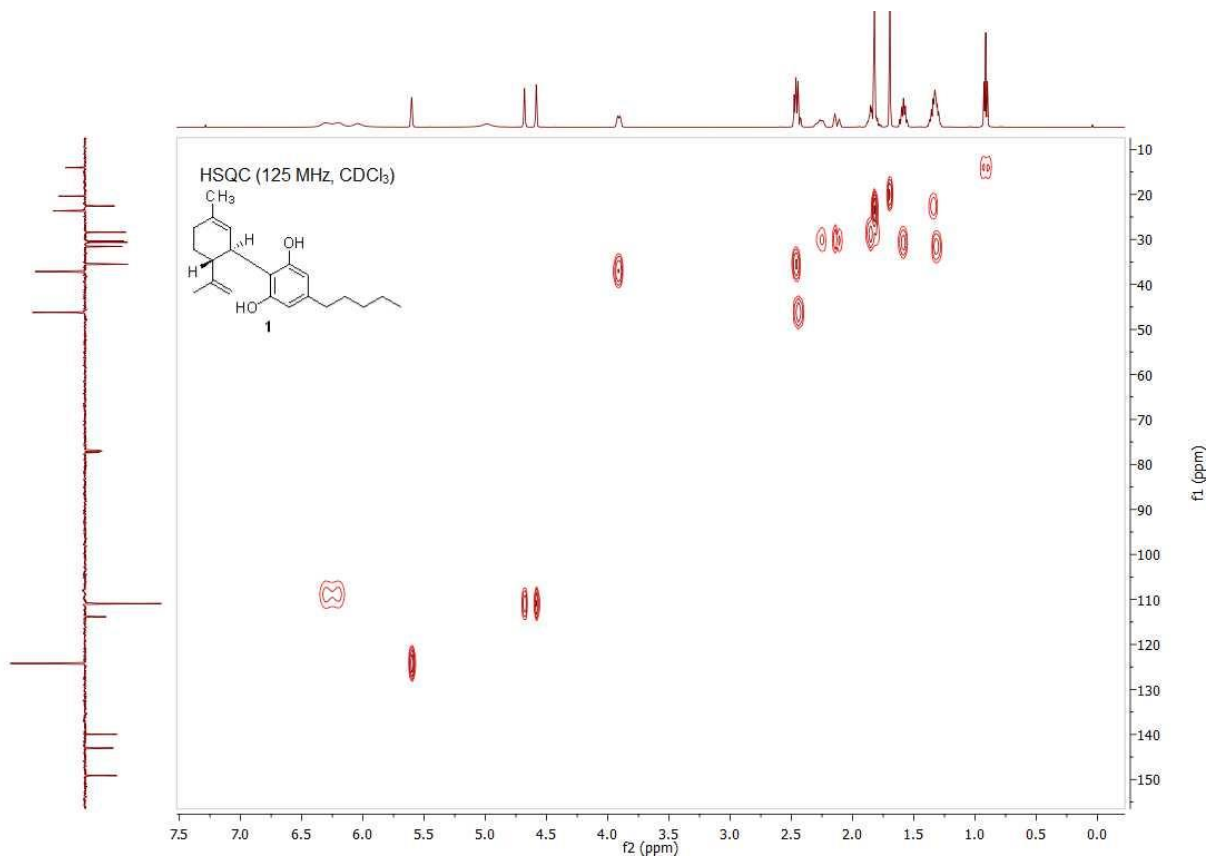

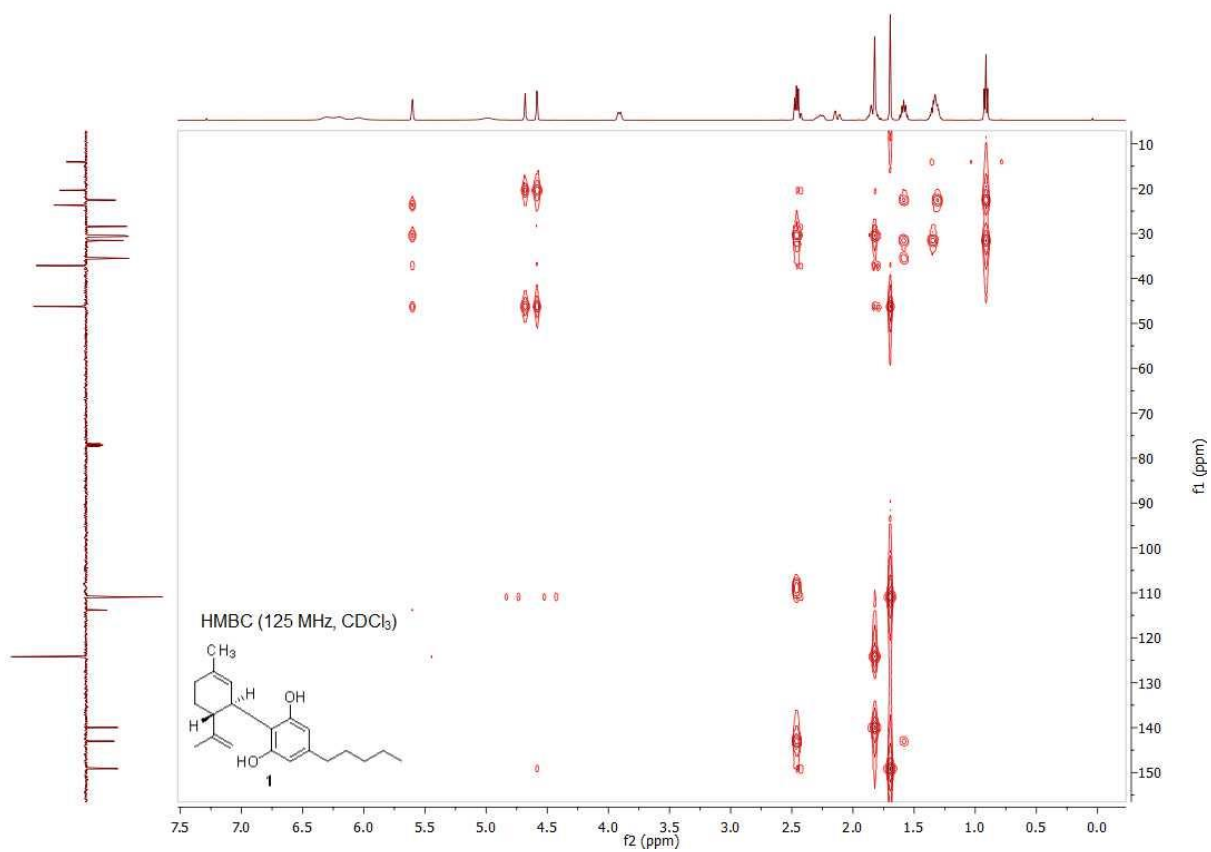

# NMR spectra of compound 8

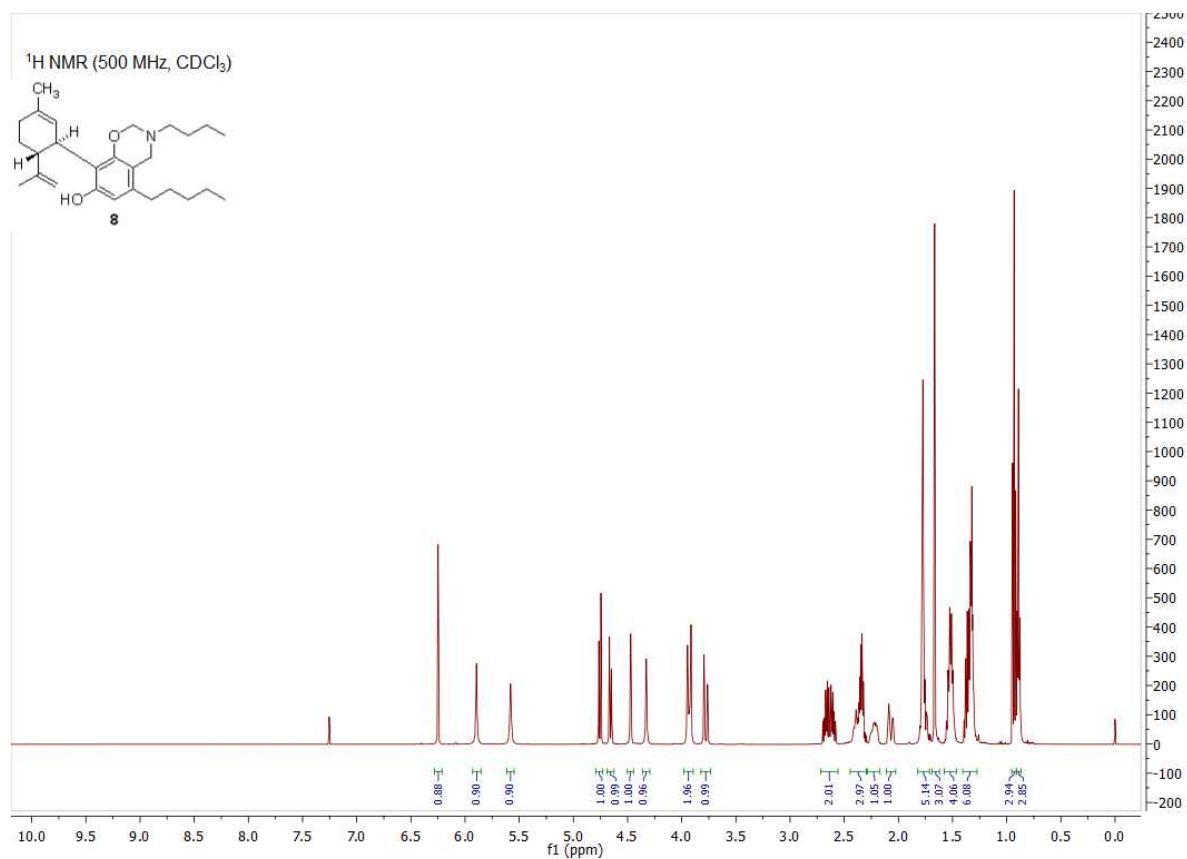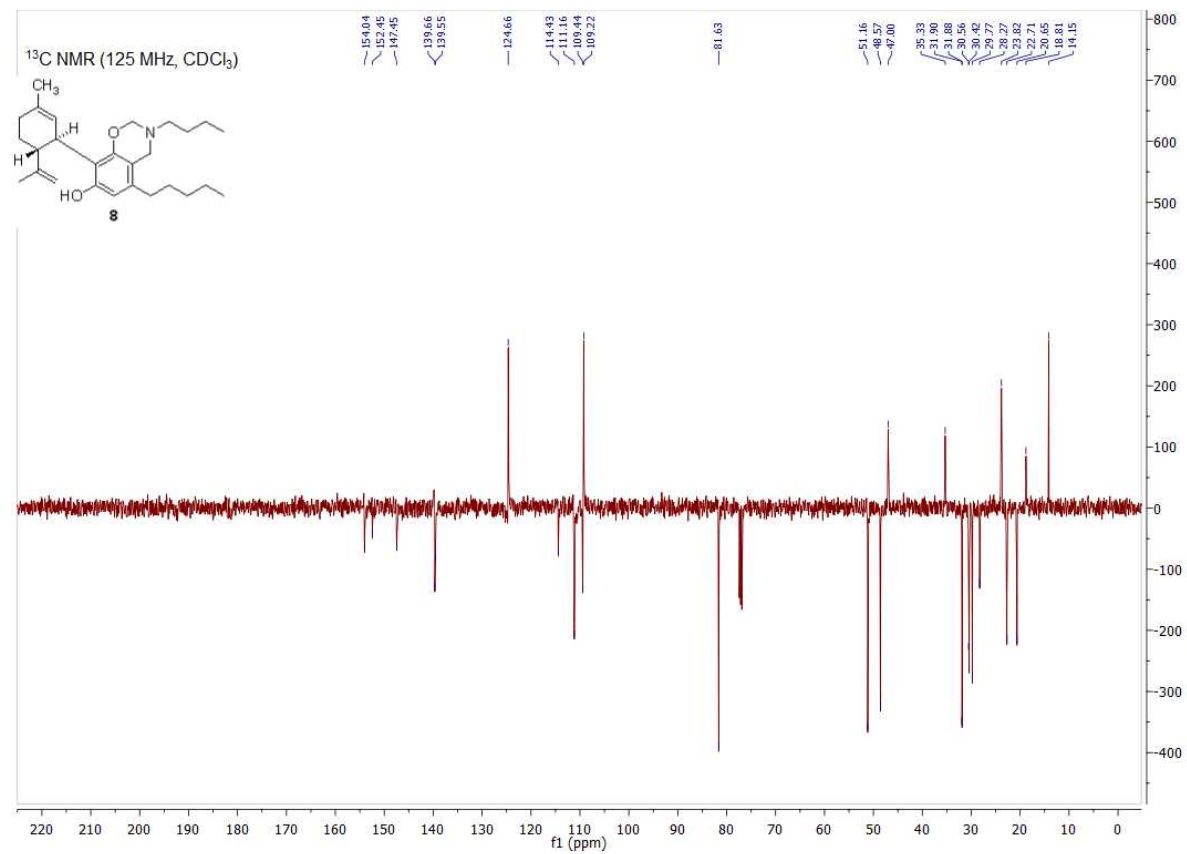

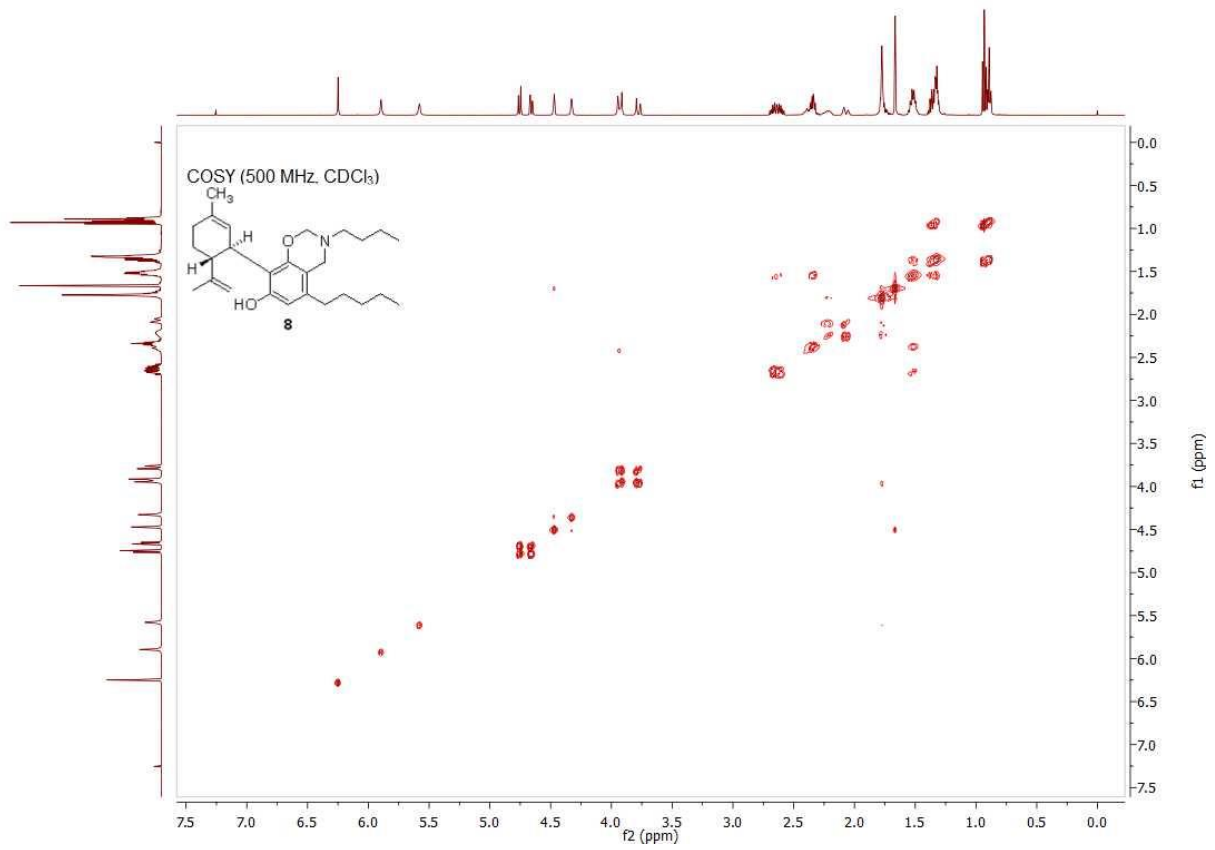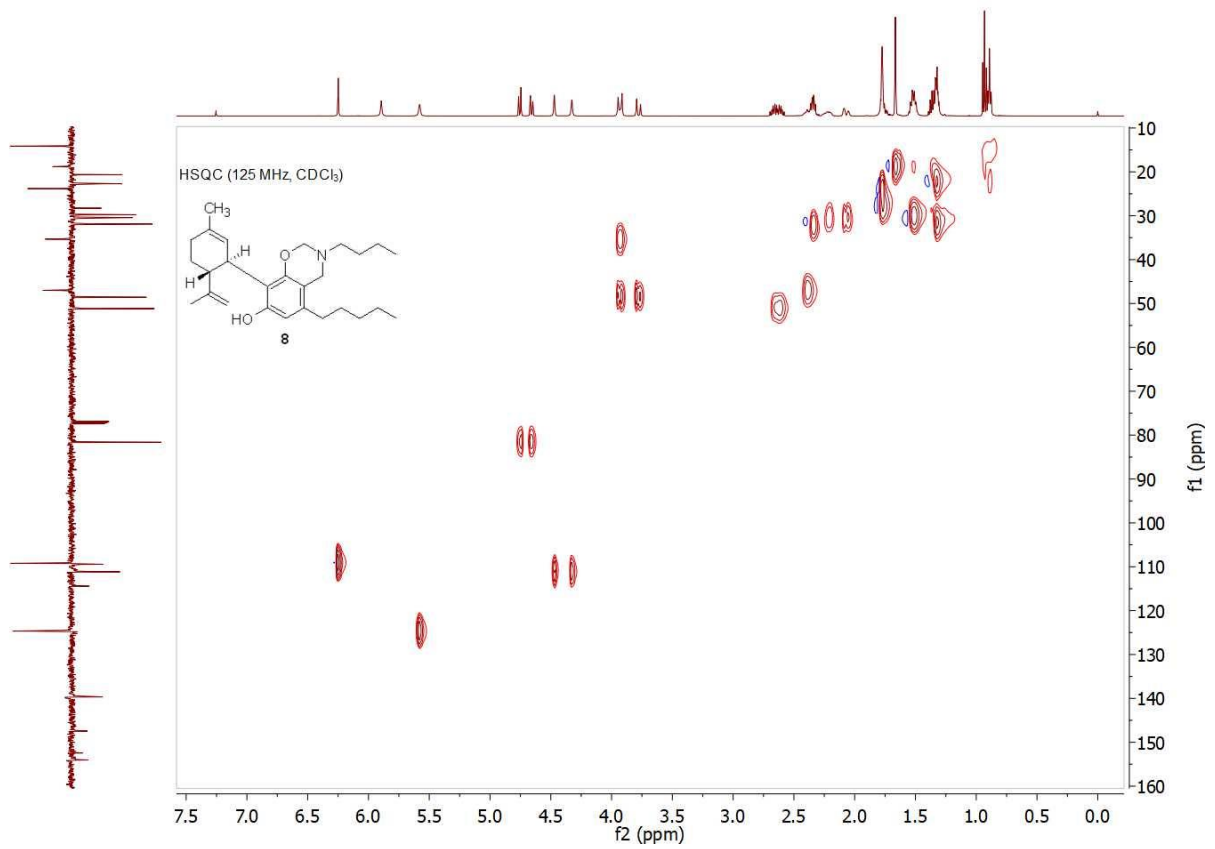

# NMR spectra of compound 9

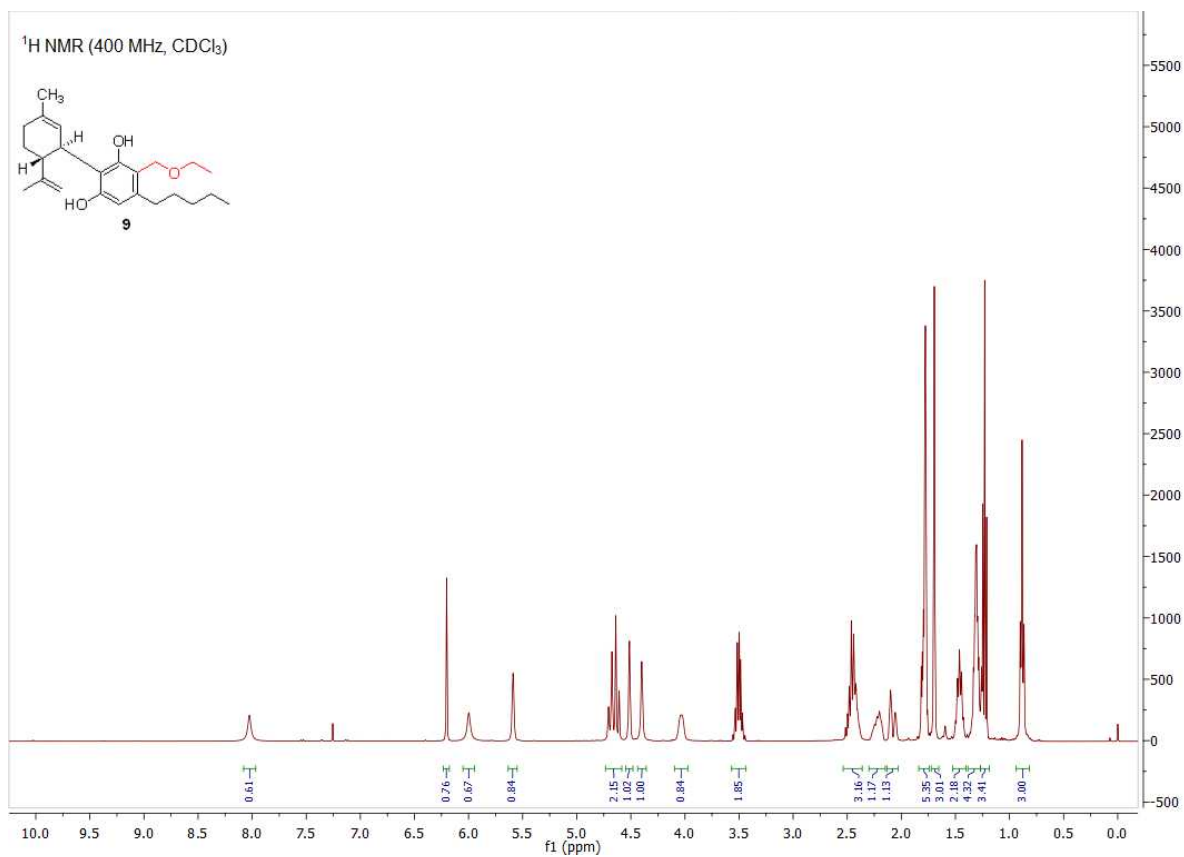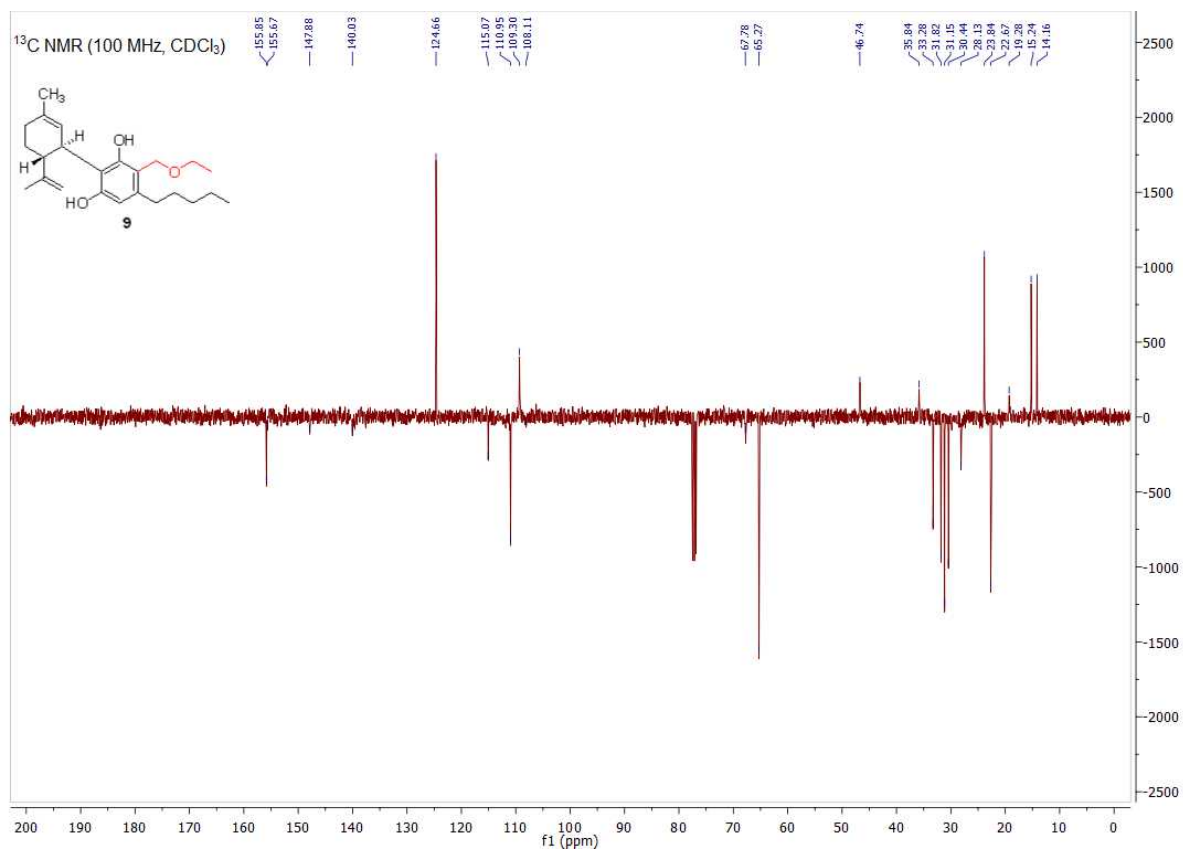

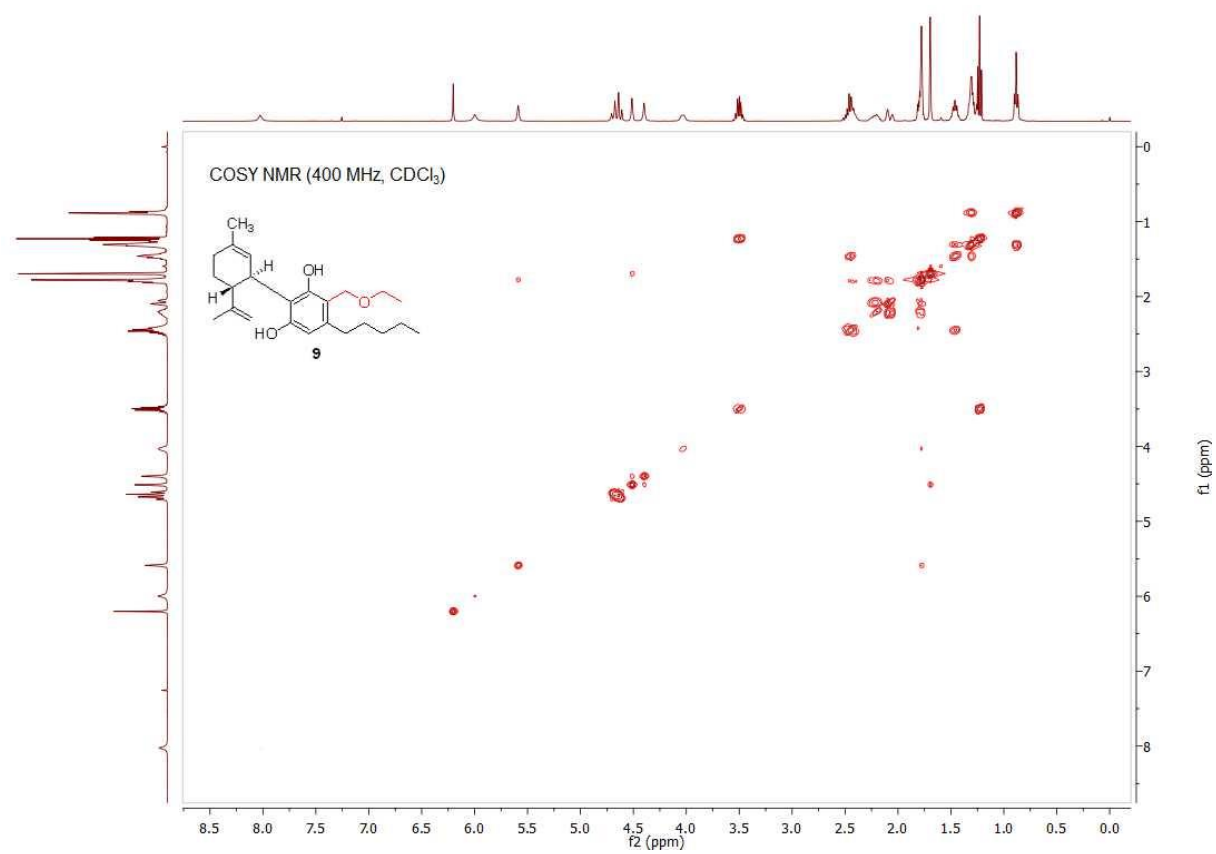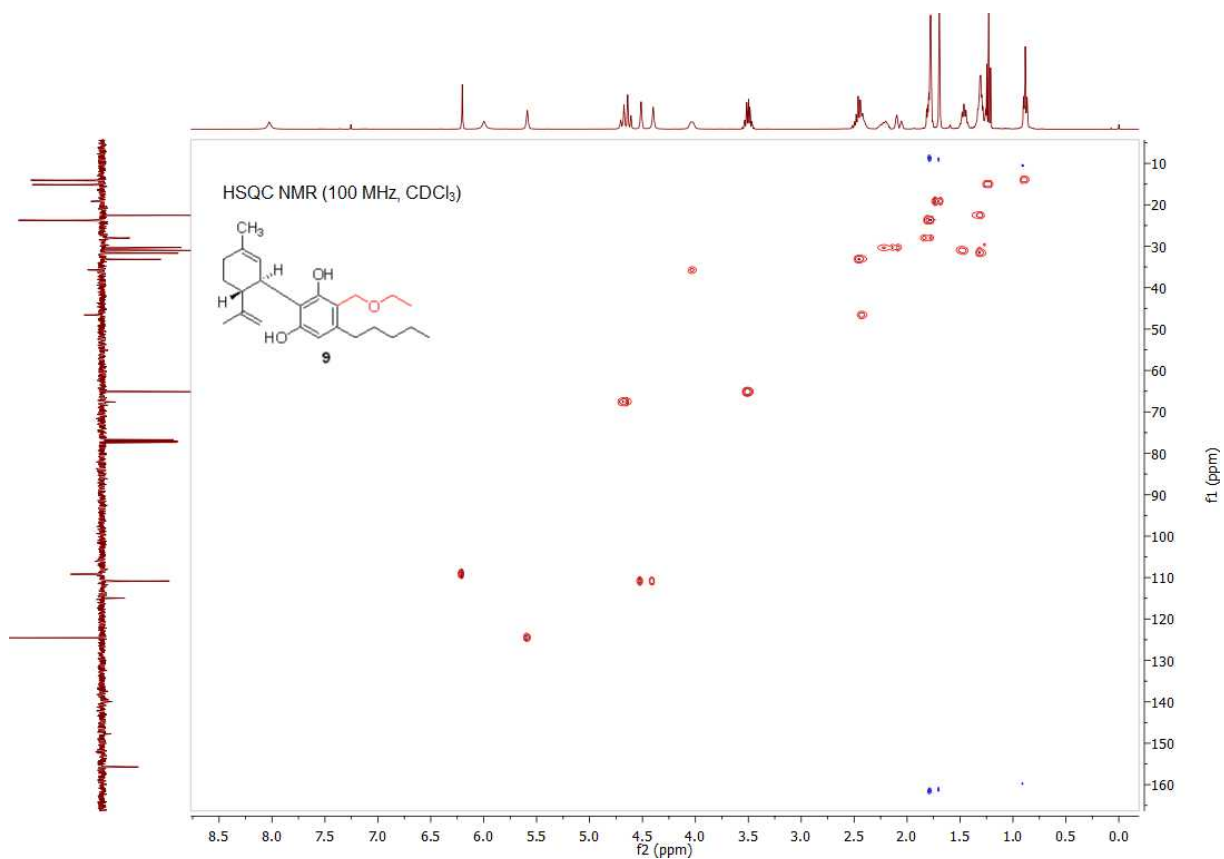

# NMR spectra of compound 10

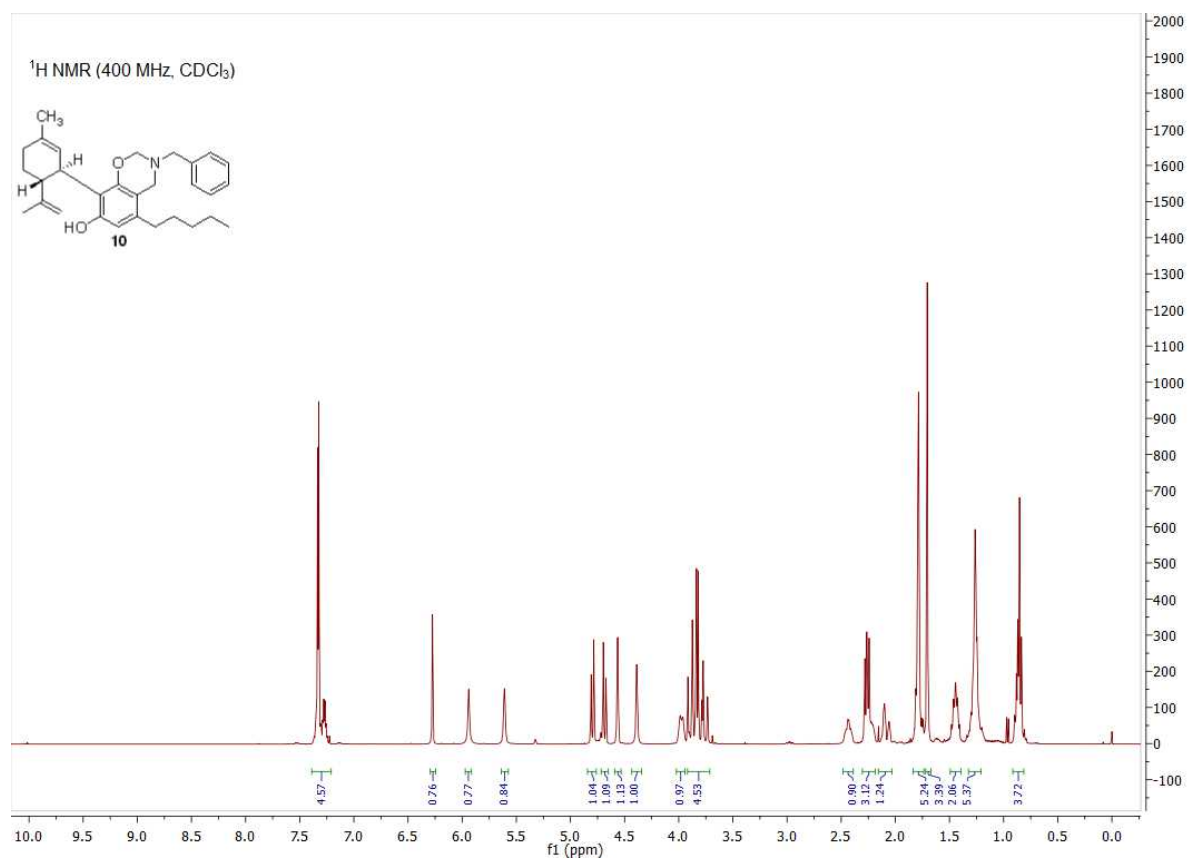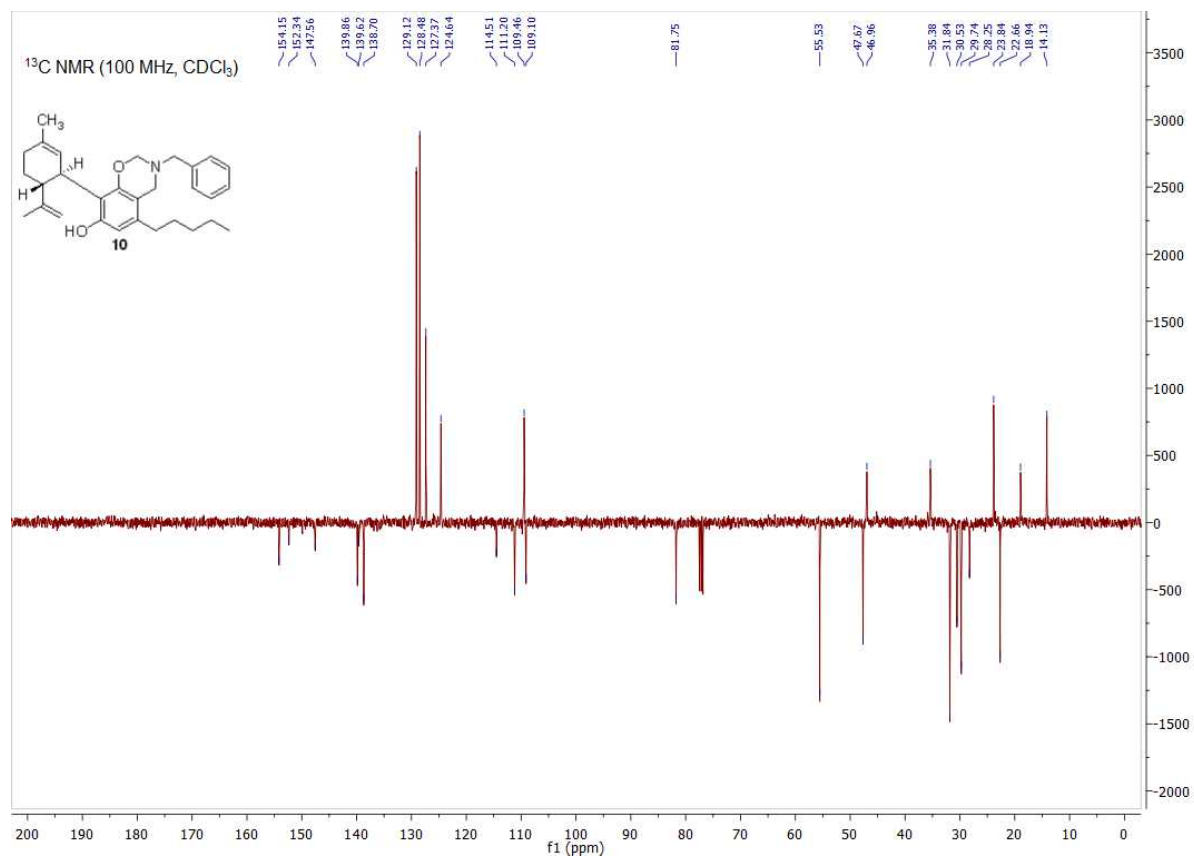

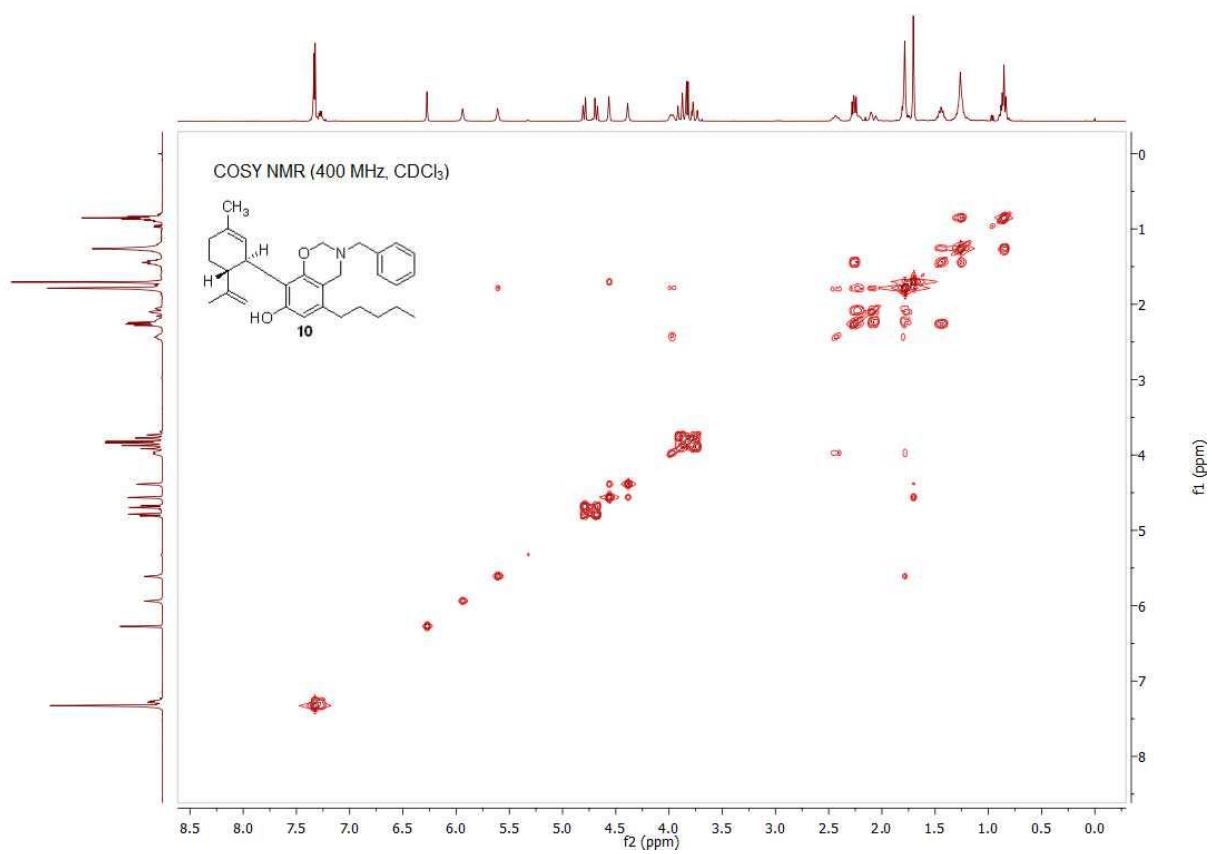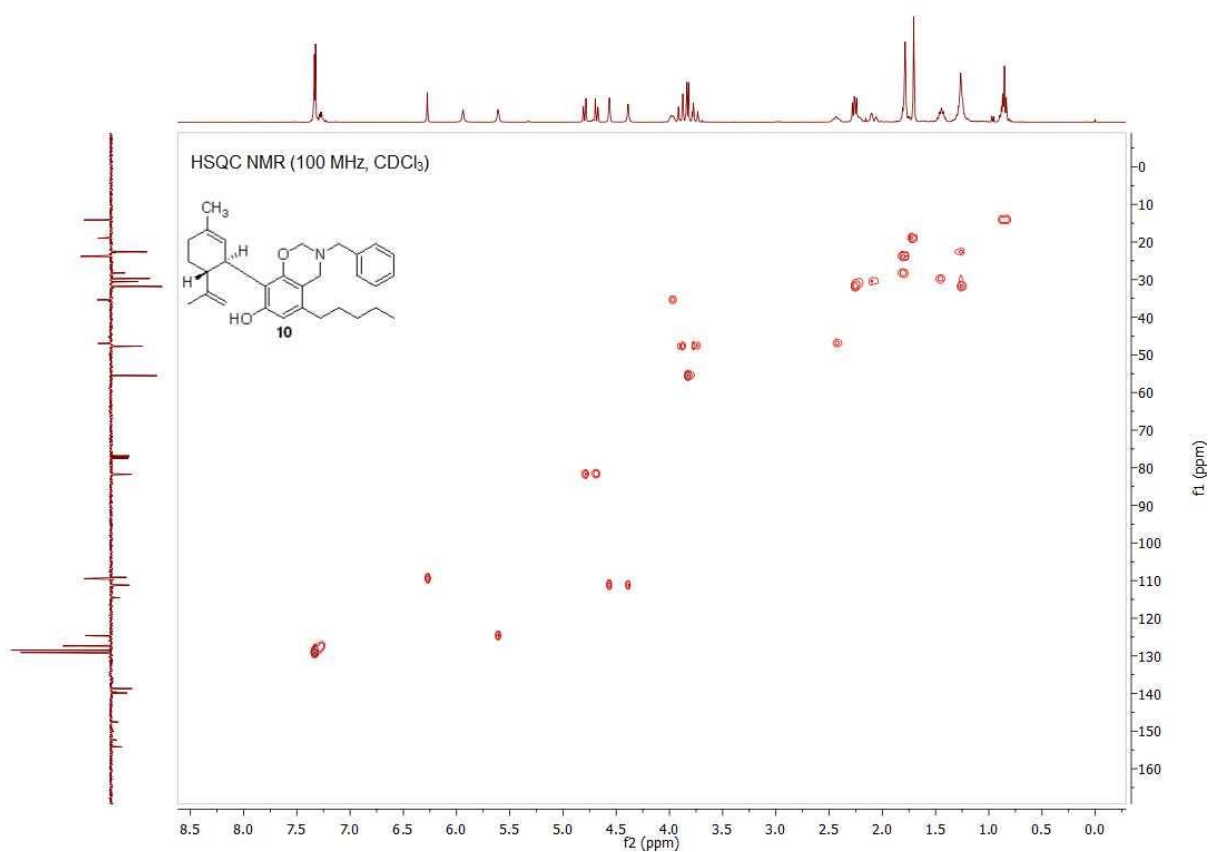

# NMR spectra of compound 11

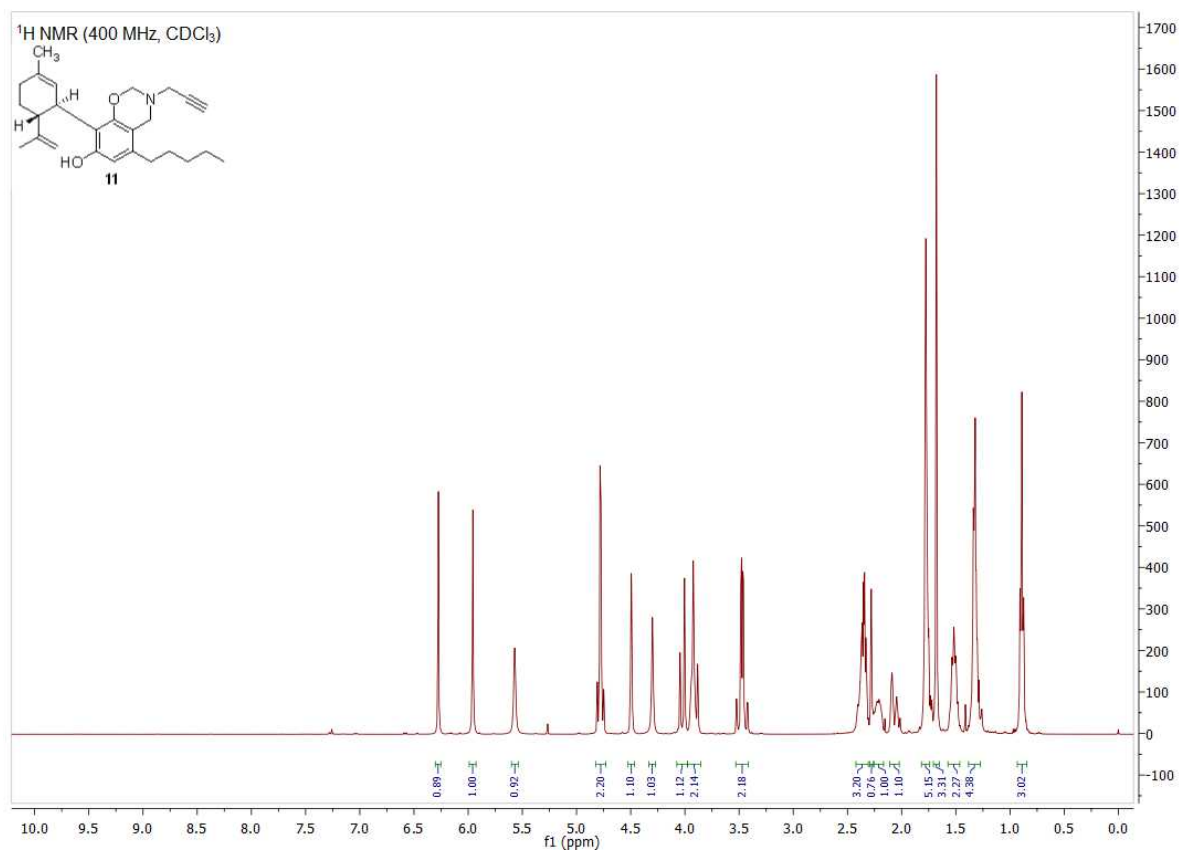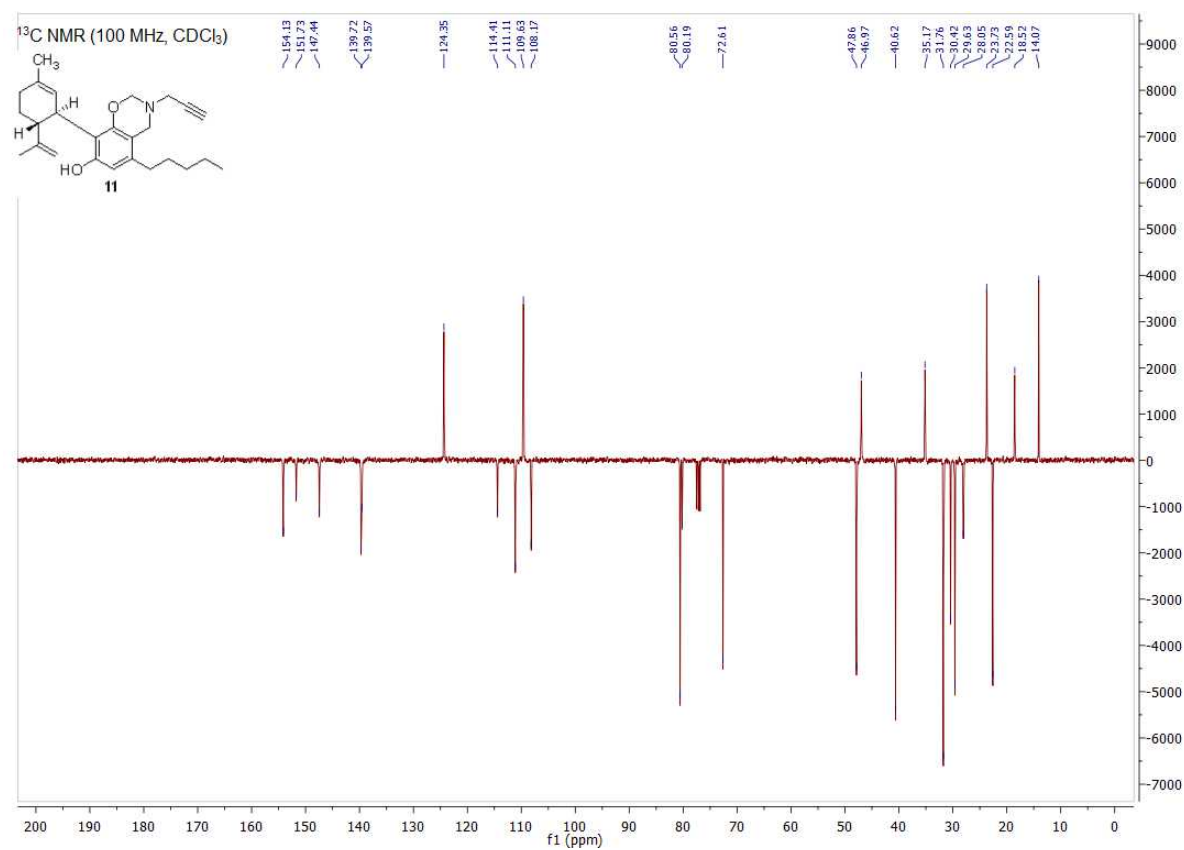

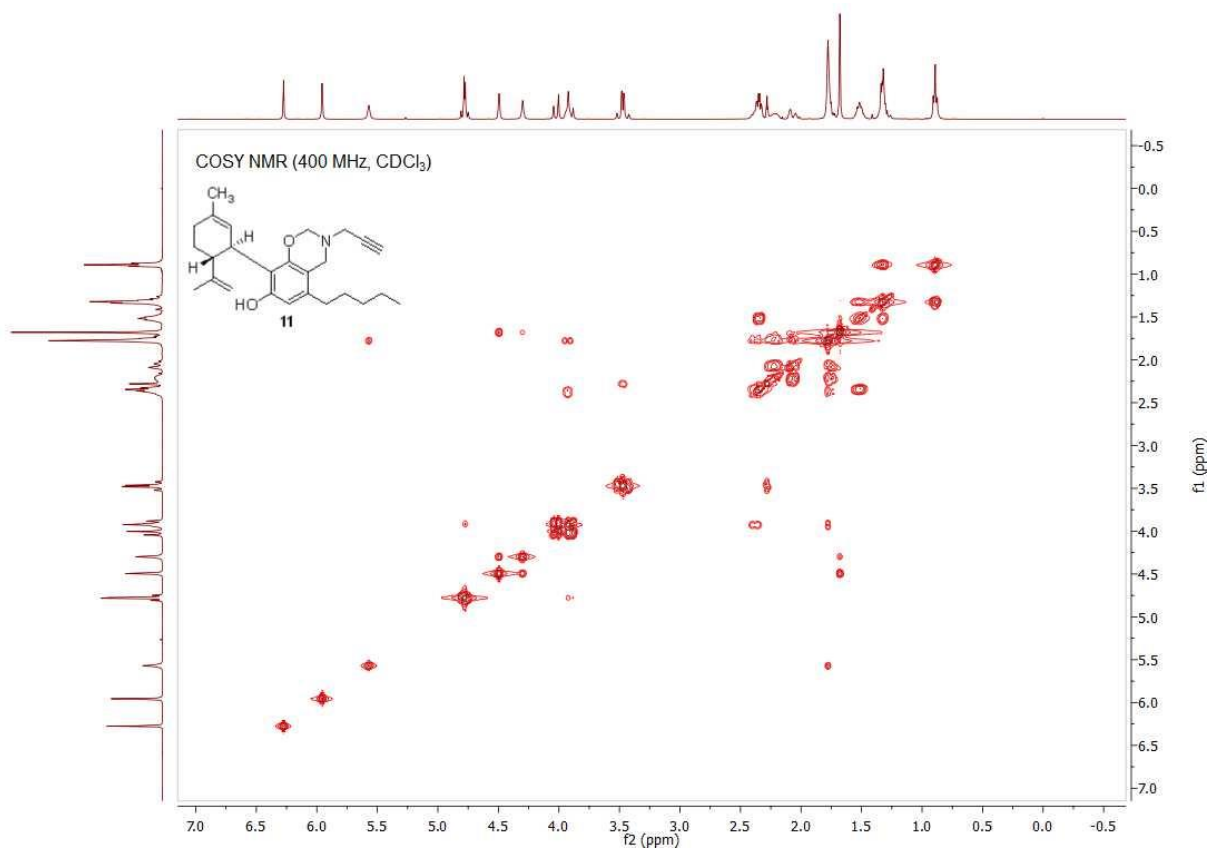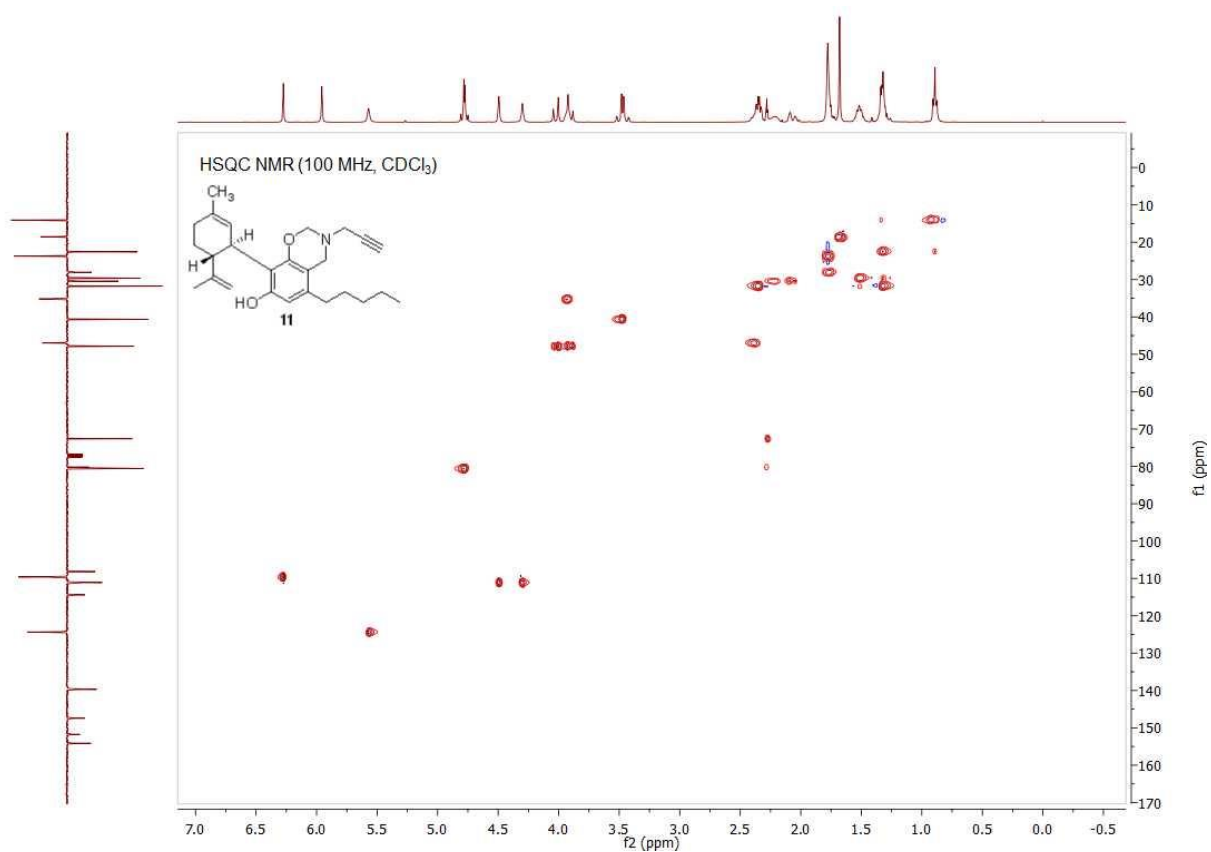

## NMR spectra of compound 12

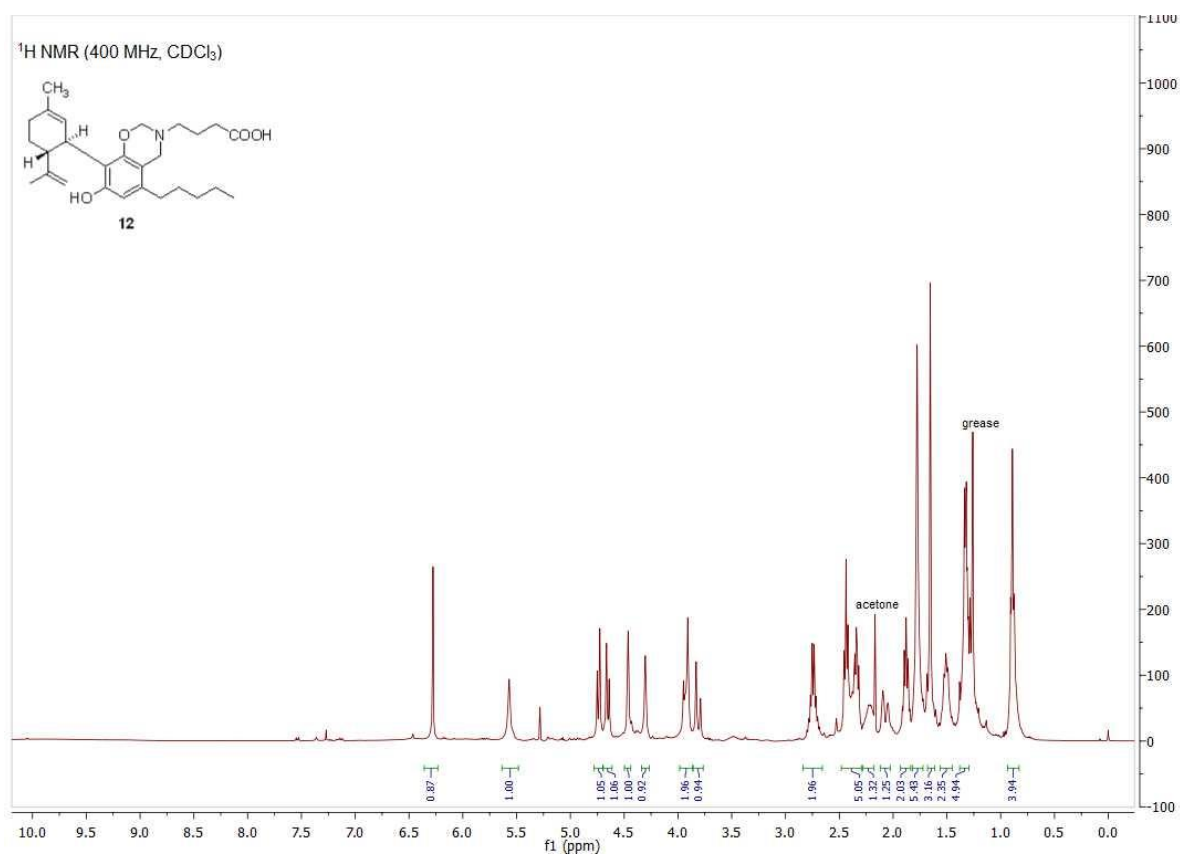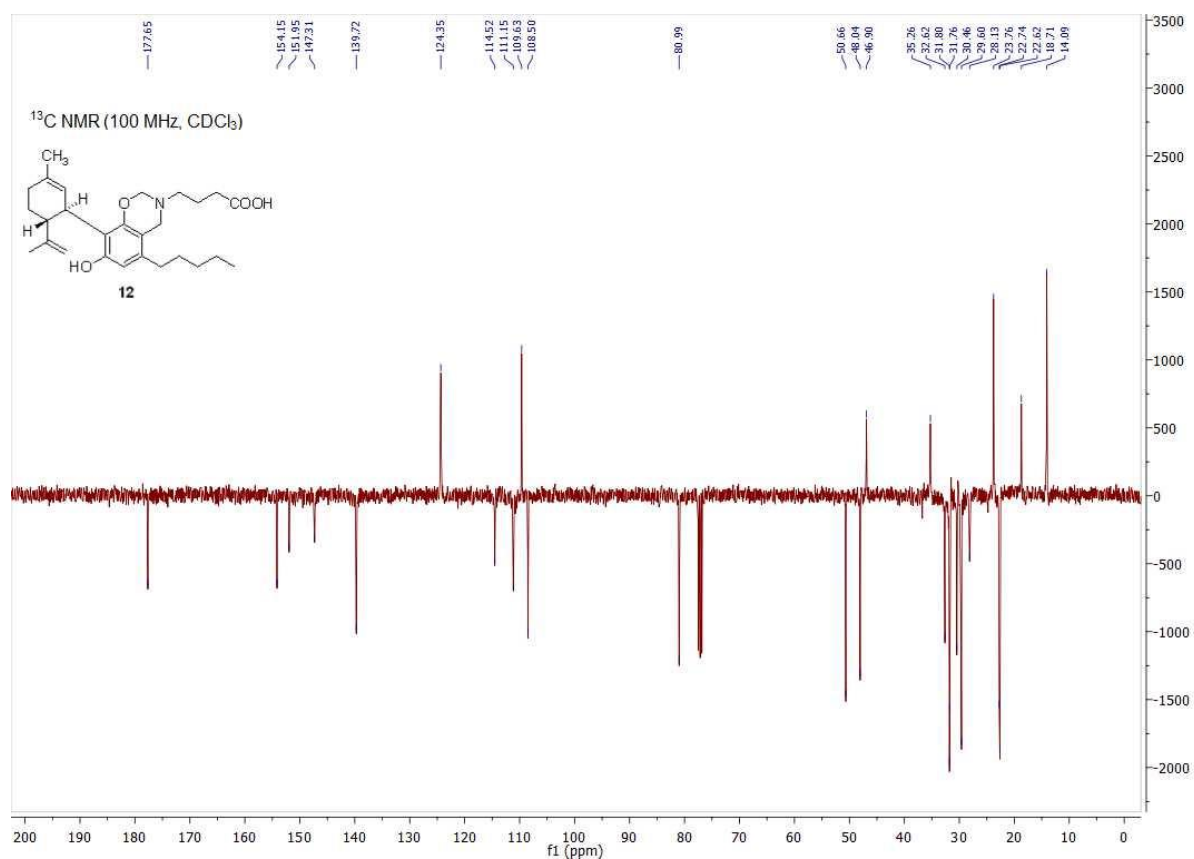

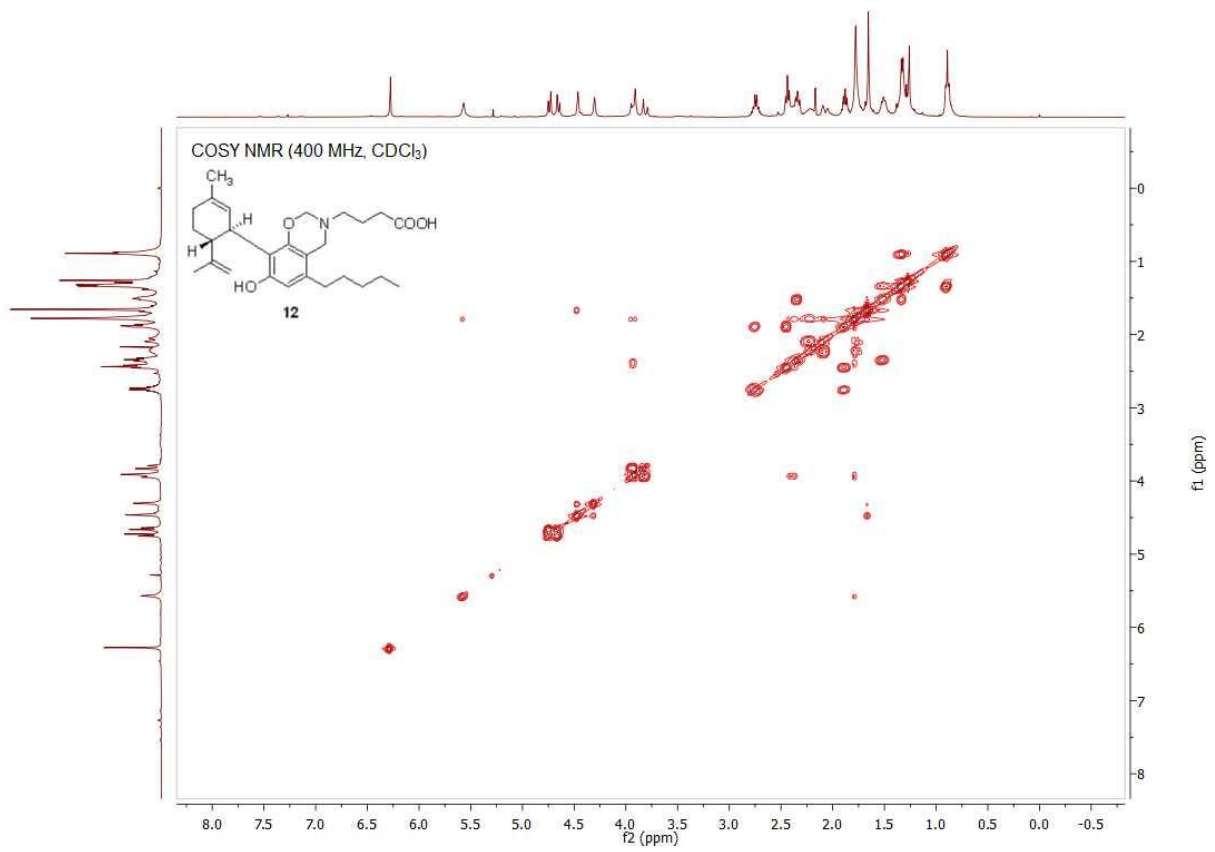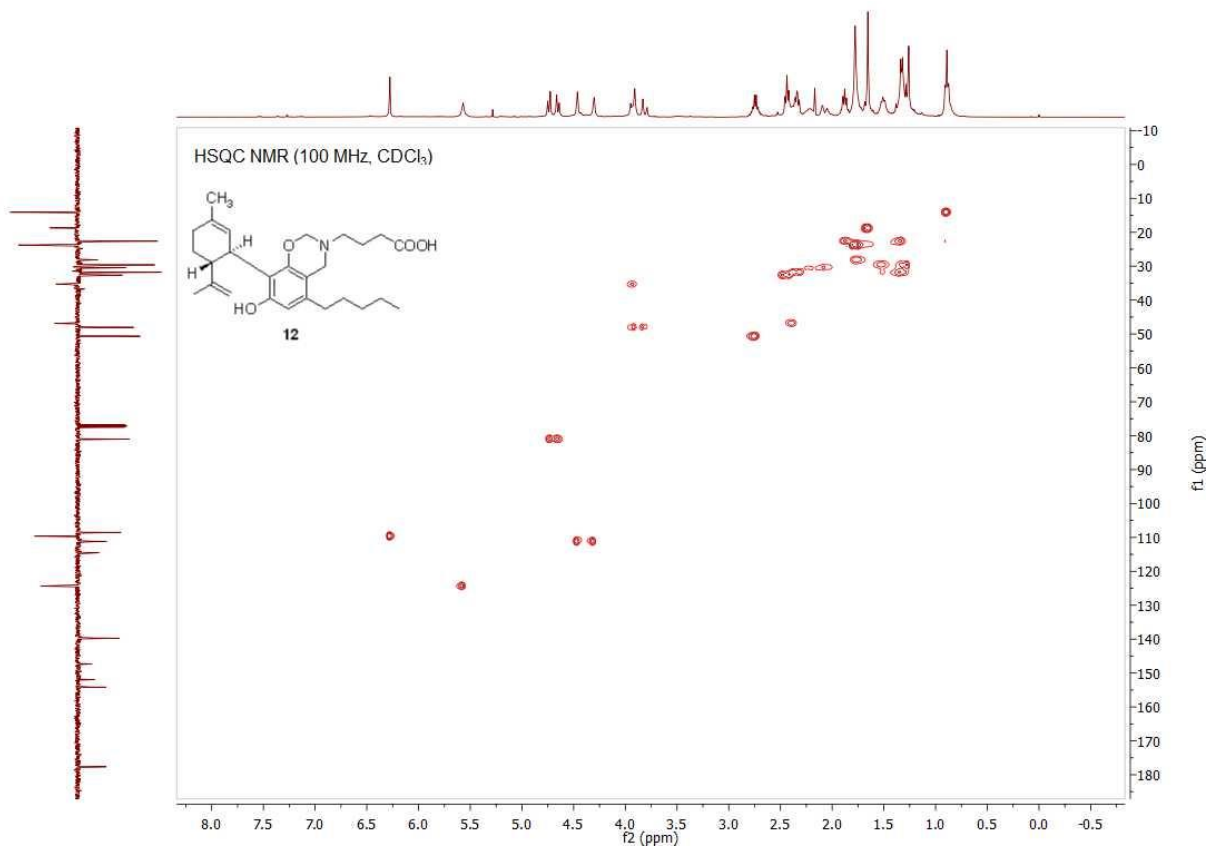

# NMR spectra of compound 13

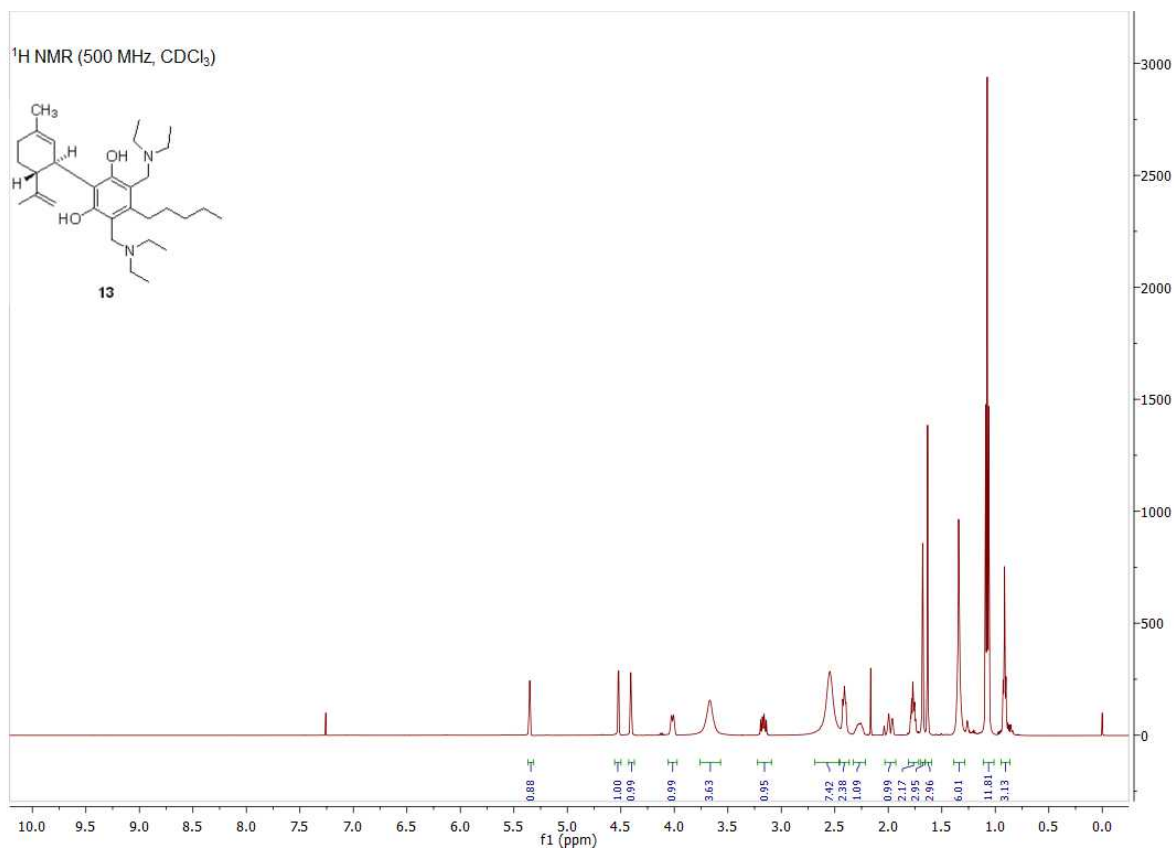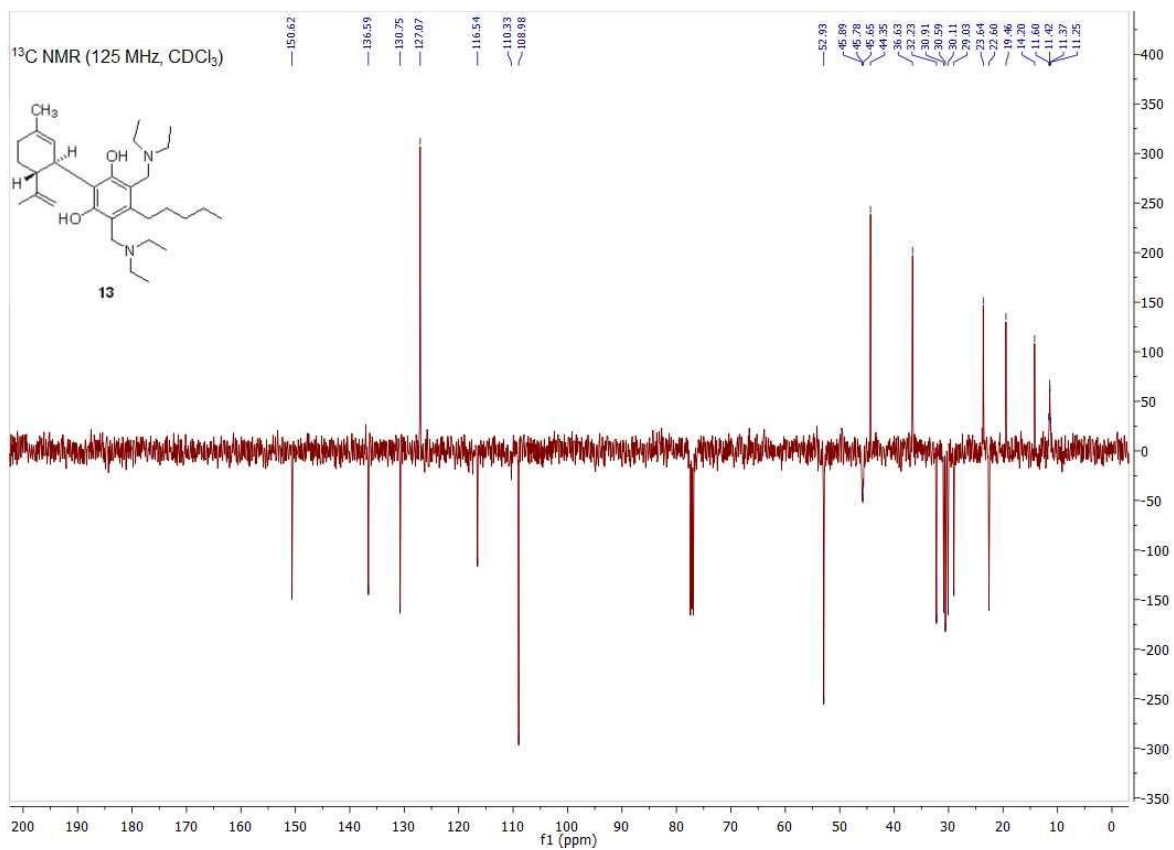

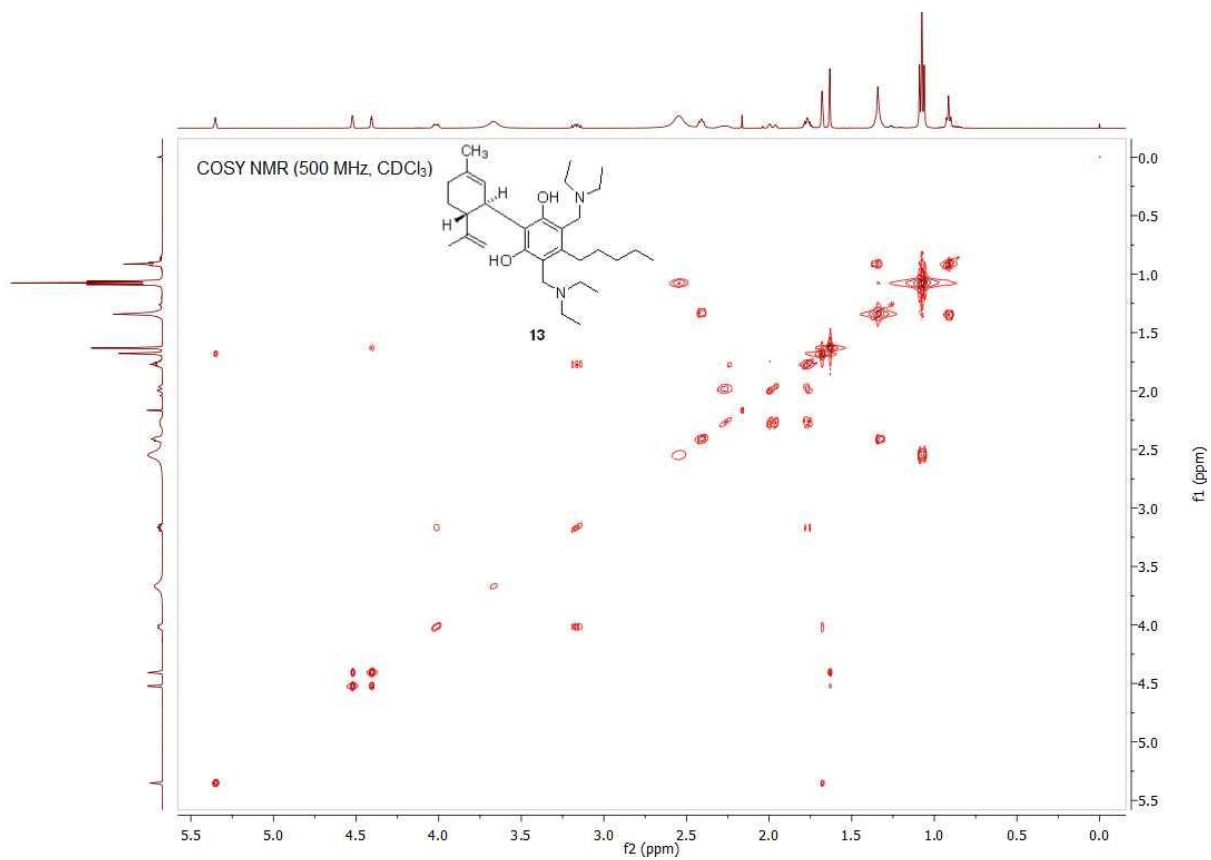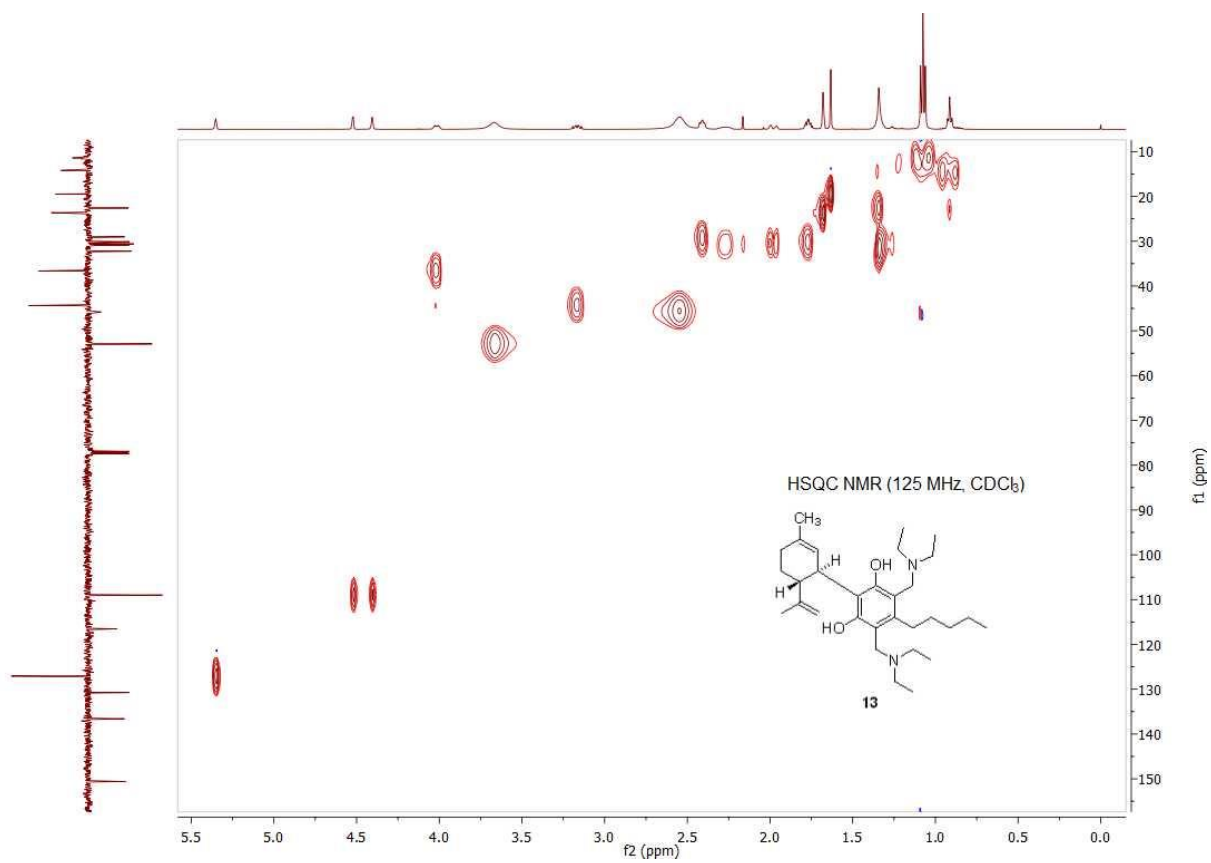

# NMR spectra of compound 14

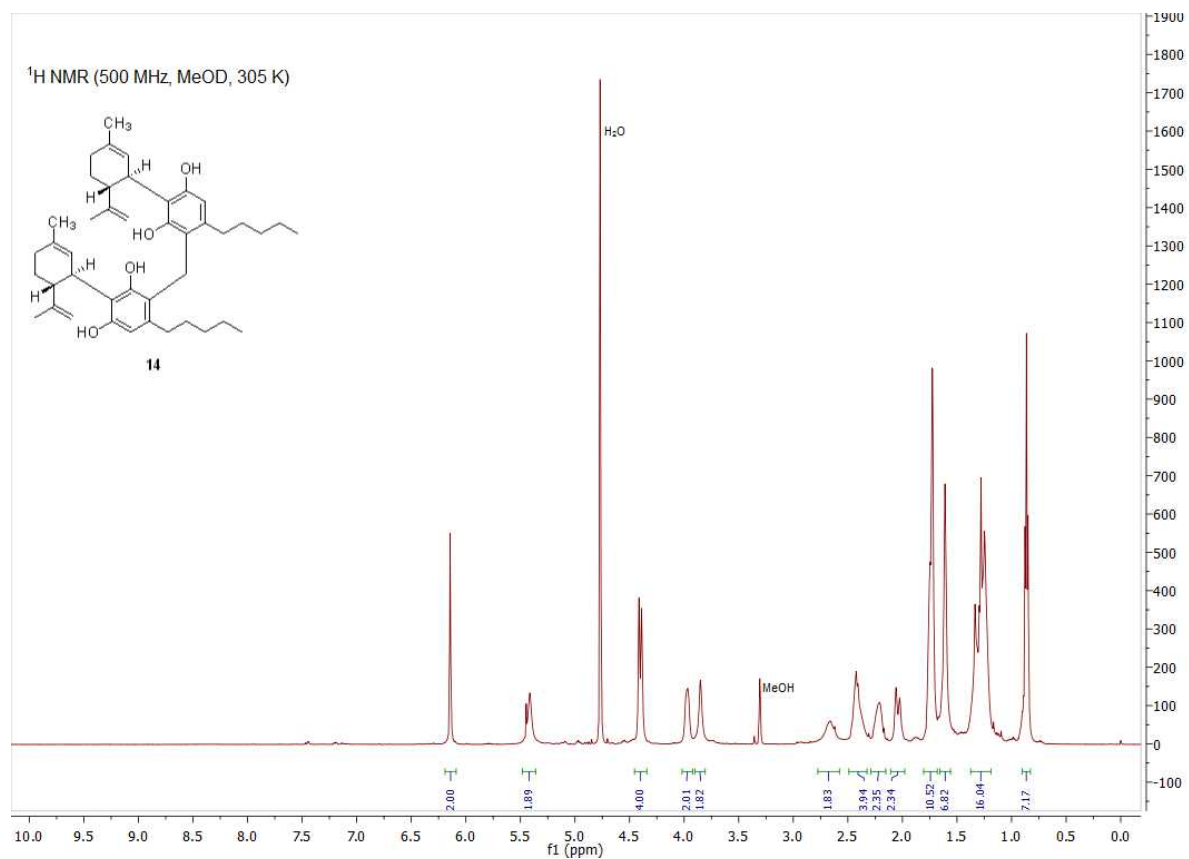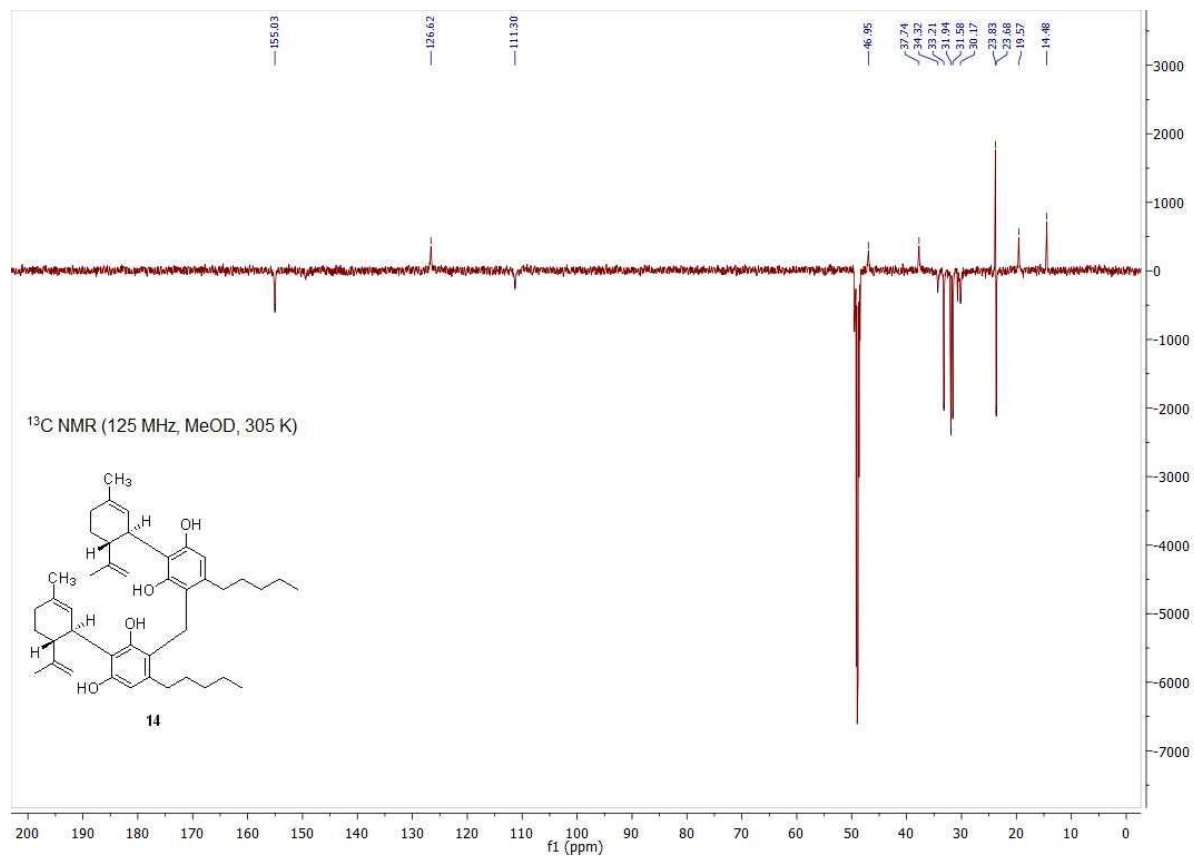

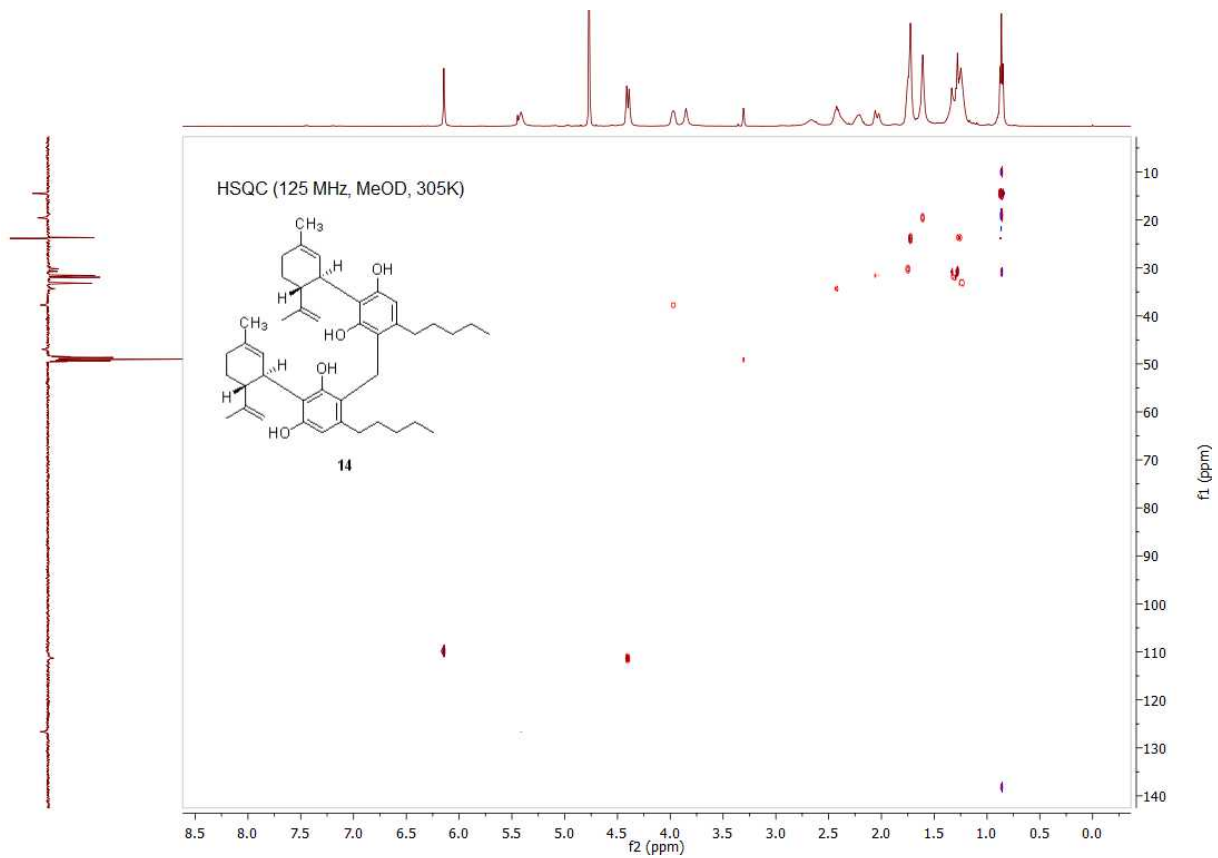

#### 4. NMR data of CBG and its derivatives

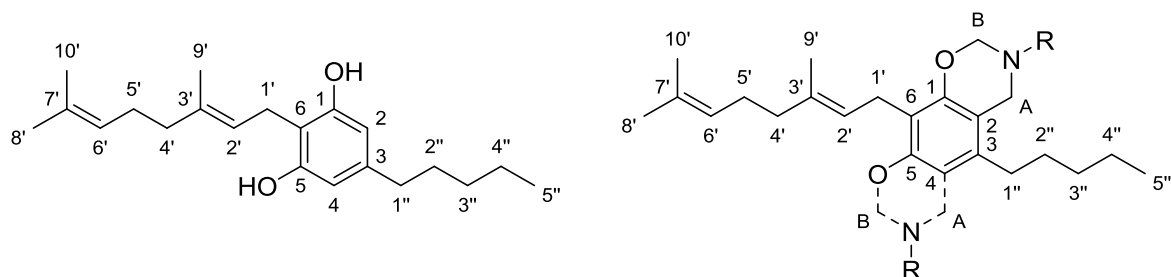

**Figure S3.** Numbering of CBG and its derivatives

##### NMR data of CBG:

$^1\text{H}$  NMR (500 MHz,  $\text{CDCl}_3$ ):  $\delta$  (ppm) 6.24 (s, 2H aromatic CH), 5.29-5.24 (m, 1H, H-2'CH), 5.15 (s, 2H, OH), 5.07-5.02 (m, 1H, H-6' CH), 3.39 (d, 2H,  $J = 7.1$  Hz, H-1'  $\text{CH}_2$ ), 2.46-2.41 (m, 2H, H-1''  $\text{CH}_2$ ), 2.13-2.07 (m, 2H, H-5'  $\text{CH}_2$ ), 2.07-2.02 (m, 2H, H-4'  $\text{CH}_2$ ), 1.80 (s, 3H, H-9'  $\text{CH}_3$ ), 1.58, 1.67 (2s, 6H, H-8' and H-10'  $\text{CH}_3$ ), 1.57-1.51 (m, 2H, H-2''  $\text{CH}_2$ ), 1.36-1.24 (m, 4H, H-3'' and H-4''  $\text{CH}_2$ ), 0.88 (t, 3H,  $J = 6.9$  Hz, H-5''  $\text{CH}_3$ );  $^{13}\text{C}$  NMR (125 MHz,  $\text{CDCl}_3$ ):  $\delta$  (ppm) 154.9, 142.9, 139.1, 132.2 (4C, quat.), 123.9 (1C, C-6' CH), 121.9 (1C, C-2' CH), 110.8 (1C, quat.), 108.5 (2C, aromatic CH), 39.8 (1C, C-4'  $\text{CH}_2$ ), 35.7 (1C, C-1''  $\text{CH}_2$ ), 31.6 (1C, C-3''  $\text{CH}_2$ ), 30.9 (1C, C-2''  $\text{CH}_2$ ), 26.5 (1C, C-5'  $\text{CH}_2$ ), 25.8 (1C, C-8' or C-10'  $\text{CH}_3$ ), 22.7 (1C, C-4''  $\text{CH}_2$ ), 22.4 (1C, C-1'  $\text{CH}_2$ ), 17.8 (1C, C-8' or C-10'  $\text{CH}_3$ ), 16.3 (1C, C-9'  $\text{CH}_3$ ), 14.1 (1C, C-5''  $\text{CH}_3$ ).

# NMR spectra of CBG

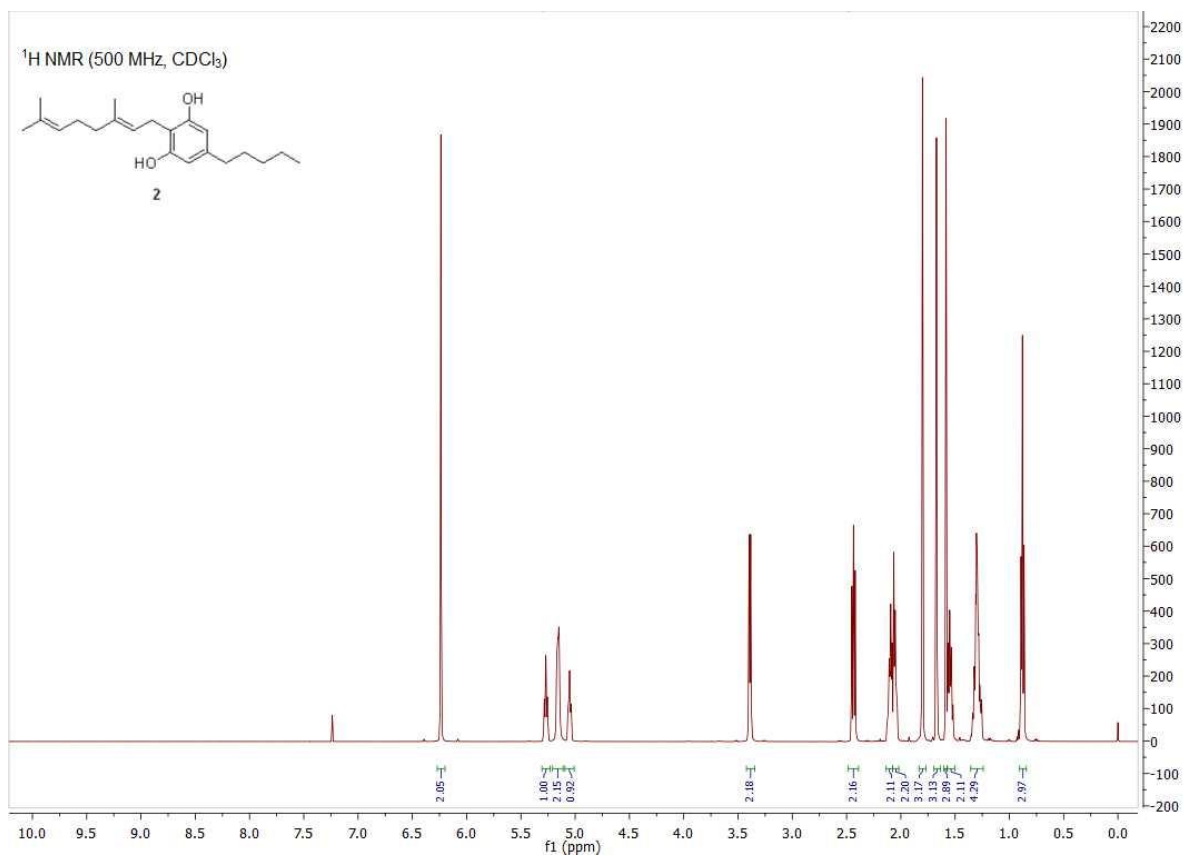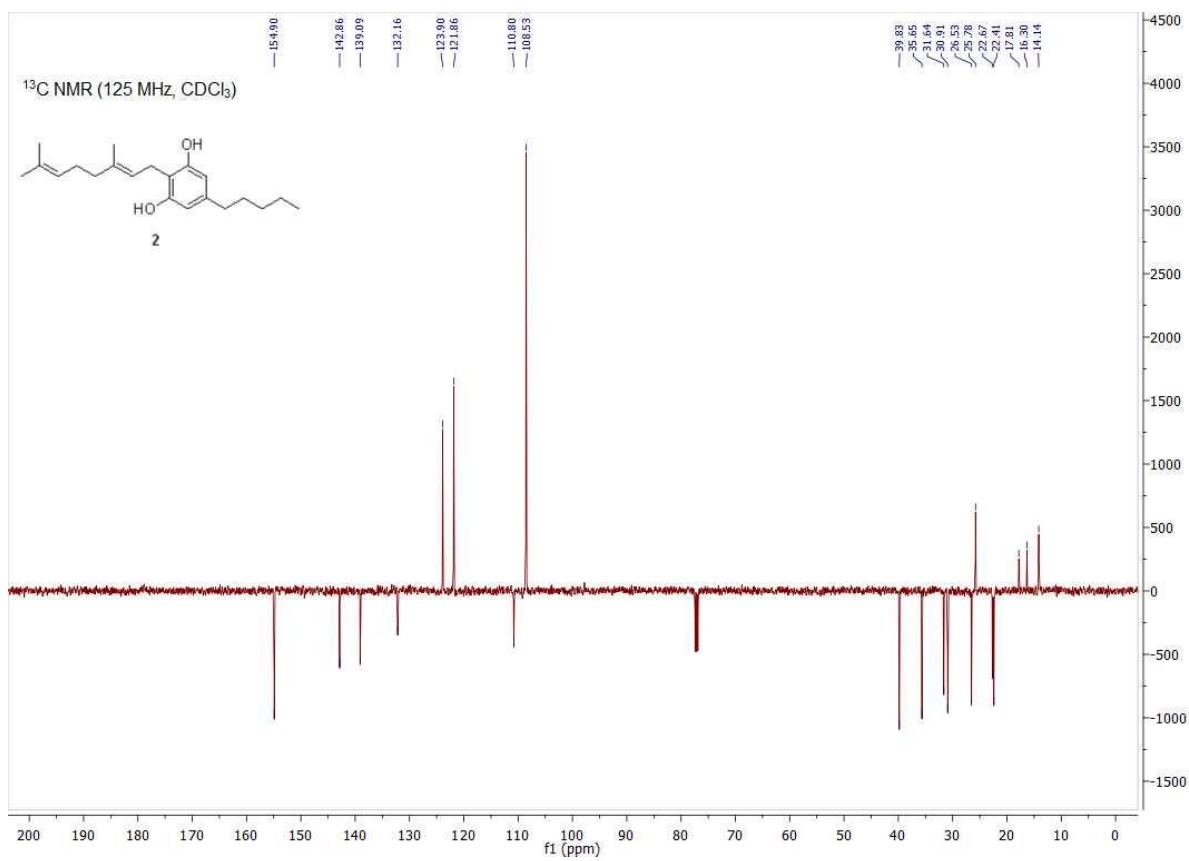

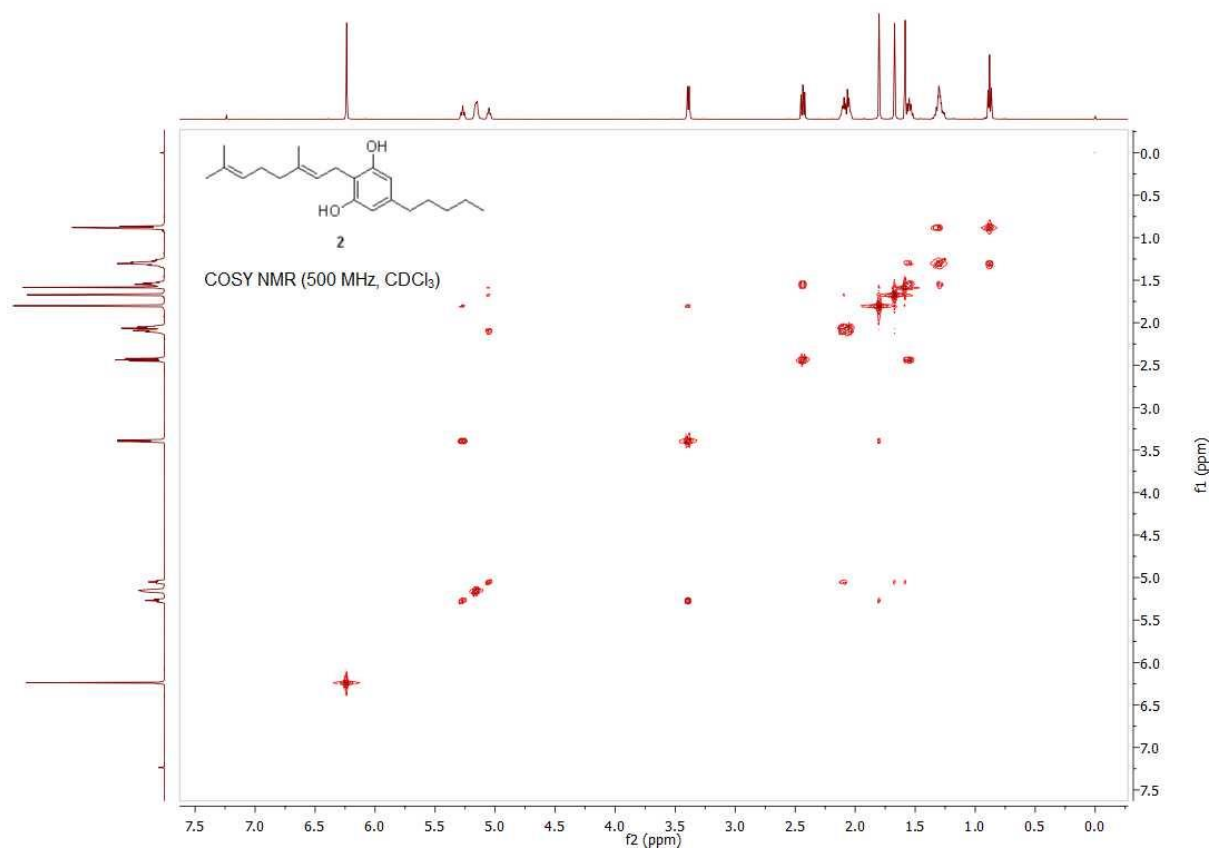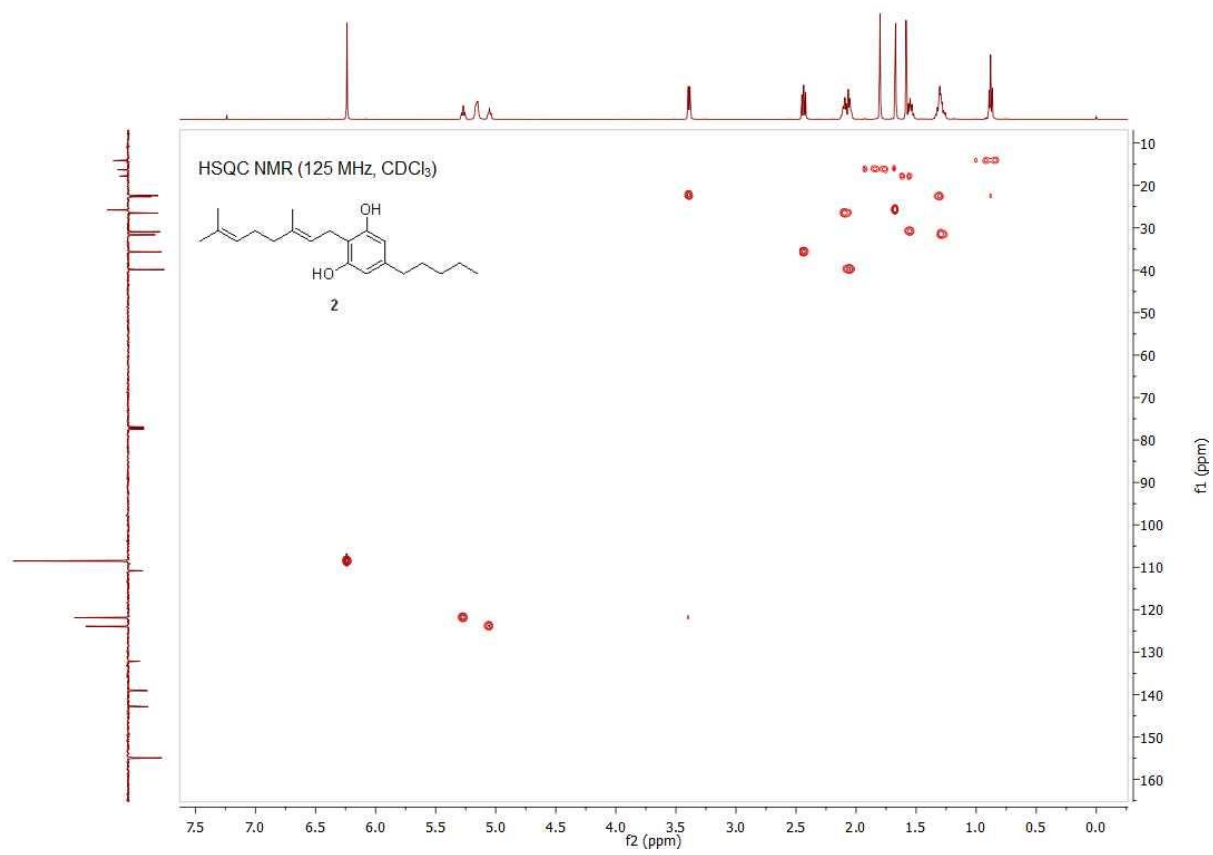

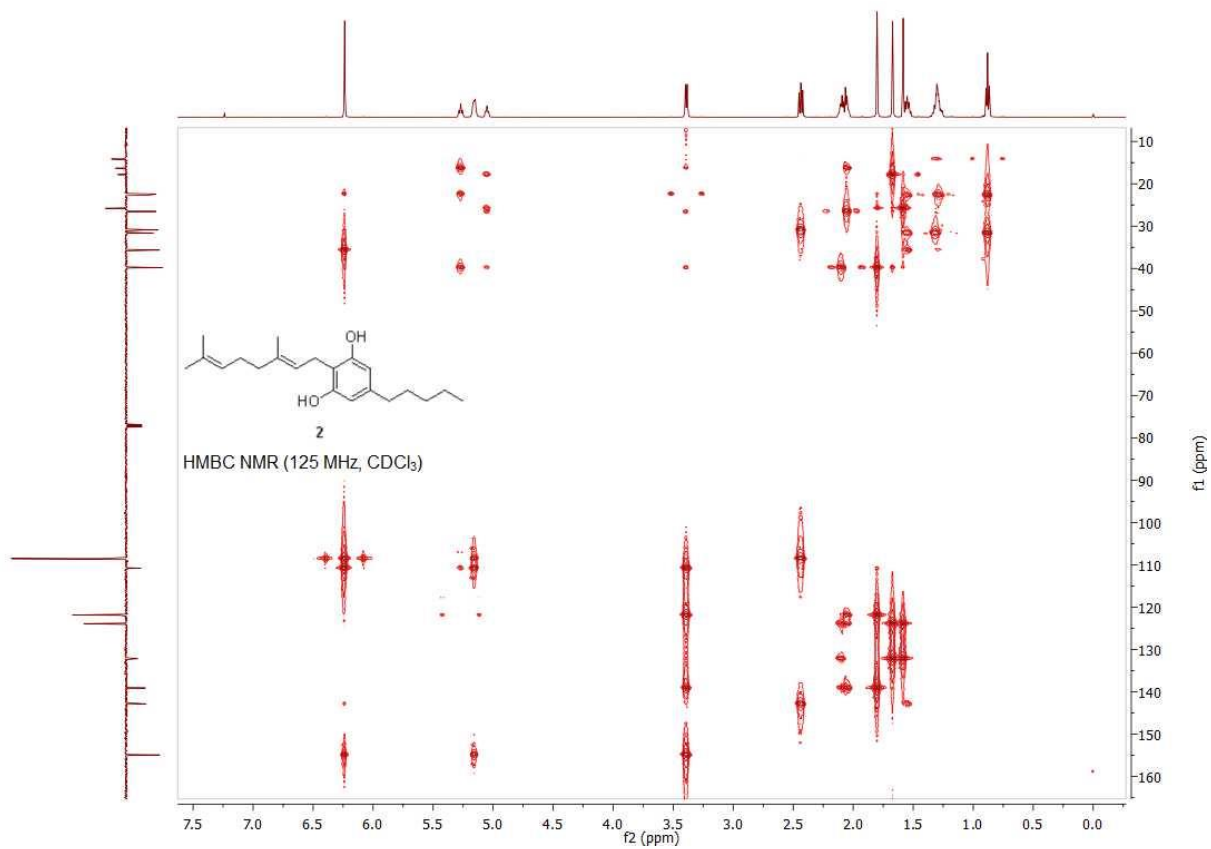



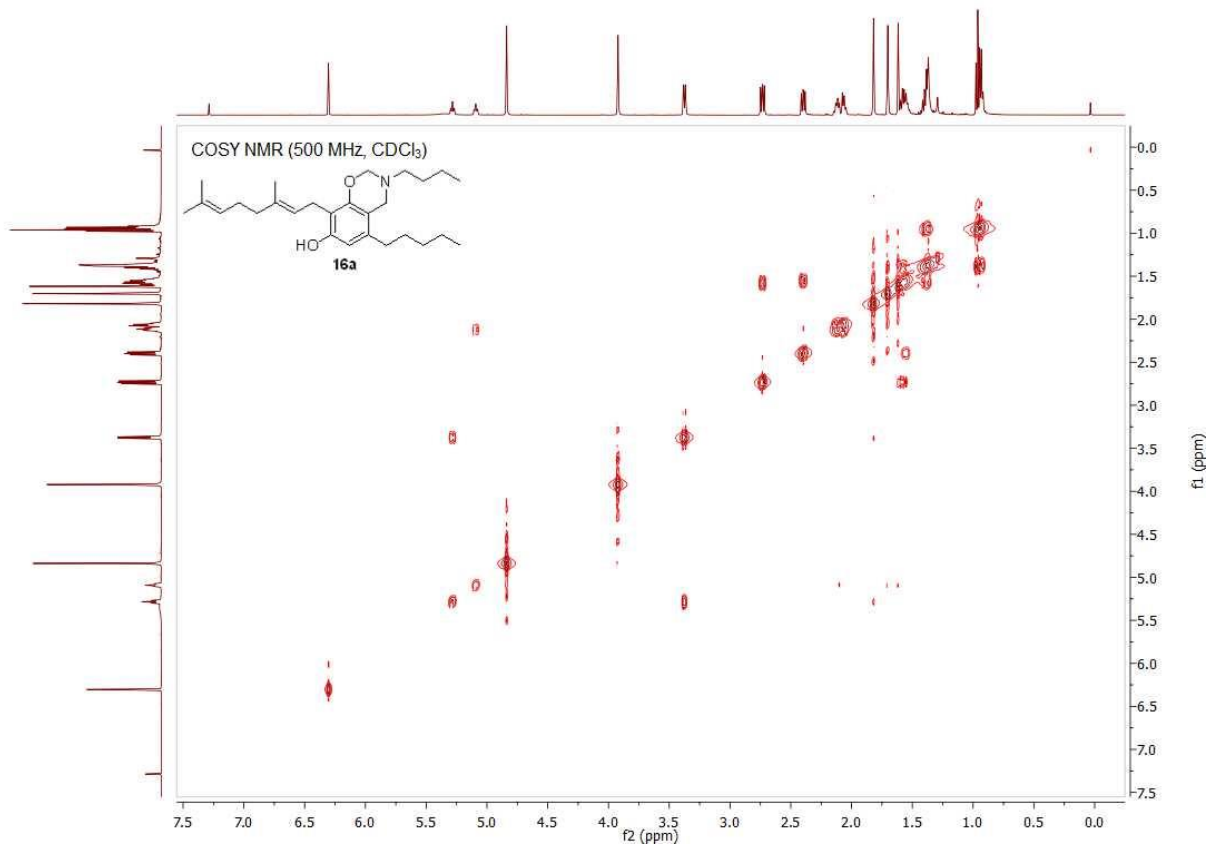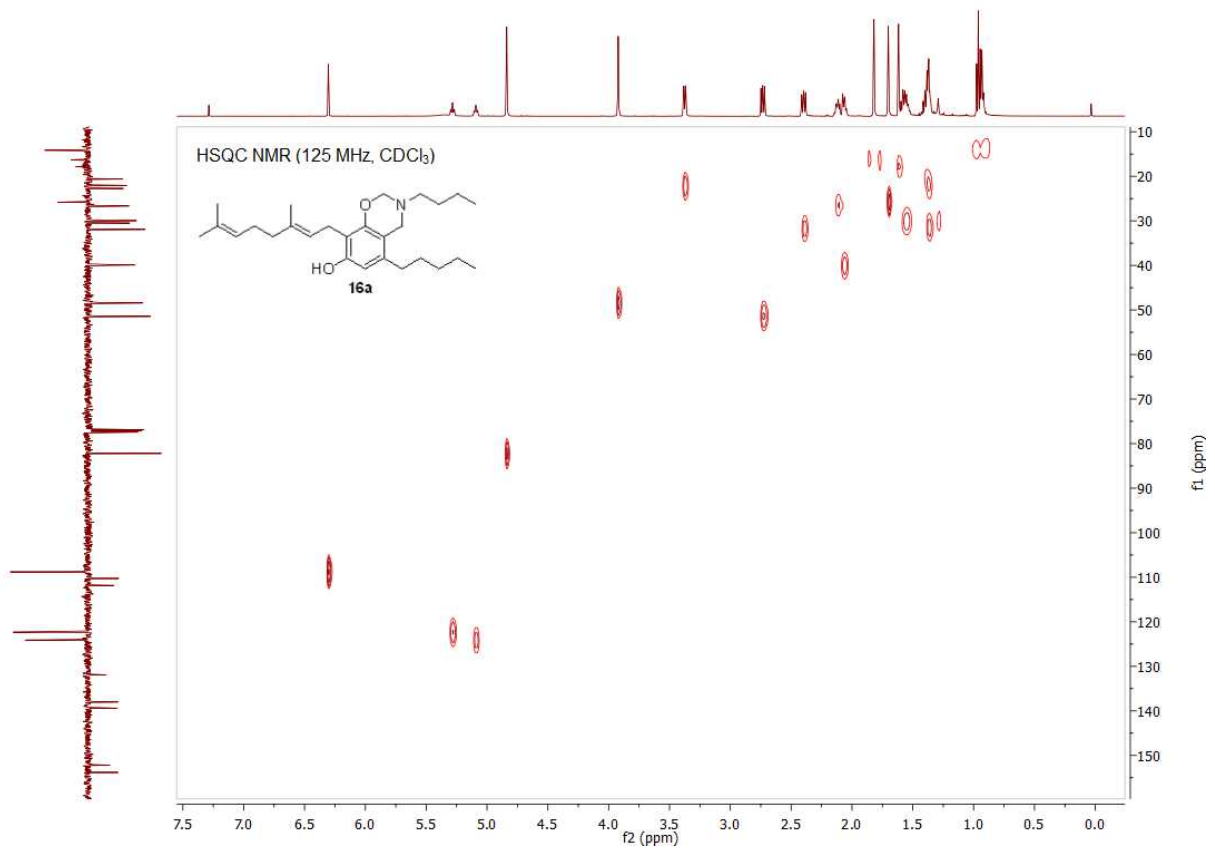

# NMR spectra of compound 16b

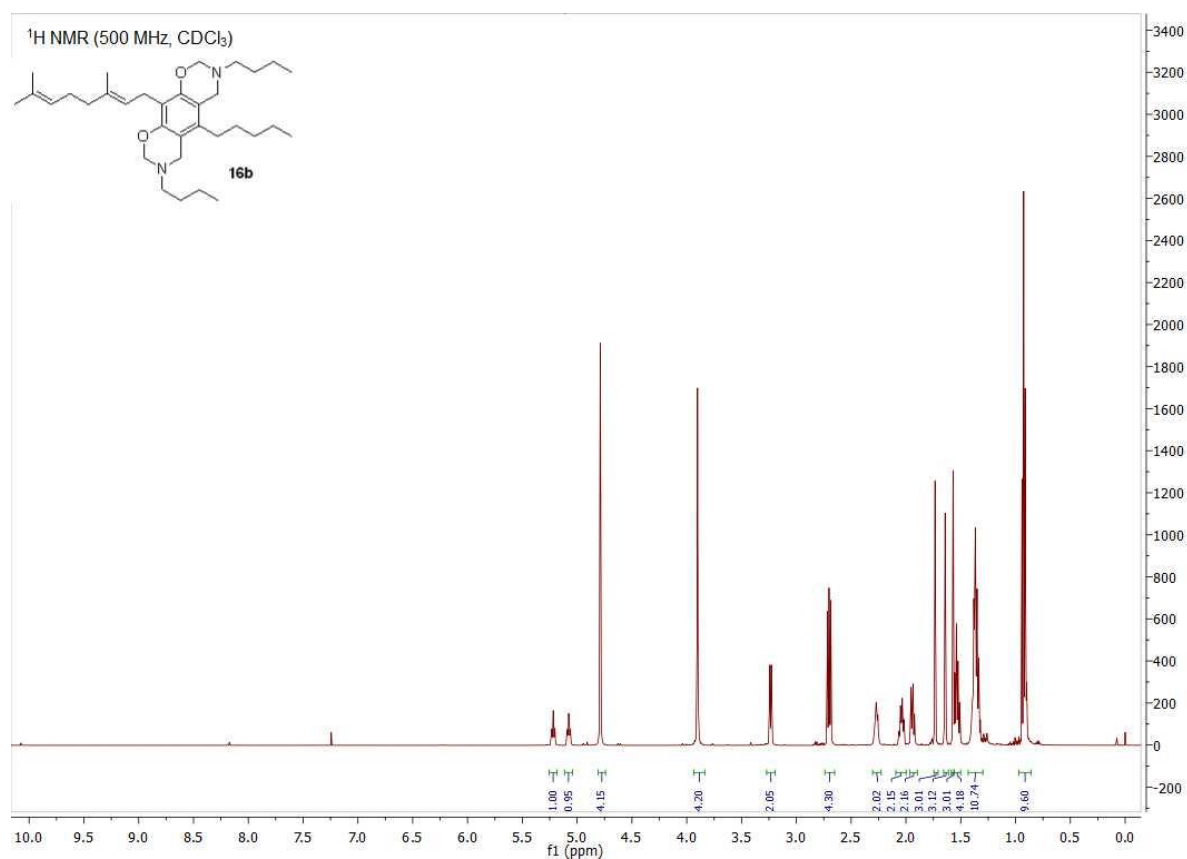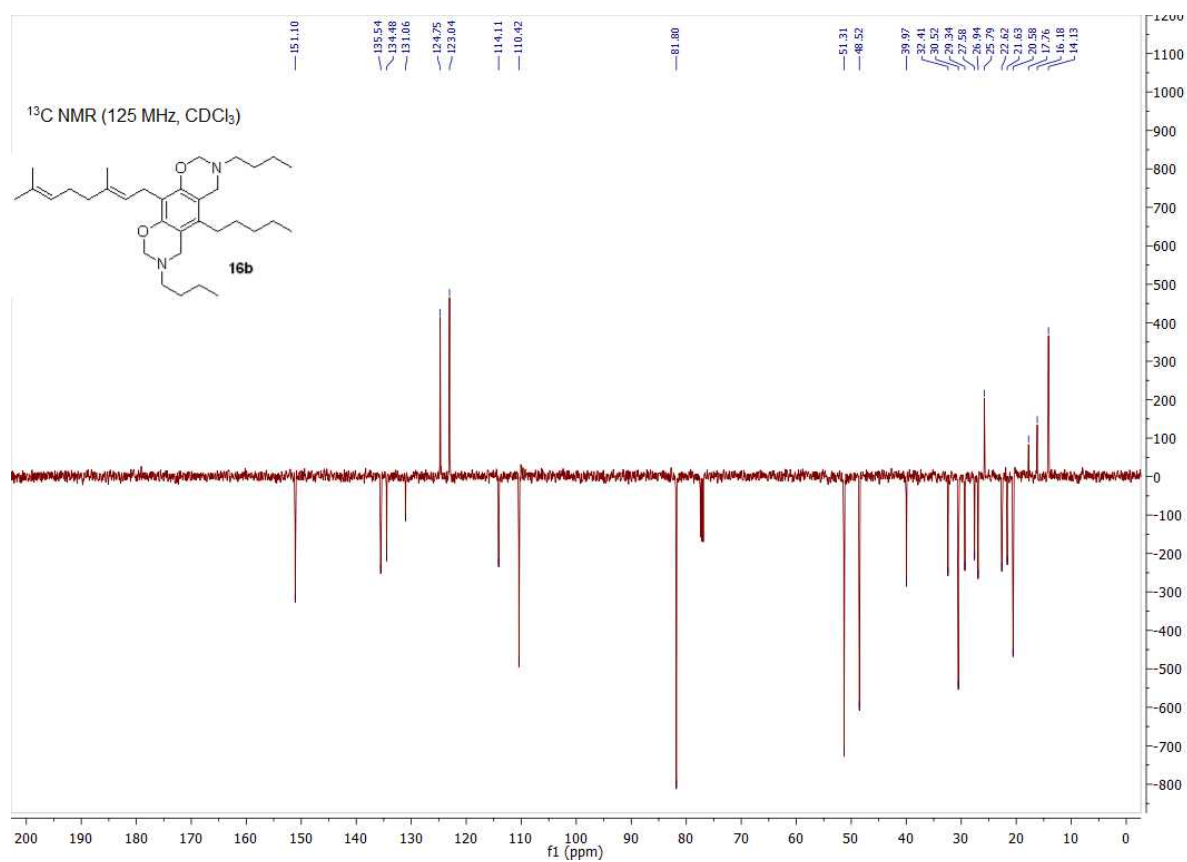

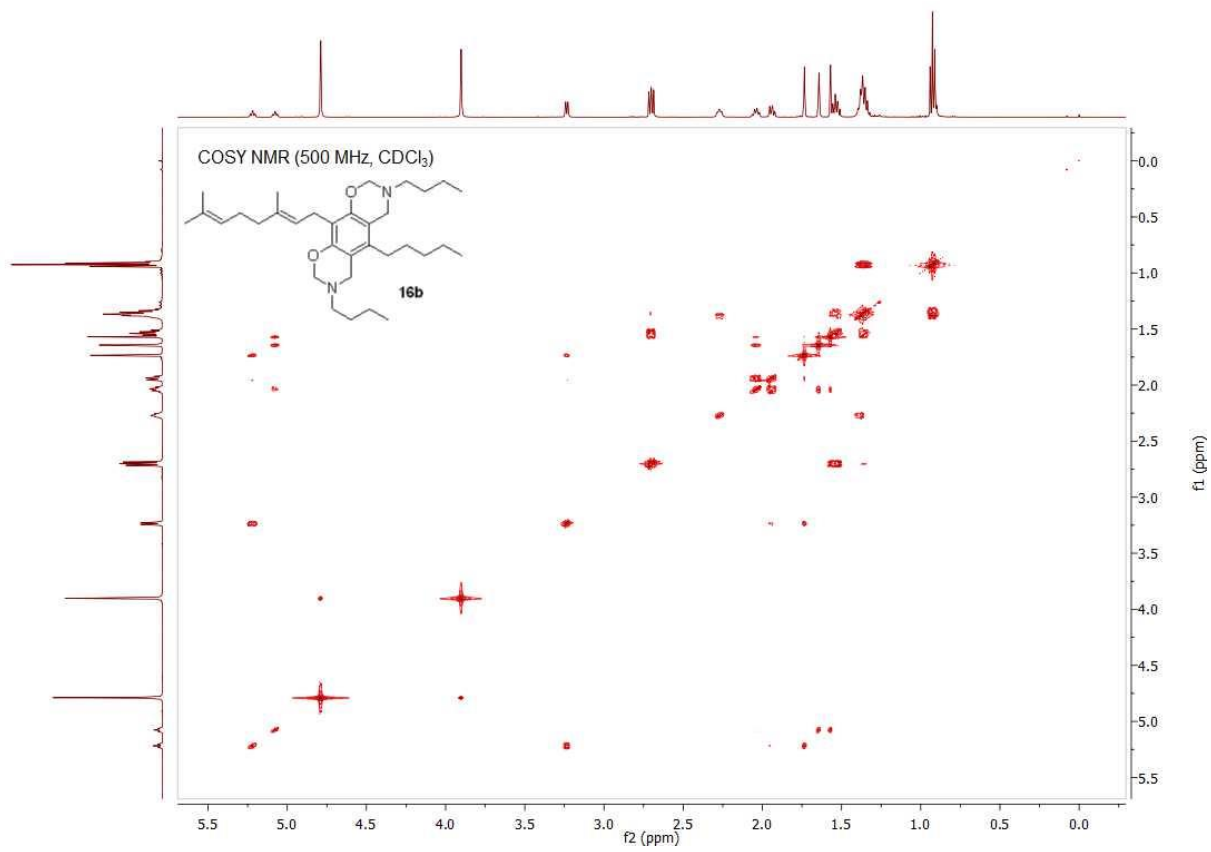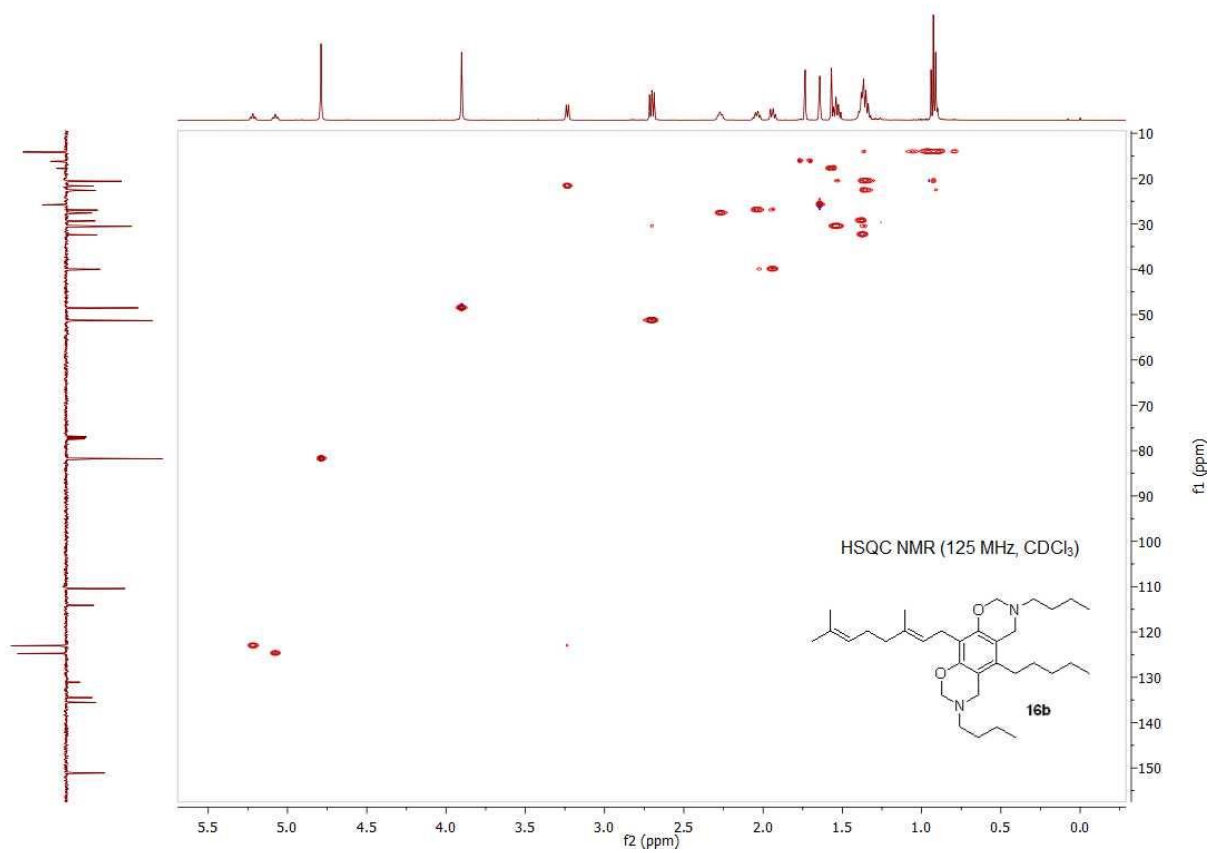

# NMR spectra of compound 17a

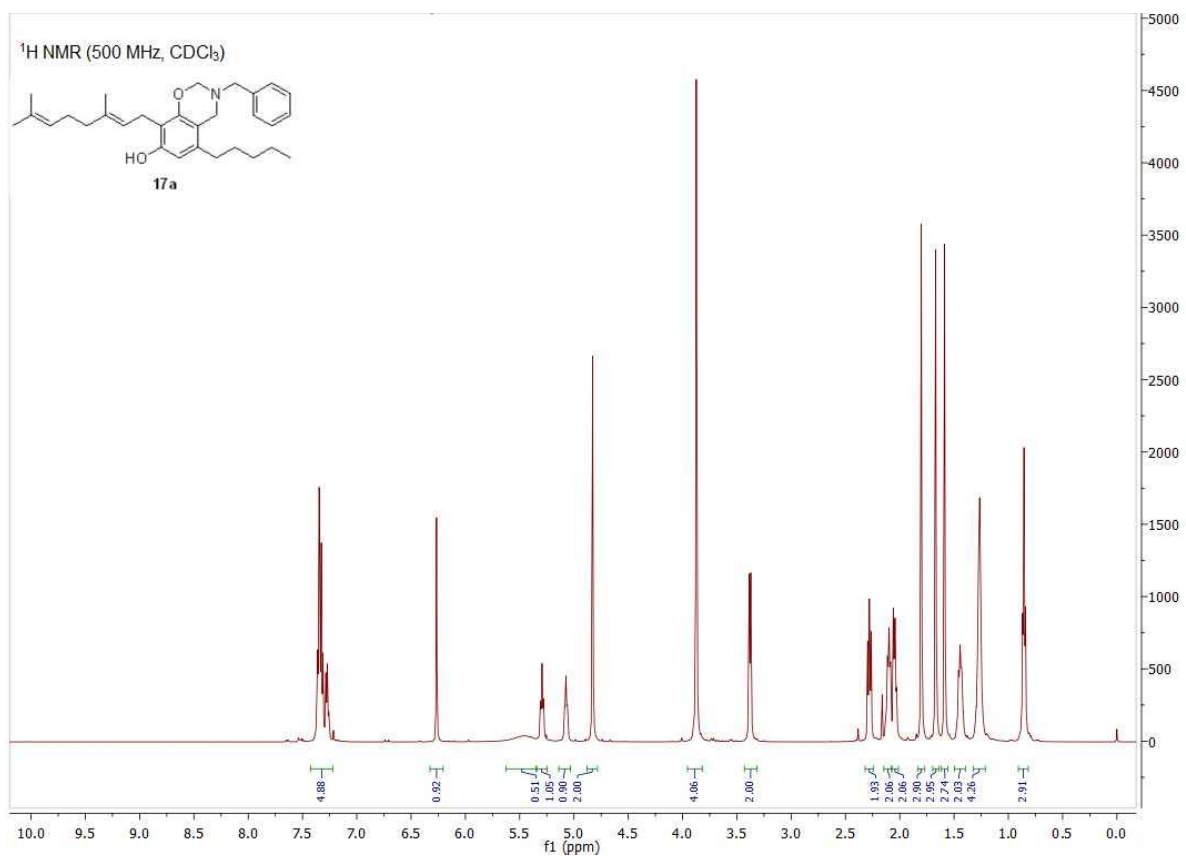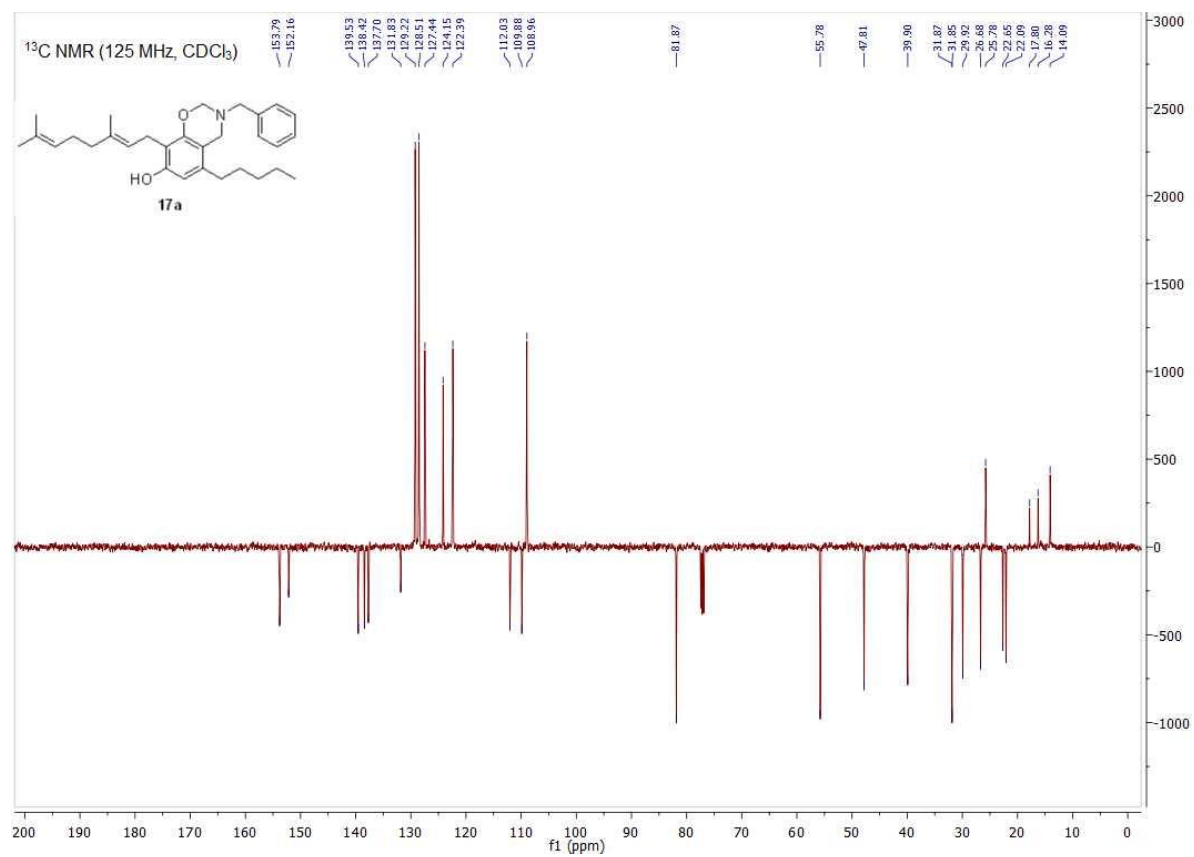

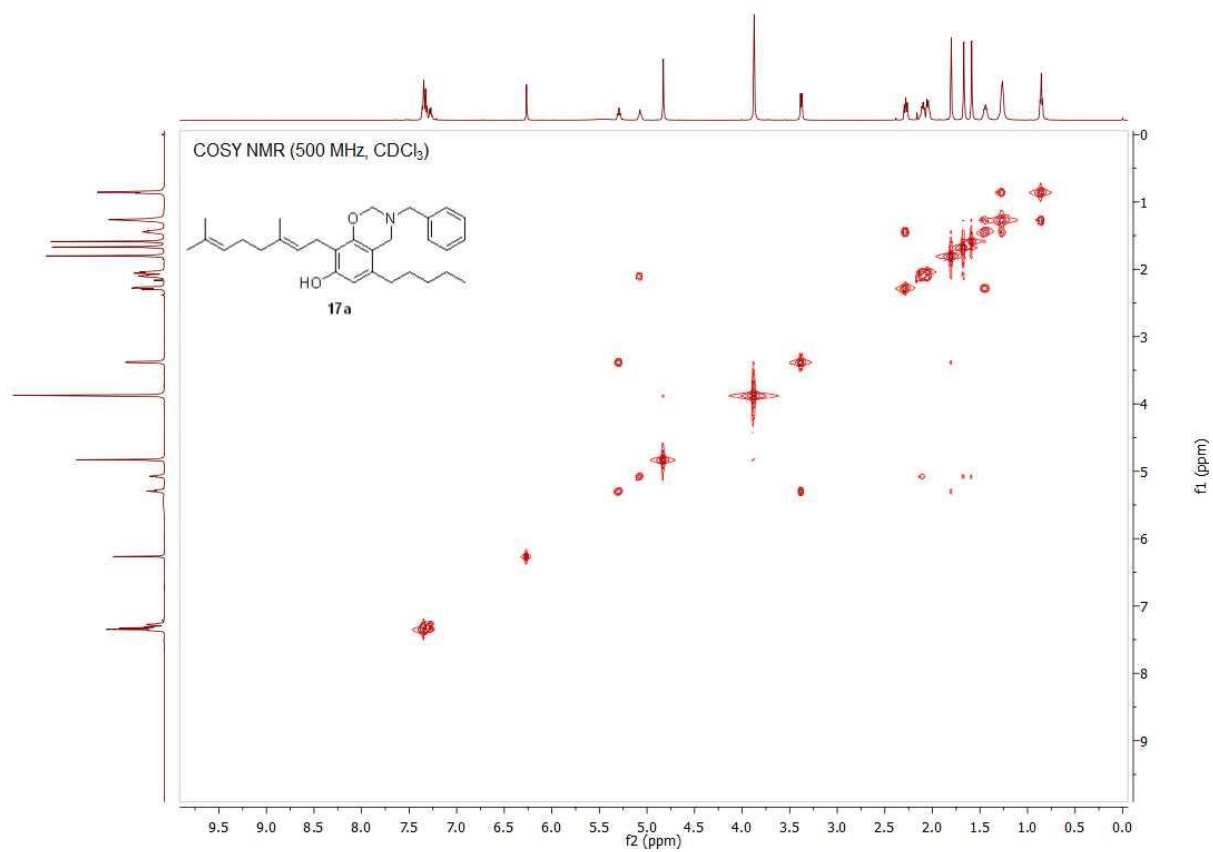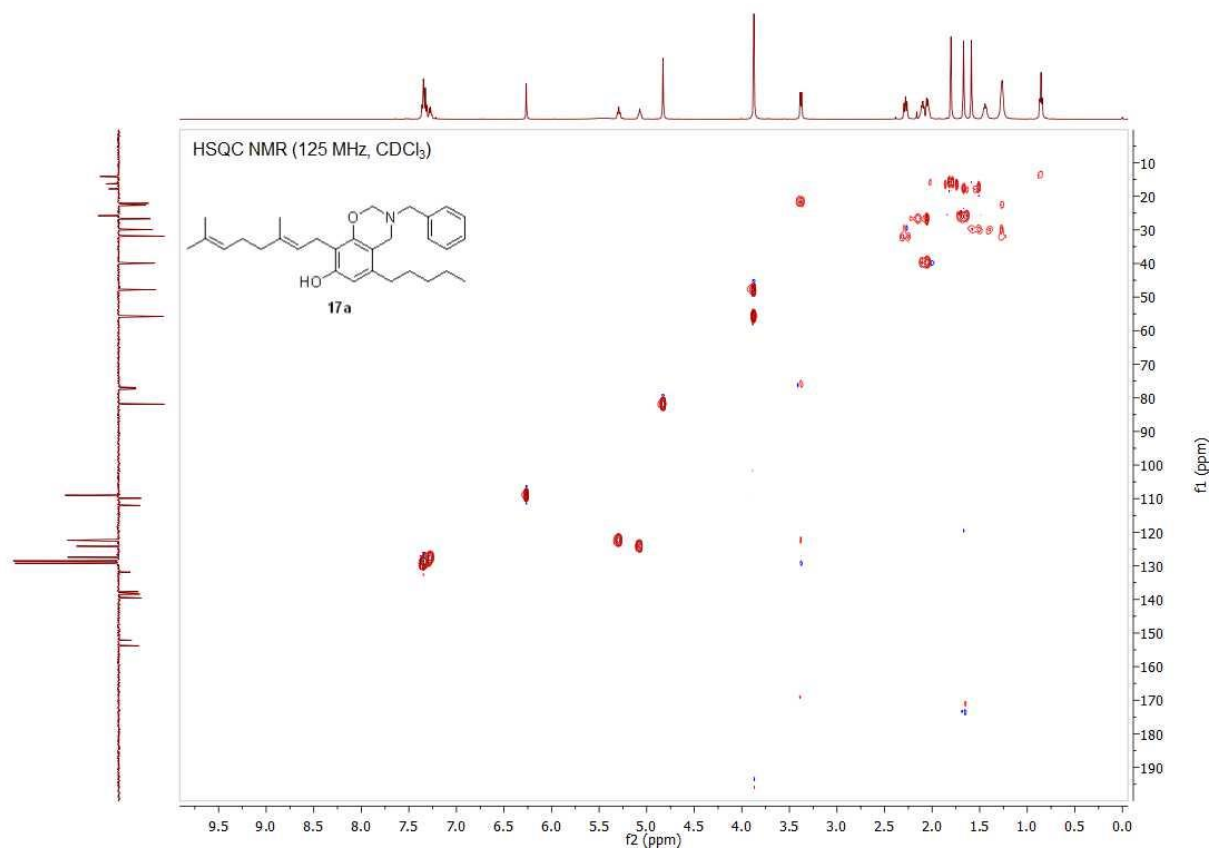

# NMR spectra of compound 17b

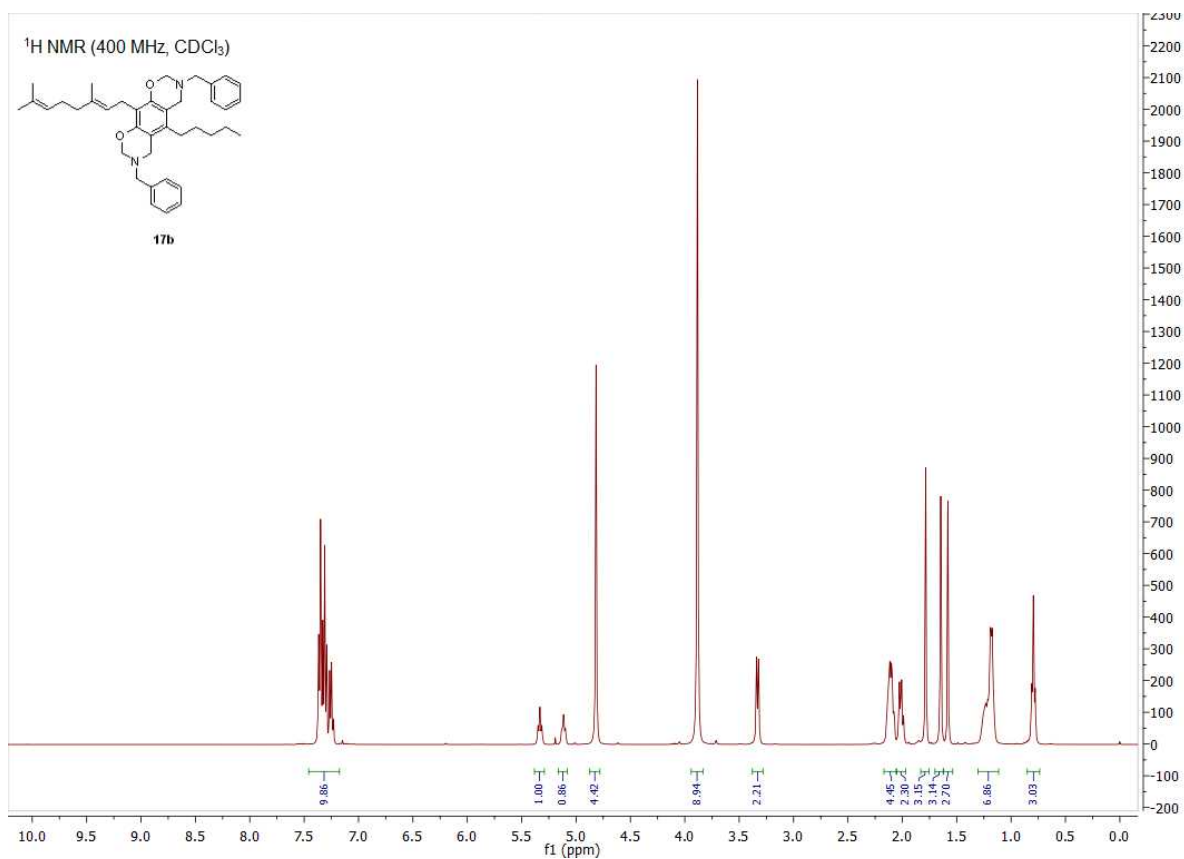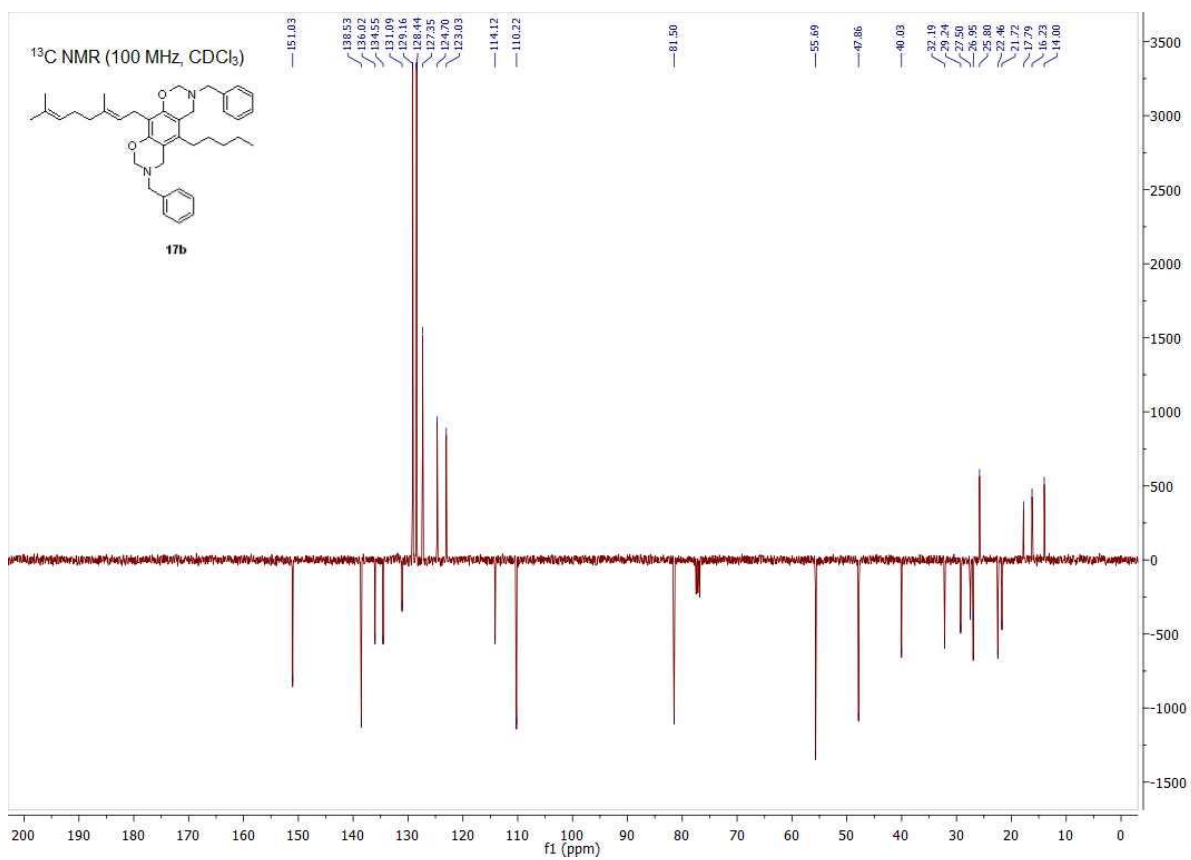



# NMR spectra of compound 18

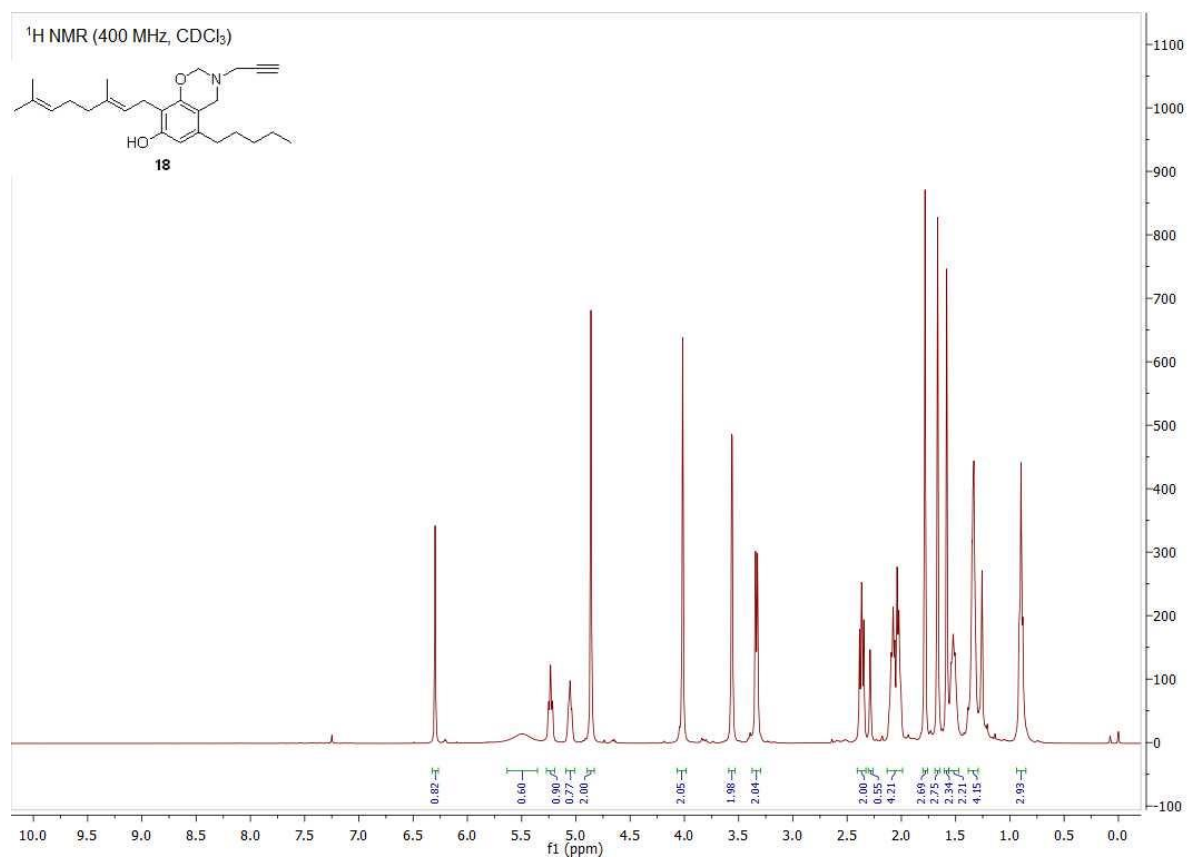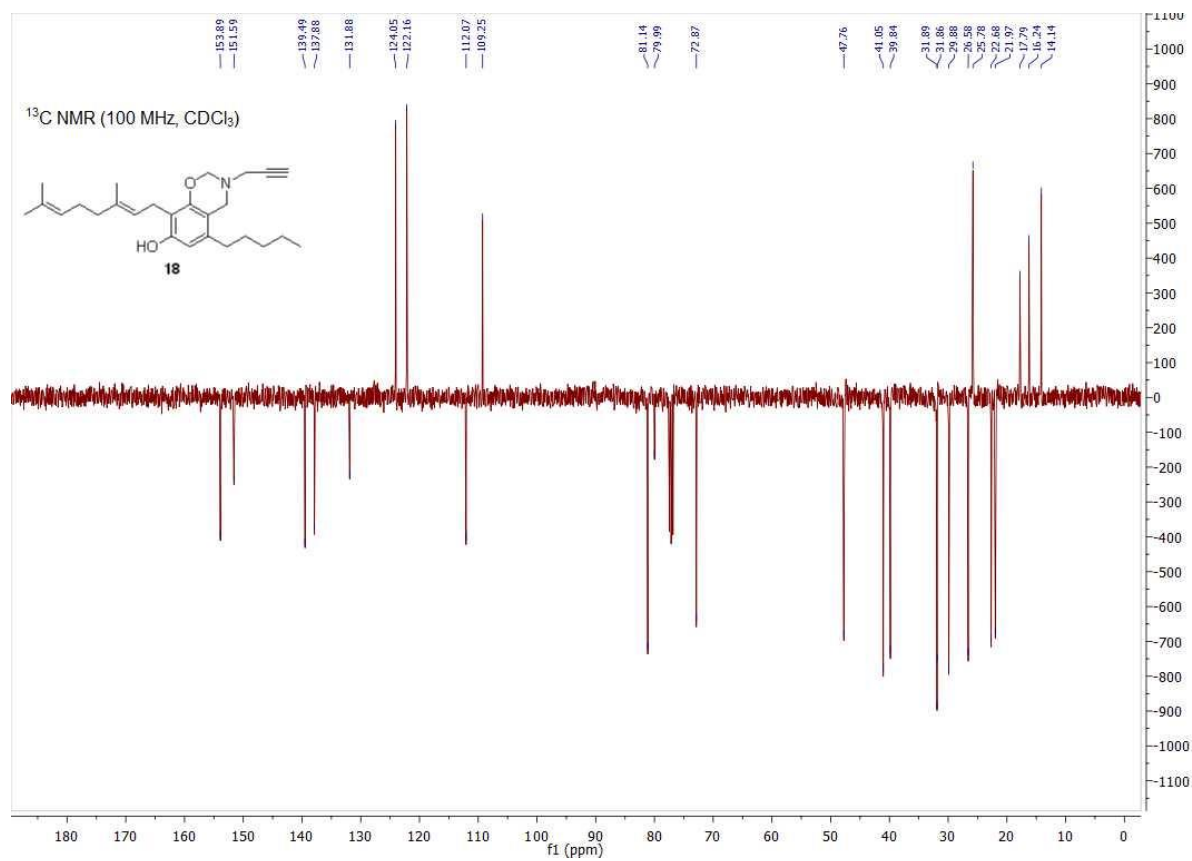

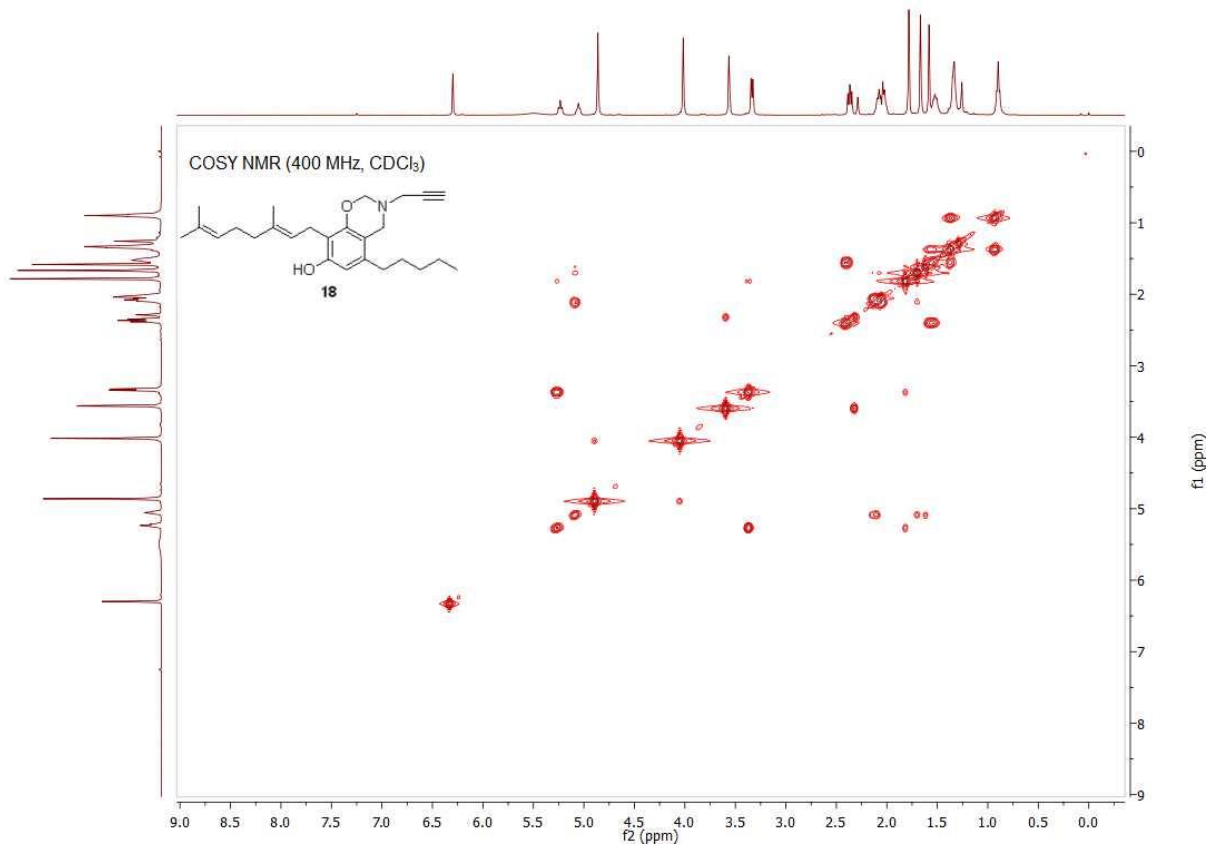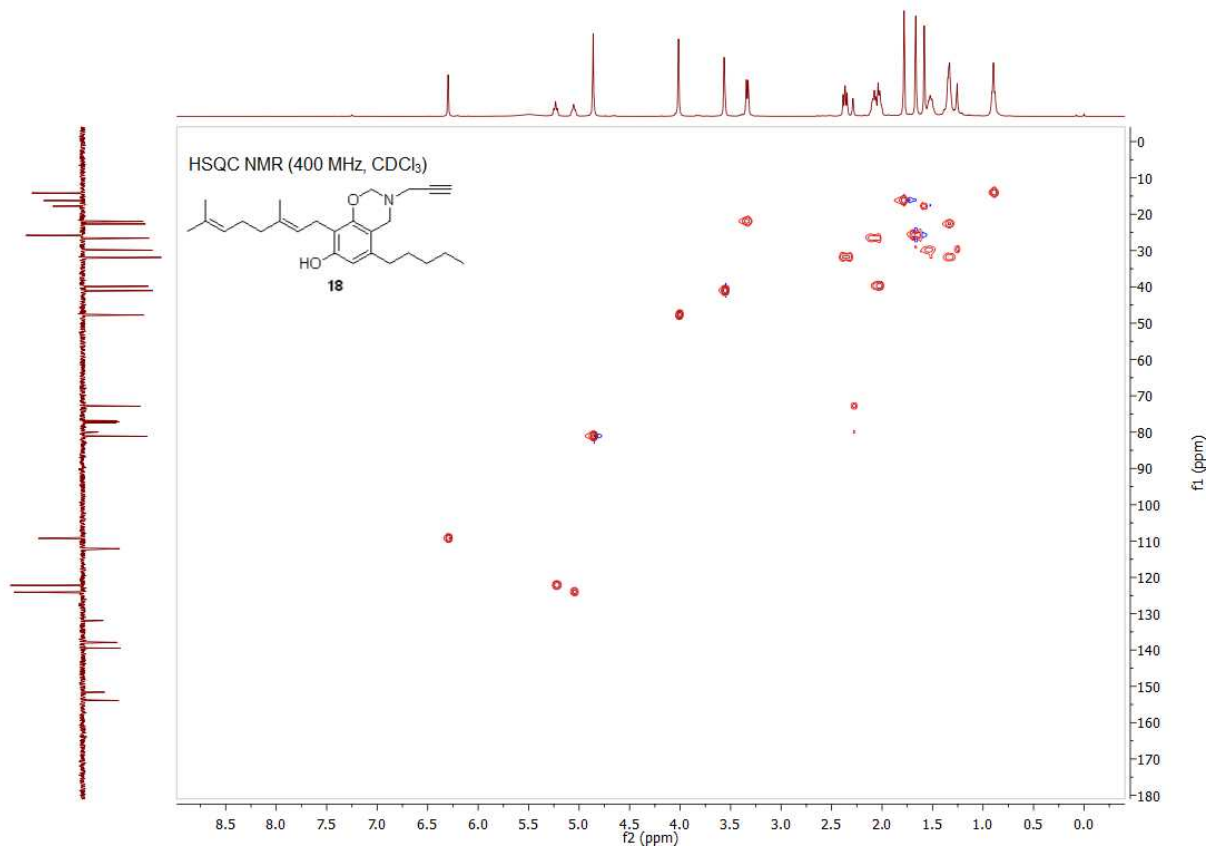

# NMR spectra of compound 19a

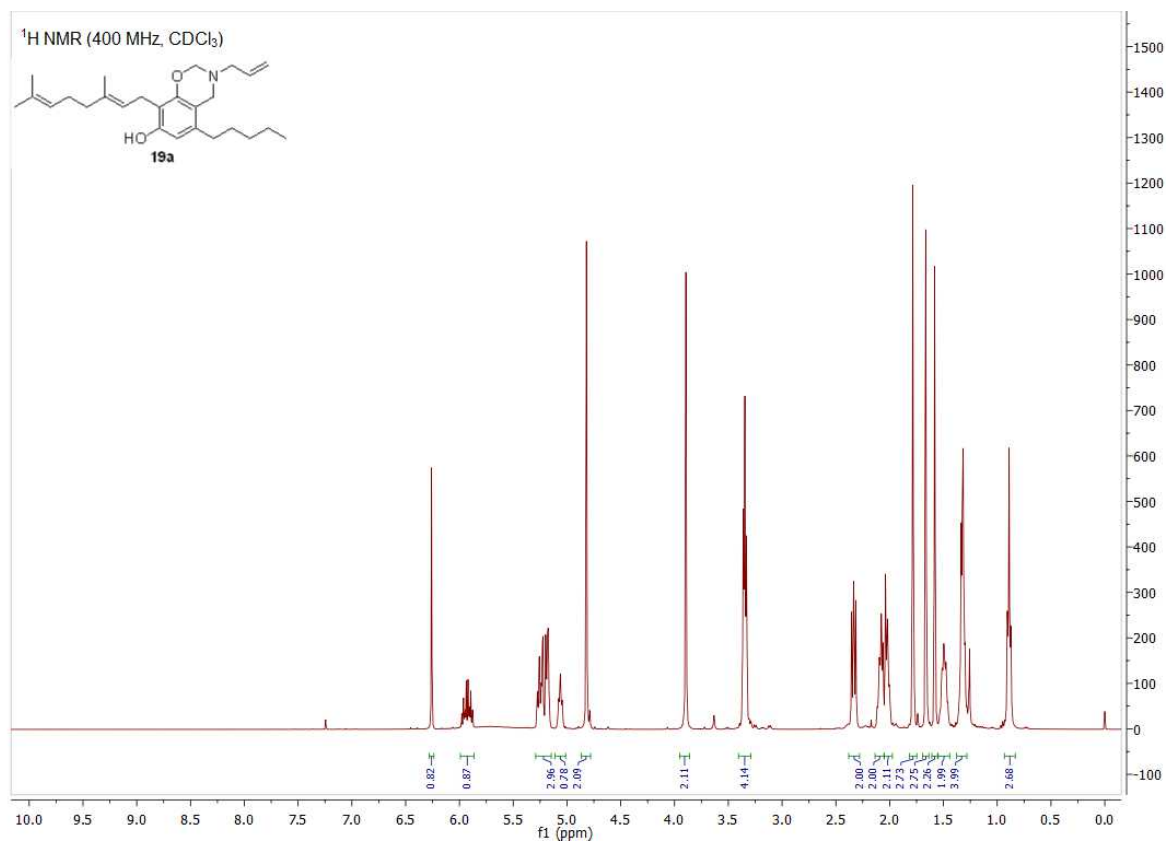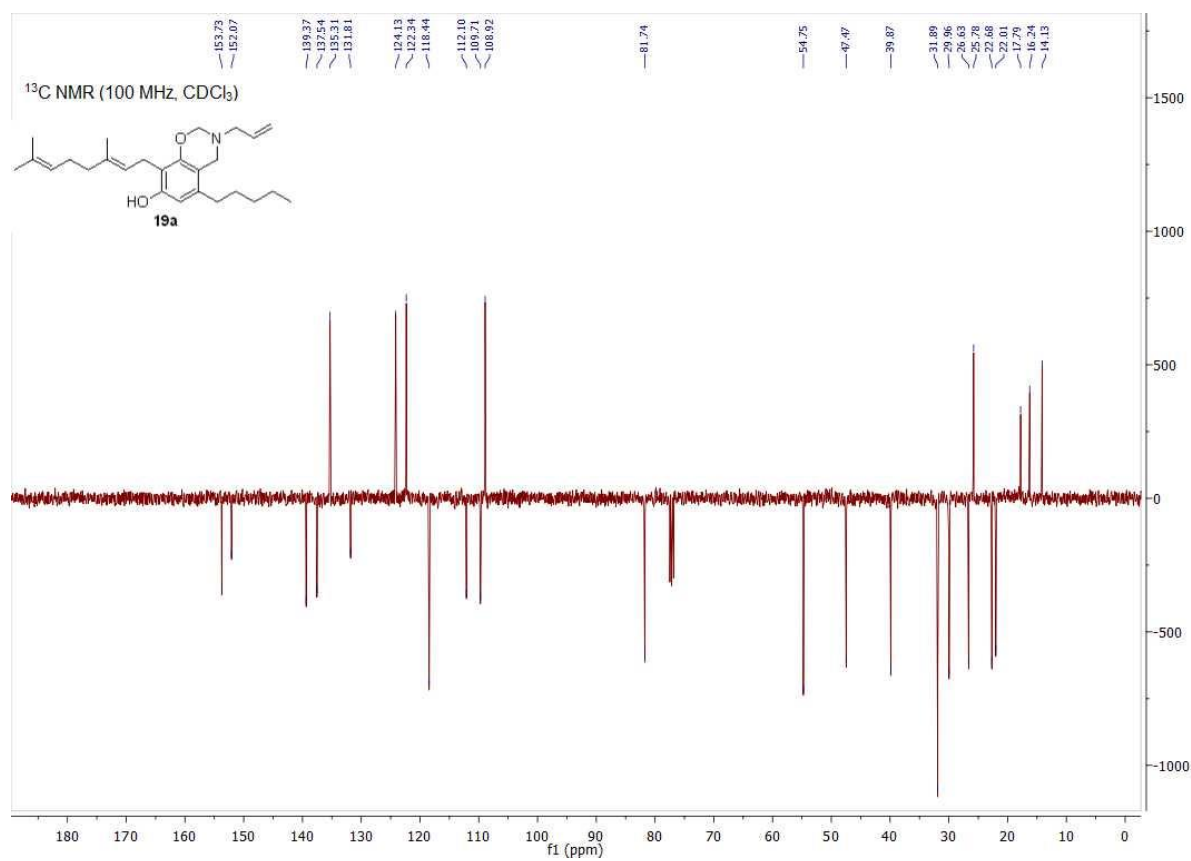

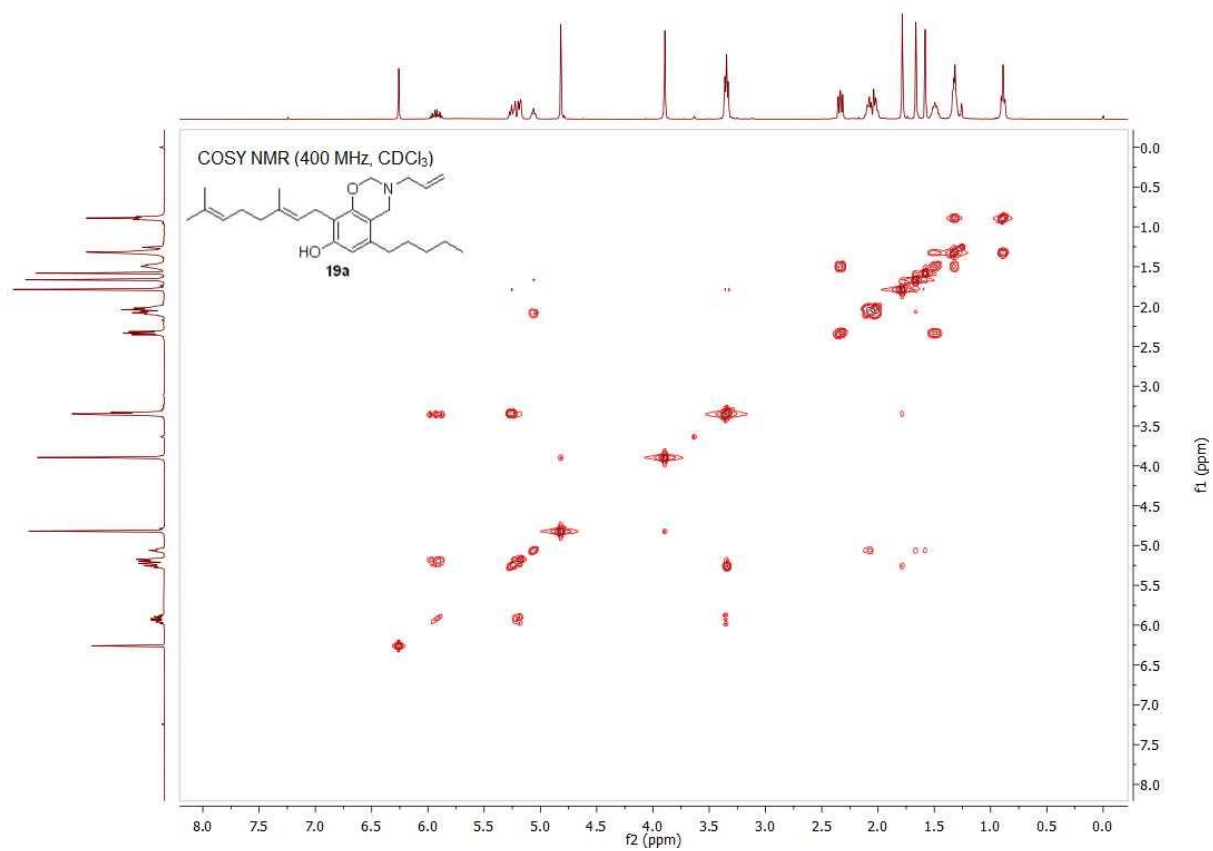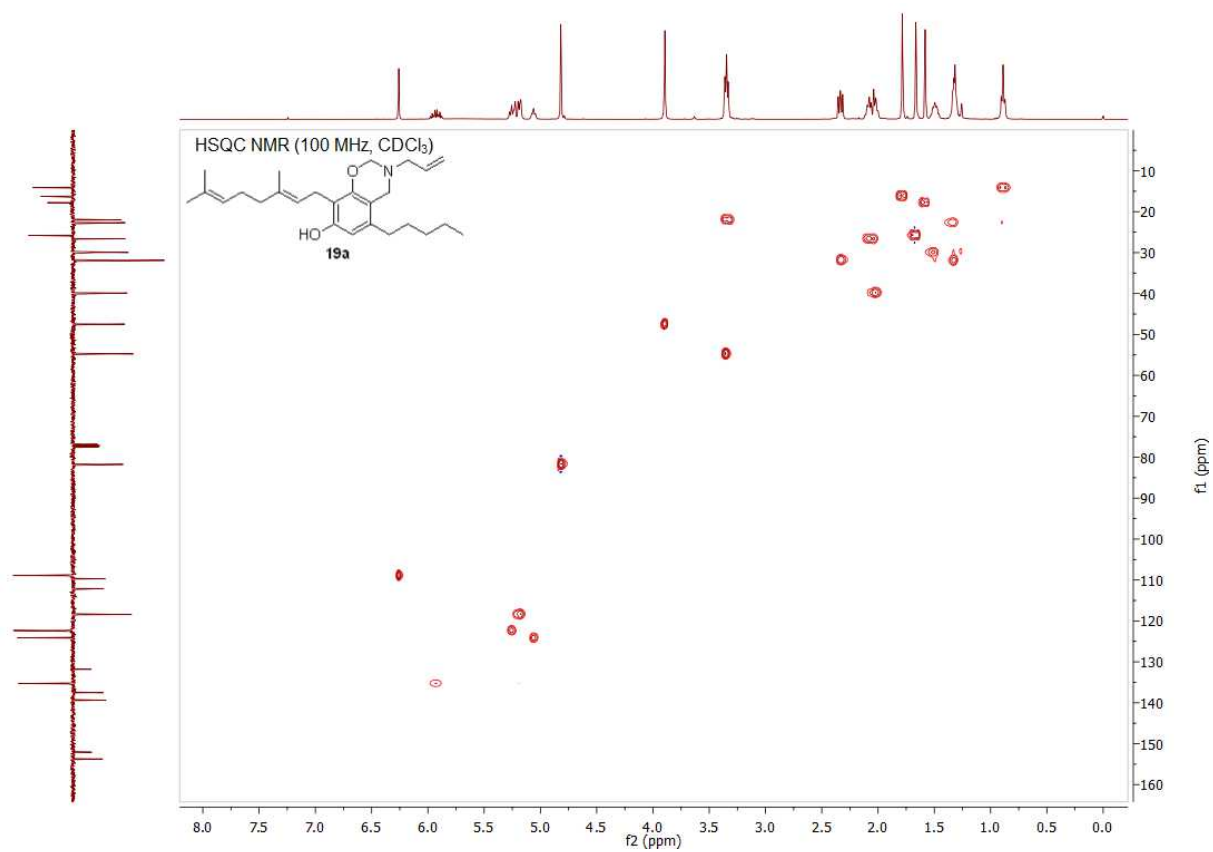

# NMR spectra of compound 19b

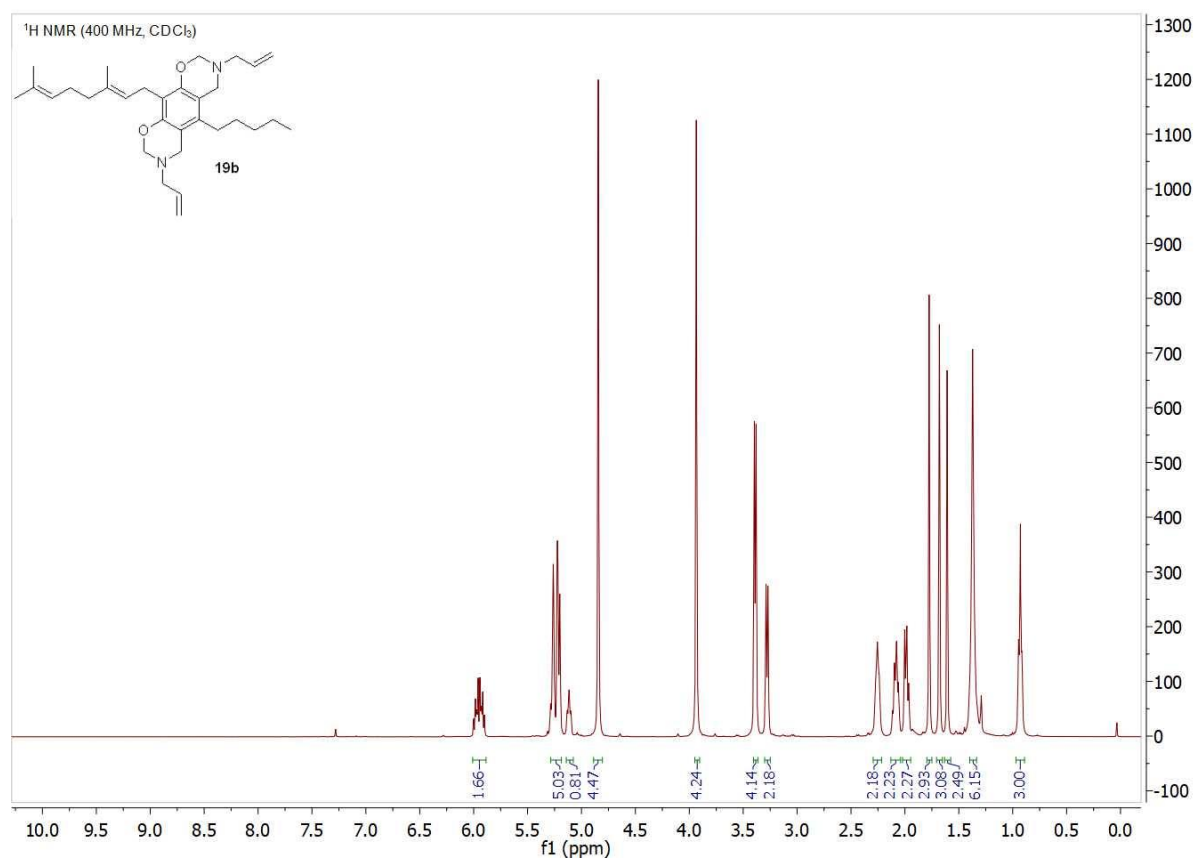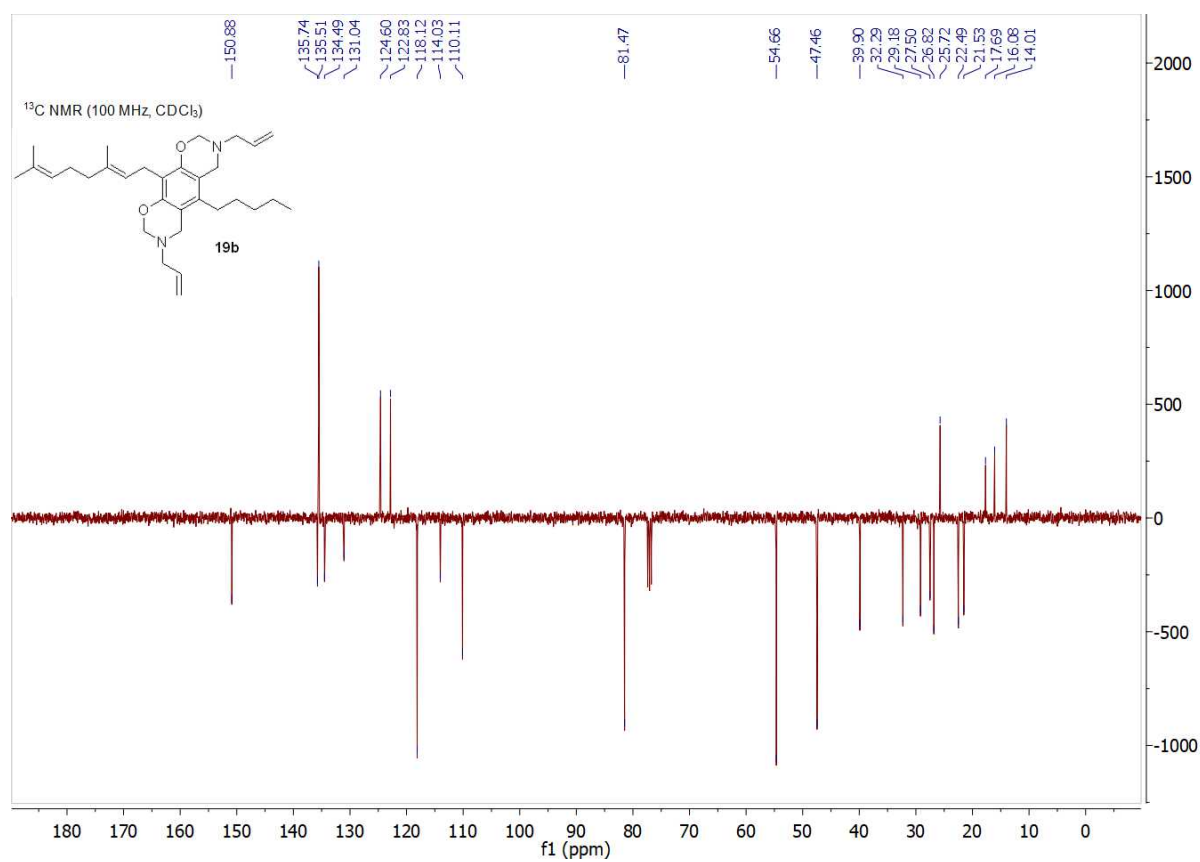

## NMR spectra of compound 20

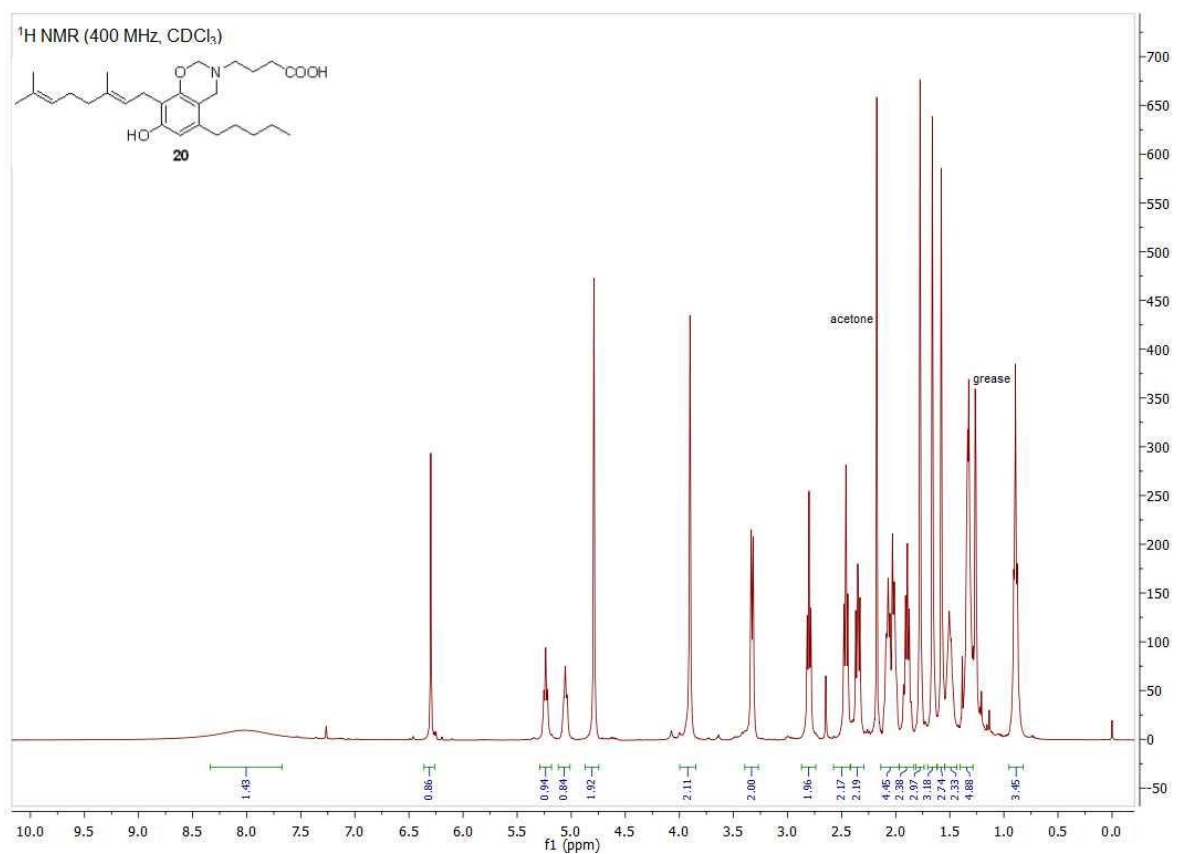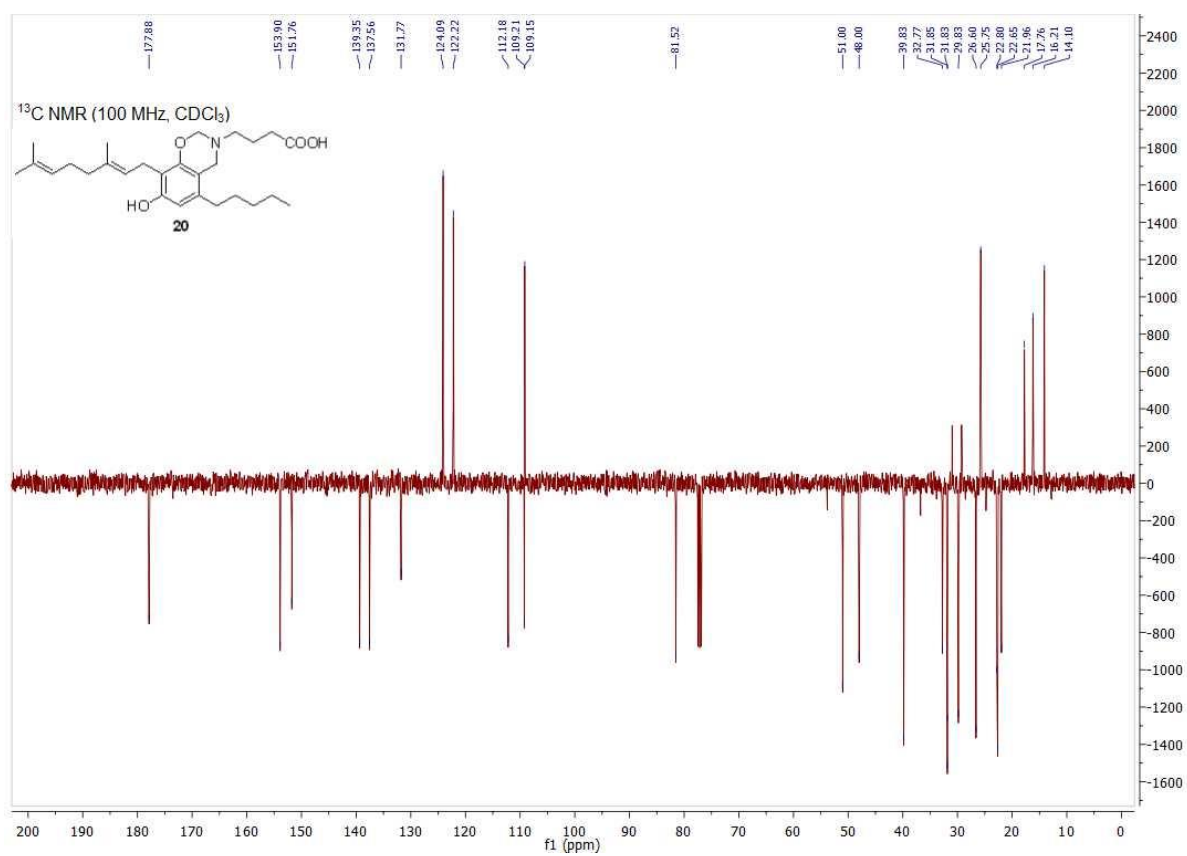

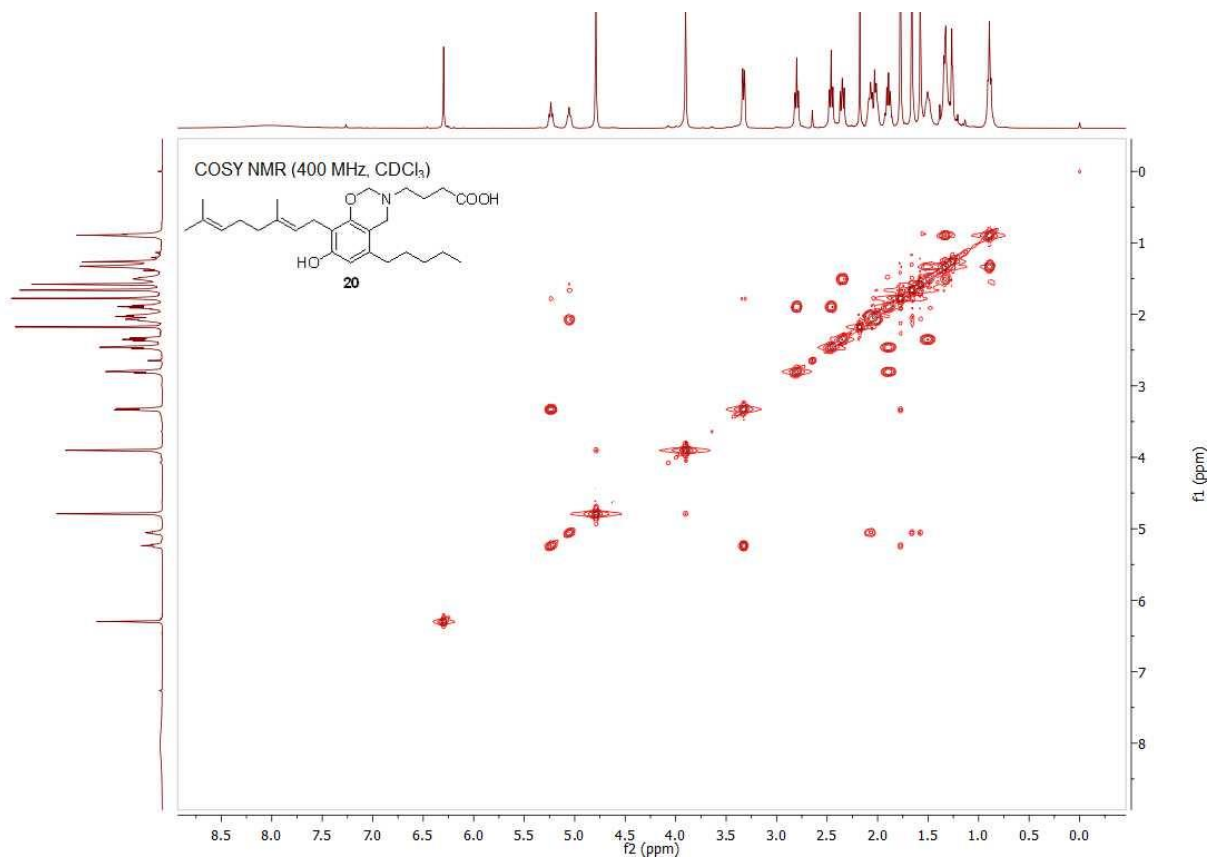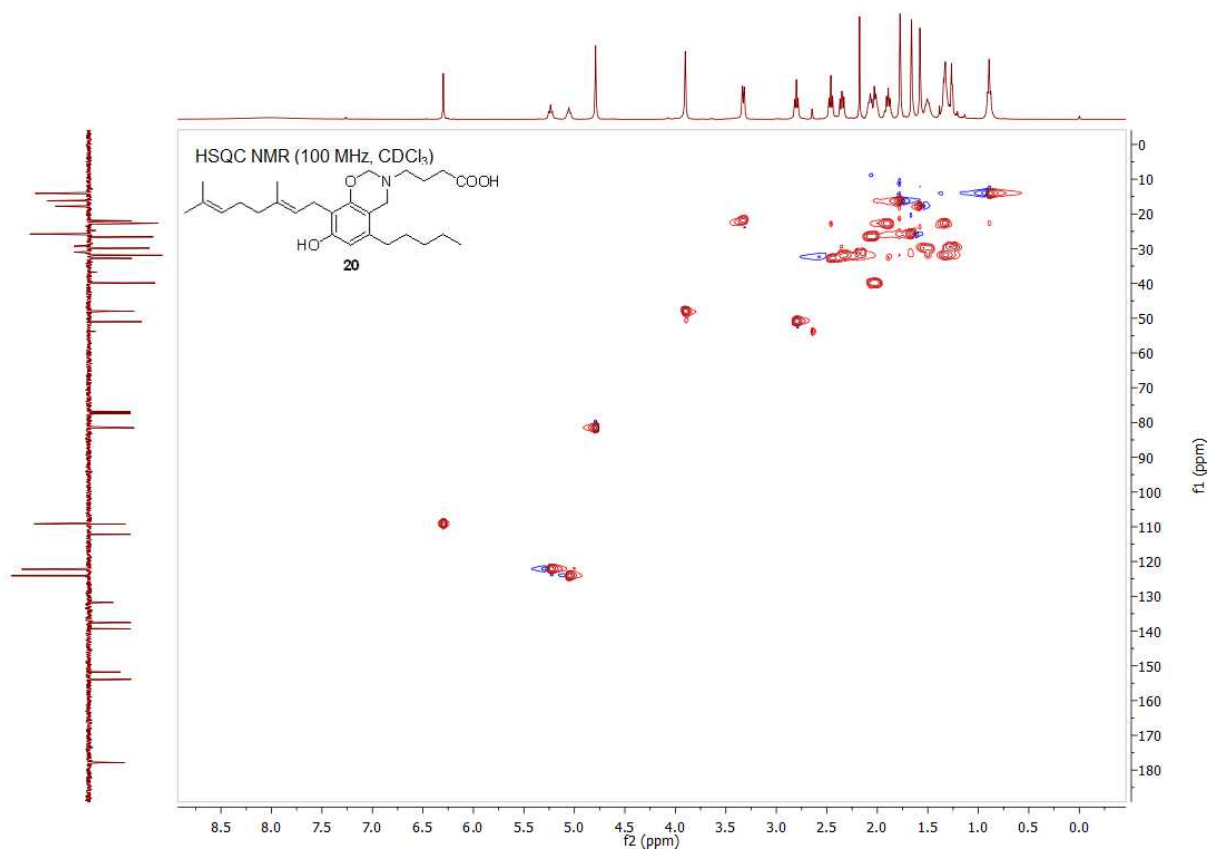

# NMR spectra of compound 21a

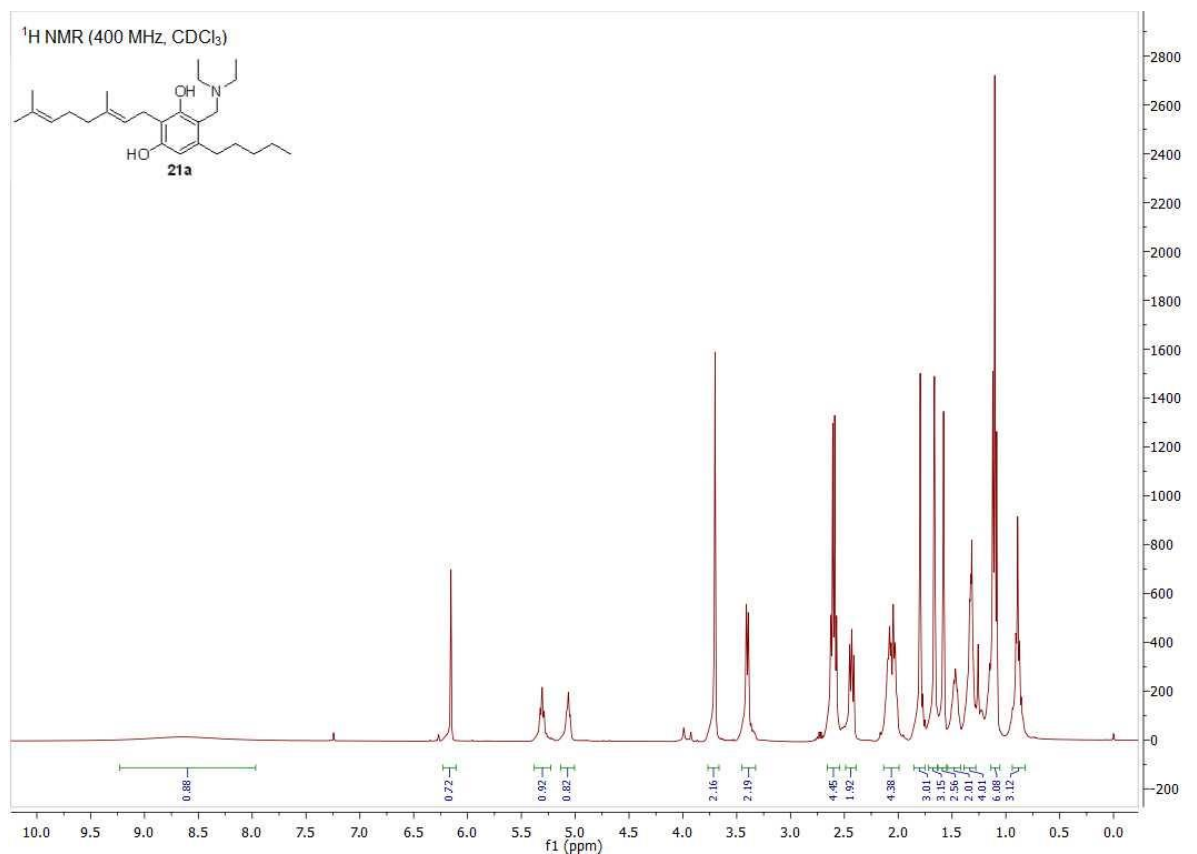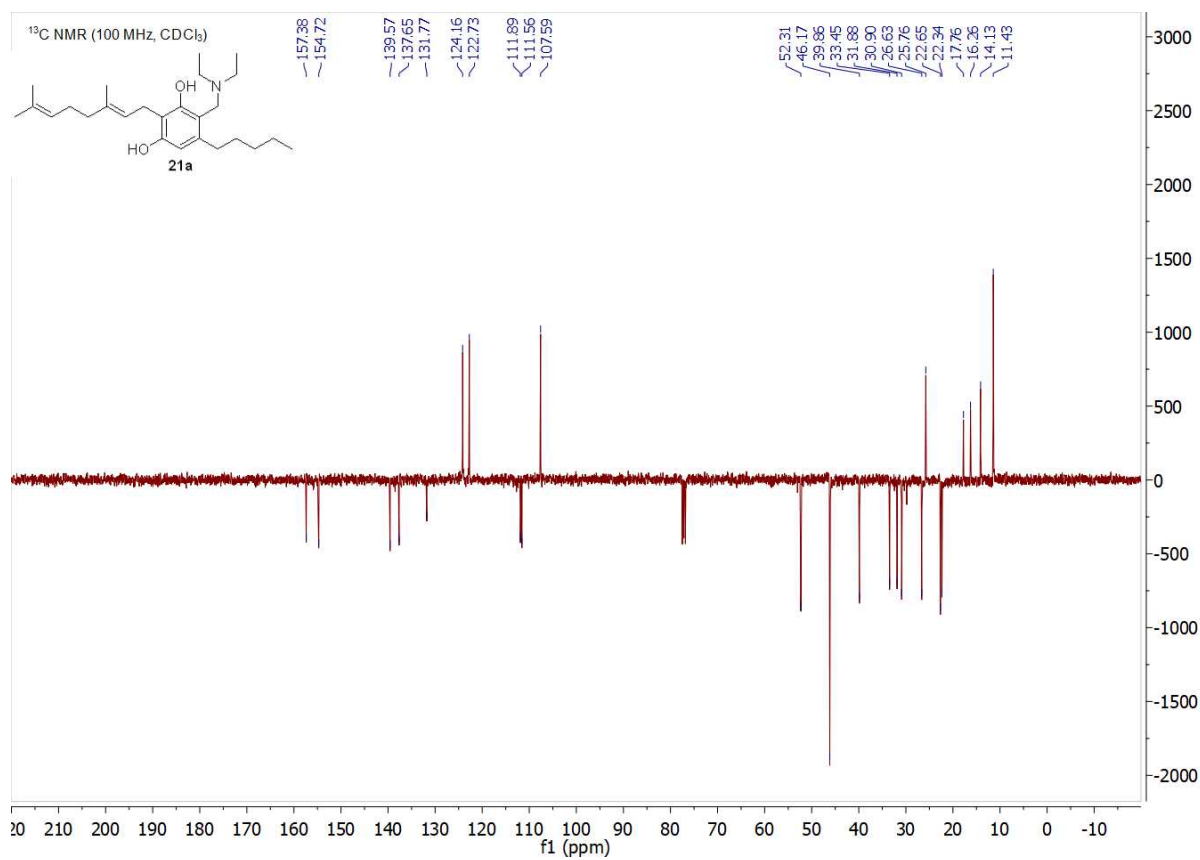

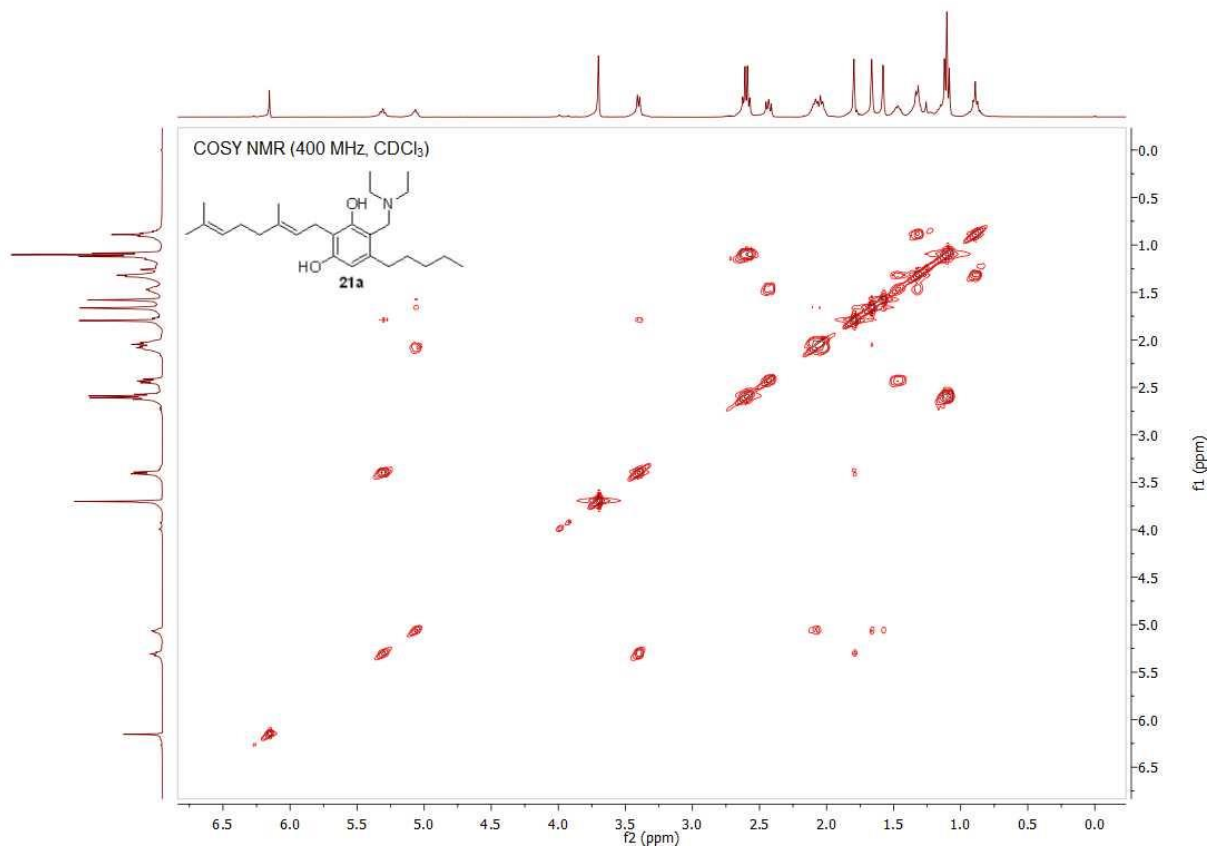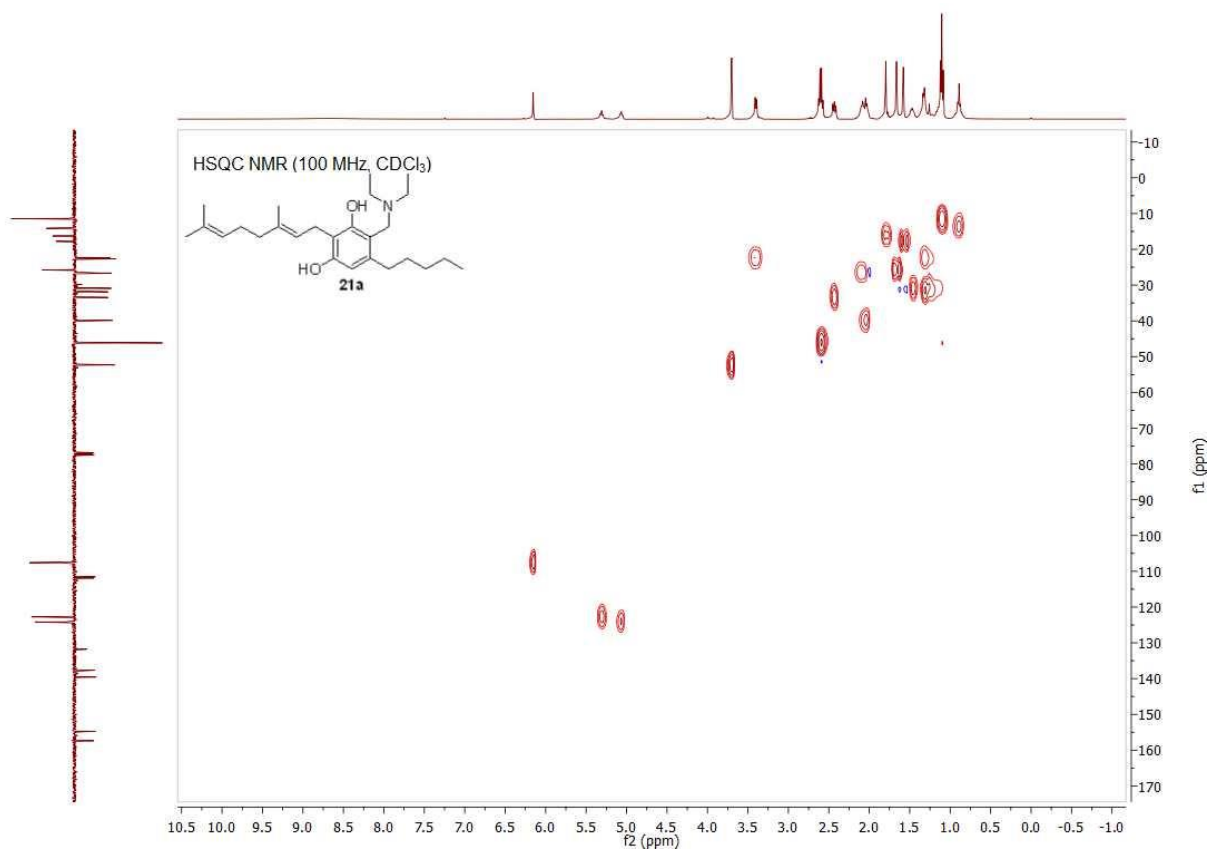

# NMR spectra of compound 21b

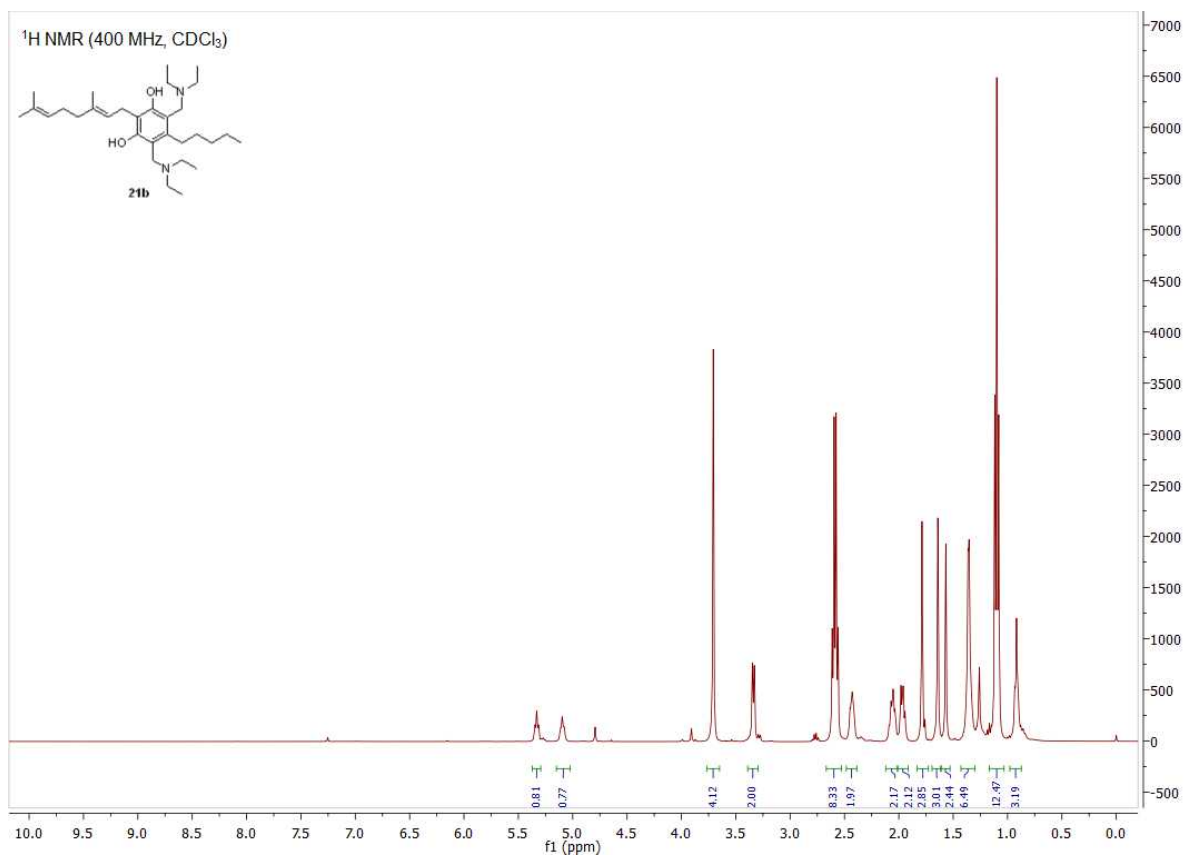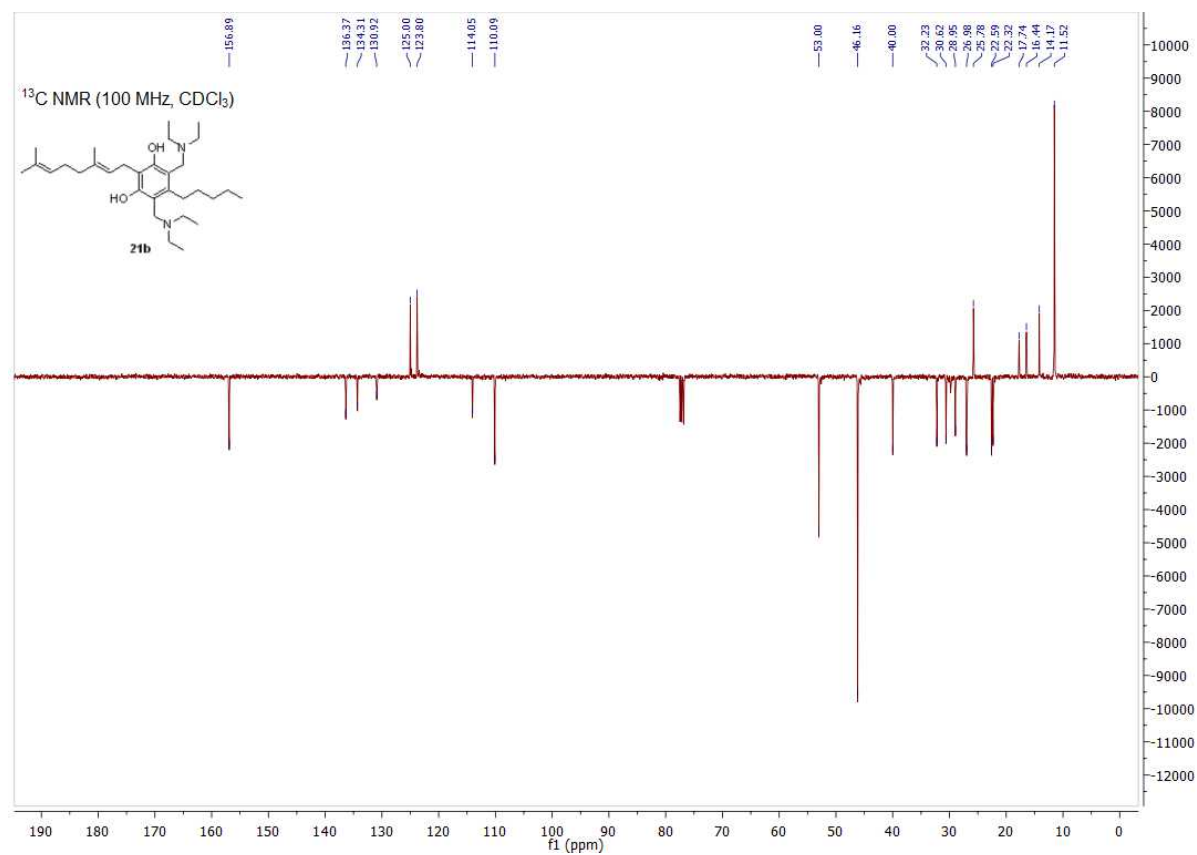

Supplement: MOESM1 [file 41598_2023_45565_MOESM1_ESM-1.pdf]
